# Supplementary material for: Stepwise approach for sterically hindered Csp3–Csp3 bond formation by dehydrogenative O-alkylation and Lewis acid-catalyzed [1,3]-rearrangement towards the arylalkylcyclopentane skeleton of sesquiterpenes
Source: Royal Society of Chemistry journal article supplement (doi:10.1039/d0cc01017k), 2020-01-01
Supplement: d0cc01017k1.pdf [file d0cc01017k1.pdf]

## Table of Contents

|                                                                                                   |            |
|---------------------------------------------------------------------------------------------------|------------|
| <b>1. Table and Scheme</b>                                                                        | <b>S2</b>  |
| <b>2. General Information</b>                                                                     | <b>S2</b>  |
| <b>3. Syntheses and Characterization Data of Compounds</b>                                        | <b>S3</b>  |
| <b>3-1. Preparation of substrates 1</b>                                                           |            |
| <b>3-2. Dehydrogenative O-alkylation to 2a and Lewis acid-catalyzed [1,3]-rearrangement to 3a</b> |            |
| <b>3-3. General procedure of dehydrogenative O-alkylation of 1 to 2</b>                           |            |
| <b>3-4. General procedure of [1,3]-rearrangement from 2 to 3</b>                                  |            |
| <b>3-5. General procedure of dealkoxycarbonylation of 3 to 10</b>                                 |            |
| <b>3-6. One-pot conversion of 11 to 31</b>                                                        |            |
| <b>3-7. Methylation of 31 to 5</b>                                                                |            |
| <b>3-8. [1,3]-Rearrangement of 21 to 31 using an asymmetric Cu catalyst (<i>S,S</i>)-4</b>        |            |
| <b>4. <sup>1</sup>H and <sup>13</sup>C NMR Spectra</b>                                            | <b>S22</b> |
| <b>5. References</b>                                                                              | <b>S79</b> |

## 1. Table and Scheme

**Table S1** [1,3]-Rearrangement from (*E*)-**2a** to **3a**

| entry          | acid                              | mol% | time (h) | yield (%) of <b>3a</b> |
|----------------|-----------------------------------|------|----------|------------------------|
| 1              | TfOH                              | 100  | 6        | 65                     |
| 2              | BF <sub>3</sub> ·OEt <sub>2</sub> | 100  | 18       | 71                     |
| 3              | BiCl <sub>3</sub>                 | 100  | 14       | 66                     |
| 4              | Me <sub>3</sub> SiOTf             | 100  | 13       | 63                     |
| 5              | Sc(OTf) <sub>3</sub>              | 100  | 13       | 94                     |
| 6              | Sc(OTf) <sub>3</sub>              | 30   | 6        | 86                     |
| 7 <sup>a</sup> | Sc(OTf) <sub>3</sub>              | 30   | 6        | 87                     |

<sup>a</sup> (*Z*)-**2a** was used

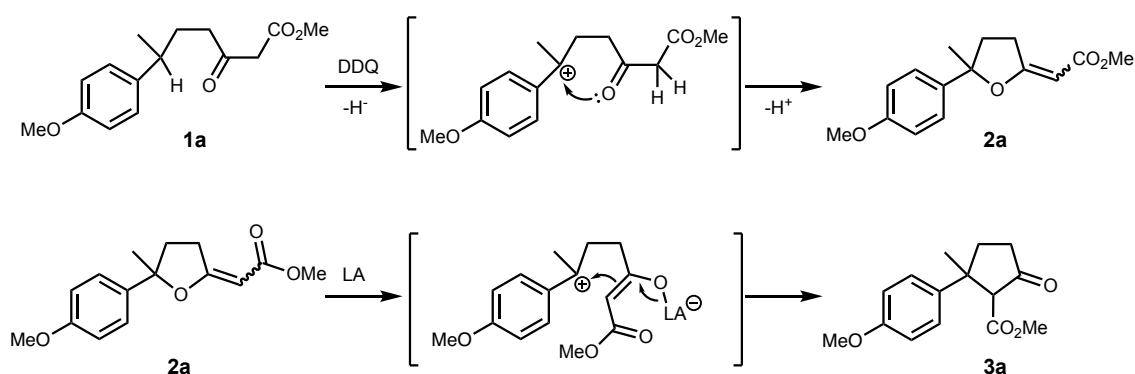

**Scheme S1.** Proposed reaction mechanism

## 2. General Information

Reagents and solvents for syntheses were commercially purchased and air and/or moisture sensitive reactions were carried out by using dry solvents under an argon atmosphere. TLC analysis was performed using Merck TLC Silica gel 60 F<sub>254</sub>. Preparative thin-layer chromatography (PTLC) was conducted using Merck PLC Silica gel 60 F<sub>254</sub> 0.5 mm. Flash silica gel column chromatography was performed on Wako Wakosil<sup>®</sup> C-300. IR spectra were recorded on a Jasco FT/IR-4700 spectrometer with ATR PRO ONE in ATR mode using diamond prism. <sup>1</sup>H and <sup>13</sup>C NMR spectra were measured on a Bruker spectrometer at 500 and 125 MHz. CDCl<sub>3</sub> was used as a solvent and the residual solvent peaks were used as an internal standard (<sup>1</sup>H NMR: 7.26 ppm; <sup>13</sup>C NMR: 77.0 ppm). High resolution (HR) mass spectra (MS) were measured on JEOL JMS-T100LP using electrospray ionization (ESI). Optical rotation values were recorded on a Jasco P-1010 polarimeter. The reactions at high temperature was performed with EYELA ChemiStation.

### 3. Synthesis and Characterization Data of Compounds

#### 3-1. Preparation of substrates 1

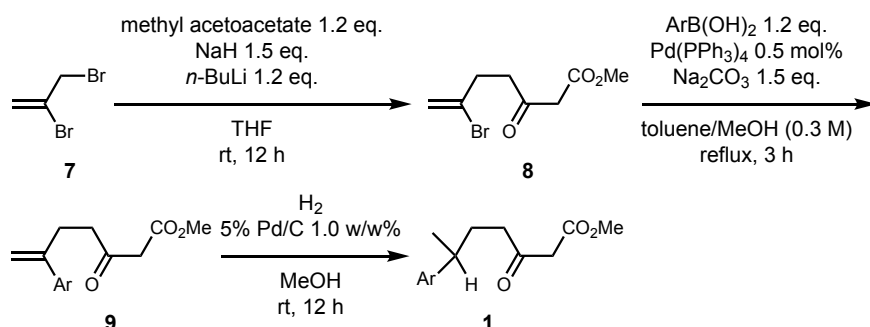

Scheme S2. Preparation of methyl 6-aryl-3-oxoheptanoate (1)

#### Methyl 6-bromo-3-oxohept-6-enoate (8)

Sodium hydride (3.00 g, 60% in mineral oil, 75.0 mmol) was suspended in THF (40 mL) under an argon atmosphere and the suspension was cooled to 0 °C. Methyl acetoacetate (6.97 g, 60.0 mmol) in THF (40 mL) was added dropwise to the suspension over 15 min and the mixture was stirred for 1 hour. At this stage, the suspension became homogeneous solution. 1.25 M *n*-BuLi in hexane (48.0 mL, 60.0 mmol) was added dropwise to the solution over 30 min and the mixture was stirred for 1 hour. 2,3-Dibromopropene (7) (10.0 g, 50.0 mmol) in THF (70 mL) was added dropwise to the solution over 10 min at 0 °C and the mixture was stirred for 12 hours at room temperature. The reaction was quenched by addition of 2 M HCl aq. (60 mL) and the organic layer was separated. The aqueous layer was extracted with EtOAc (60 mL×2). The combined organic layer was washed with brine, dried over Na<sub>2</sub>SO<sub>4</sub> and filtered through a cotton plug. The filtrate was concentrated in vacuo and the residue was purified by silica gel chromatography with hexane/EtOAc (5/1) to give methyl 6-bromo-3-oxohept-6-enoate (8) (9.87 g, 84% yield) as a yellow oil; IR (ATR):  $\nu$  2953, 1743, 1716, 1631, 1436, 1407, 1322, 1254, 1200, 1156, 1110, 1083, 996, 894 cm<sup>-1</sup>; <sup>1</sup>H NMR (CDCl<sub>3</sub>):  $\delta$  5.64 (1H, m), 5.43 (1H, m), 3.75 (3H, s), 3.48 (3H, s), 2.85 (2H, t, *J* = 7.5 Hz), 2.73 (2H, t, *J* = 7.5 Hz) ppm; <sup>13</sup>C NMR (CDCl<sub>3</sub>):  $\delta$  200.6, 172.9, 132.2, 117.9, 51.2, 49.1, 41.3, 35.1 ppm; HRMS (*m/z*) for C<sub>8</sub>H<sub>11</sub>O<sub>3</sub><sup>79</sup>Br(Na<sup>+</sup>): calculated 256.9789, found 256.9807.

#### General procedure of preparation of methyl 6-aryl-3-oxohept-6-enoate (9)

Aryl boronic acid (1.2 eq.) and sodium carbonate (1.5 eq.) were suspended in MeOH (1.5-15.0 mL) under an argon atmosphere. Methyl 6-bromo-3-oxohept-6-enoate (8) (1.00-10.0 mmol) in toluene (1.5-15.0 mL) was added to the suspension. Tetrakis(triphenylphosphine)palladium (0.5 mol%) was added and the mixture was stirred for 3 hours at 80 °C. The reaction was quenched by addition of 0.1 M phosphate buffer (pH 7) and the organic layer was separated. The aqueous layer was extracted with EtOAc twice. The combined organic layer was washed with brine, dried over Na<sub>2</sub>SO<sub>4</sub>, filtered through a cotton plug. The filtrate was concentrated in vacuo and the residue was purified by silica gel chromatography with EtOAc/hexane to give methyl 6-aryl-3-oxohept-6-enoate (9).

**Methyl 6-(4-methoxyphenyl)-3-oxohept-6-enoate (9a):** yellow oil; 83% yield (10.0 mmol scale); IR (ATR):  $\nu$  2952, 1746, 1715, 1607, 1512, 1438, 1322, 1286, 1249, 1181, 1033, 896, 838  $\text{cm}^{-1}$ ;  $^1\text{H}$  NMR ( $\text{CDCl}_3$ ):  $\delta$  7.33 (2H, d,  $J = 8.9$  Hz), 6.87 (2H, d,  $J = 8.9$  Hz), 5.23 (1H, m), 4.99 (1H, m), 3.81 (3H, s), 3.72 (3H, s), 3.42 (2H, s), 2.79 (2H, t,  $J = 7.8$  Hz), 2.68 (2H, t,  $J = 7.8$  Hz) ppm;  $^{13}\text{C}$  NMR ( $\text{CDCl}_3$ ):  $\delta$  202.0, 167.5, 159.3, 146.0, 132.8, 127.2, 113.8, 111.5, 55.3, 52.3, 49.1, 41.9, 29.0 ppm; HRMS ( $m/z$ ) for  $\text{C}_{15}\text{H}_{18}\text{O}_4(\text{Na}^+)$ : calculated 285.1103, found 285.1083.

**Methyl 6-(2-methoxyphenyl)-3-oxohept-6-enoate (9b):** colorless oil; 97% yield (1.00 mmol scale); IR (ATR):  $\nu$  2952, 1746, 1715, 1630, 1598, 1490, 1455, 1436, 1319, 1241, 1181, 1094, 1047, 1026, 905, 756  $\text{cm}^{-1}$ ;  $^1\text{H}$  NMR ( $\text{CDCl}_3$ ):  $\delta$  7.26 (1H, ddd,  $J = 8.2, 7.8, 1.8$  Hz), 7.11 (1H, dd,  $J = 7.4, 1.8$  Hz), 6.92 (1H, ddd,  $J = 7.8, 7.4, 1.0$  Hz), 6.87 (1H, dd,  $J = 8.2, 1.0$  Hz), 5.15 (1H, m), 5.04 (1H, m), 3.81 (3H, s), 3.71 (3H, s), 3.39 (2H, s), 2.79 (2H, t,  $J = 7.6$  Hz), 2.59 (2H, t,  $J = 7.6$  Hz) ppm;  $^{13}\text{C}$  NMR ( $\text{CDCl}_3$ ):  $\delta$  202.2, 167.8, 156.5, 147.1, 131.1, 130.2, 128.8, 120.6, 115.0, 110.7, 55.4, 52.3, 49.0, 41.8, 30.2 ppm; HRMS ( $m/z$ ) for  $\text{C}_{15}\text{H}_{18}\text{O}_4(\text{Na}^+)$ : calculated 285.1103, found 285.1090.

**Methyl 6-(3-methoxyphenyl)-3-oxohept-6-enoate (9c):** colorless oil; 71% yield (1.00 mmol scale); IR (ATR):  $\nu$  2952, 1746, 1715, 1598, 1576, 1488, 1435, 1320, 1287, 1235, 1081, 1047, 903, 791  $\text{cm}^{-1}$ ;  $^1\text{H}$  NMR ( $\text{CDCl}_3$ ):  $\delta$  7.26 (1H, dd,  $J = 8.2, 7.9$  Hz), 6.97-6.91 (2H, m), 6.83 (1H, dd,  $J = 8.2, 2.5$  Hz), 5.30 (1H, br), 5.09 (1H, br), 3.82 (3H, s), 3.72 (3H, s), 3.42 (2H, s), 2.80 (2H, t,  $J = 7.5$  Hz), 2.69 (2H, t,  $J = 7.5$  Hz) ppm;  $^{13}\text{C}$  NMR ( $\text{CDCl}_3$ ):  $\delta$  201.8, 167.5, 159.7, 146.7, 142.0, 129.4, 118.6, 113.3, 113.0, 112.1, 55.3, 52.3, 49.1, 41.8, 29.1 ppm; HRMS ( $m/z$ ) for  $\text{C}_{15}\text{H}_{18}\text{O}_4(\text{Na}^+)$ : calculated 285.1103, found 285.1090.

**Methyl 6-(4-acetamidophenyl)-3-oxohept-6-enoate (9d):** colorless oil; 83% yield (2.00 mmol scale); IR (ATR):  $\nu$  3306, 2952, 1743, 1713, 1668, 1596, 1525, 1437, 1403, 1371, 1318, 1257, 1187, 1081, 1017, 899, 844  $\text{cm}^{-1}$ ;  $^1\text{H}$  NMR ( $\text{CDCl}_3$ ):  $\delta$  7.46 (2H, d,  $J = 8.5$  Hz), 7.37 (1H, br s), 7.34 (2H, d,  $J = 8.5$  Hz), 5.27 (1H, br), 5.04 (1H, br), 3.71 (3H, s), 3.42 (2H, s), 2.78 (2H, t,  $J = 7.6$  Hz), 2.68 (2H, t,  $J = 7.6$  Hz), 2.17 (3H, s) ppm;  $^{13}\text{C}$  NMR ( $\text{CDCl}_3$ ):  $\delta$  201.9, 168.2, 167.5, 145.9, 137.4, 136.3, 126.7, 119.8, 112.6, 52.4, 49.1, 41.8, 28.9, 24.6 ppm; HRMS ( $m/z$ ) for  $\text{C}_{16}\text{H}_{19}\text{NO}_4(\text{Na}^+)$ : calculated 312.1212, found 312.1197.

**Methyl 6-(benzofuran-5-yl)-3-oxohept-6-enoate (9e):** colorless oil; 82% yield (3.02 mmol scale); IR (ATR):  $\nu$  2952, 1745, 1715, 1628, 1469, 1437, 1406, 1323, 1265, 1195, 1133, 1113, 1030, 886, 819, 745  $\text{cm}^{-1}$ ;  $^1\text{H}$  NMR ( $\text{CDCl}_3$ ):  $\delta$  7.62 (1H, d,  $J = 2.2$  Hz), 7.59 (1H, d,  $J = 1.8$  Hz), 7.46 (1H, dd,  $J = 8.6, 0.9$  Hz), 7.33 (1H, dd,  $J = 8.6, 1.9$  Hz), 6.76 (1H, dd,  $J = 2.2, 0.9$  Hz), 5.28 (1H, br), 5.09 (1H, m), 3.70 (3H, s), 3.42 (2H, s), 2.87 (2H, t,  $J = 7.5$  Hz), 2.70 (2H, t,  $J = 7.5$  Hz) ppm;  $^{13}\text{C}$  NMR ( $\text{CDCl}_3$ ):  $\delta$  202.0, 167.5, 154.6, 147.0, 145.5, 135.5, 127.6, 122.9,



118.7, 112.8, 111.2, 106.7, 52.3, 49.1, 41.9, 29.6 ppm; HRMS ( $m/z$ ) for  $C_{16}H_{16}O_4(Na^+)$ : calculated 295.0946, found 295.0960.

**Methyl 6-(2,4-dimethoxyphenyl)-3-oxohept-6-enoate (9f)**: colorless oil; 93% yield (1.00 mmol scale); IR (ATR):  $\nu$  2952, 1746, 1715, 1606, 1576, 1504, 1455, 1438, 1411, 1302, 1279, 1208, 1160, 1096, 1034, 902, 835  $cm^{-1}$ ;  $^1H$  NMR ( $CDCl_3$ ):  $\delta$  7.03 (1H, d,  $J = 8.8$  Hz), 6.44 (1H, d,  $J = 2.3$  Hz), 6.44 (1H, dd,  $J = 8.9, 2.3$  Hz), 5.10 (1H, br), 5.00 (1H, br), 3.81 (3H, s), 3.79 (3H, s), 3.71 (3H, s), 3.39 (2H, s), 2.77 (2H, t,  $J = 7.6$  Hz), 2.57 (2H, t,  $J = 7.6$  Hz) ppm;  $^{13}C$  NMR ( $CDCl_3$ ):  $\delta$  202.3, 167.6, 160.5, 157.9, 146.7, 130.5, 123.7, 114.7, 104.2, 98.7, 55.4, 55.4, 52.3, 49.0, 42.0, 30.3 ppm; HRMS ( $m/z$ ) for  $C_{16}H_{20}O_5(Na^+)$ : calculated 315.1208, found 315.1237.

**Methyl 6-(3,4-dimethoxyphenyl)-3-oxohept-6-enoate (9g)**: colorless oil; 95% yield (1.00 mmol scale); IR (ATR):  $\nu$  2952, 1745, 1714, 1602, 1577, 1515, 1439, 1412, 1321, 1253, 1229, 1174, 1145, 1025, 895, 858, 813  $cm^{-1}$ ;  $^1H$  NMR ( $CDCl_3$ ):  $\delta$  6.94 (1H, dd,  $J = 8.1, 2.0$  Hz), 6.92 (1H, d,  $J = 2.0$  Hz), 6.83 (1H, d,  $J = 8.1$  Hz), 5.23 (1H, br), 5.01 (1H, br), 3.90 (3H, s), 3.89 (3H, s), 3.72 (3H, s), 3.42 (2H, s), 2.80 (2H, t,  $J = 7.5$  Hz), 2.70 (2H, t,  $J = 7.5$  Hz) ppm;  $^{13}C$  NMR ( $CDCl_3$ ):  $\delta$  202.0, 167.5, 148.9 (2C), 146.3, 133.3, 1118.5, 111.9, 111.0, 109.5, 55.9, 55.9, 52.3, 49.1, 41.9, 29.1 ppm; HRMS ( $m/z$ ) for  $C_{16}H_{20}O_5(Na^+)$ : calculated 315.1208, found 315.1231.

**Methyl 6-(2,5-dimethoxyphenyl)-3-oxohept-6-enoate (9h)**: colorless oil; 92% yield (1.00 mmol scale); IR (ATR):  $\nu$  2951, 1746, 1715, 1630, 1580, 1493, 1464, 1427, 1419, 1312, 1264, 1218, 1180, 1151, 1084, 1045, 1025, 906, 807  $cm^{-1}$ ;  $^1H$  NMR ( $CDCl_3$ ):  $\delta$  6.79 (2H, m), 6.70 (1H, dd,  $J = 2.3, 1.2$  Hz), 5.15 (1H, br), 5.05 (1H, br), 3.77 (3H, s), 3.76 (3H, s), 3.71 (3H, s), 3.40 (2H, s), 2.79 (2H, t,  $J = 7.6$  Hz), 2.60 (2H, t,  $J = 7.6$  Hz) ppm;  $^{13}C$  NMR ( $CDCl_3$ ):  $\delta$  202.1, 167.6, 153.5, 150.8, 146.9, 132.1, 116.3, 115.2, 112.9, 111.9, 56.1, 55.7, 52.3, 48.9, 41.8, 30.1 ppm; HRMS ( $m/z$ ) for  $C_{16}H_{20}O_5(Na^+)$ : calculated 315.1208, found 315.1237.

**Methyl 3-oxo-6-phenylhept-6-enoate (9i)**: yellow oil; 80% yield (10.0 mmol scale); IR (ATR):  $\nu$  2952, 1745, 1715, 1652, 1627, 1601, 1574, 1495, 1437, 1407, 1362, 1320, 1244, 1196, 1154, 1135, 1102, 1081, 1028, 997, 903, 780, 708  $cm^{-1}$ ;  $^1H$  NMR ( $CDCl_3$ ):  $\delta$  7.39-7.28 (5H, m), 5.30 (1H, br), 5.08 (1H, br), 3.71 (3H, s), 3.42 (3H, s), 2.82 (2H, t,  $J = 7.6$  Hz), 2.69 (2H, t,  $J = 7.6$  Hz) ppm;  $^{13}C$  NMR ( $CDCl_3$ ):  $\delta$  201.9, 167.5, 146.7, 140.4, 128.5, 127.7, 126.1, 113.1, 52.4, 49.1, 41.8, 29.0 ppm; HRMS ( $m/z$ ) for  $C_{14}H_{16}O_3(Na^+)$ : calculated 255.0997, found 255.1026.

**Methyl 3-oxo-6-(*p*-tolyl)hept-6-enoate (9j)**: colorless oil; 90% yield (1.00 mmol scale); IR (ATR):  $\nu$  2952, 1746, 1715, 1653, 1626, 1514, 1437, 1406, 1362, 1322, 1243, 1220, 1196, 1152, 1133, 1080, 1019, 997, 898, 826, 772, 737  $cm^{-1}$ ;  $^1H$  NMR ( $CDCl_3$ ):  $\delta$  7.28 (2H, d,  $J = 8.0$  Hz), 7.14 (2H, d,  $J = 8.0$  Hz), 5.27 (1H, br), 5.03 (1H, br), 3.72 (3H, s), 3.41 (2H, s), 2.80 (2H, t,  $J = 7.6$  Hz), 2.69 (2H, t,  $J = 7.6$  Hz), 2.35 (3H, s) ppm;  $^{13}C$  NMR ( $CDCl_3$ ):

$\delta$  202.0, 167.5, 146.5, 137.5, 137.4, 129.2, 125.9, 112.3, 52.3, 49.1, 41.9, 29.0, 21.1 ppm; HRMS ( $m/z$ ) for  $C_{15}H_{18}O_5(Na^+)$ : calculated 269.1154, found 269.1156.

**Methyl 6-(naphthalen-2-yl)-3-oxohept-6-enoate (9k)**: colorless oil; 80% yield (2.04 mmol scale); IR (ATR):  $\nu$  3054, 2952, 1746, 1715, 1625, 1436, 1406, 1320, 1270, 1199, 896, 861, 822, 754  $cm^{-1}$ ;  $^1H$  NMR ( $CDCl_3$ ):  $\delta$  7.84-7.80 (4H, m), 7.55 (1H, dd,  $J = 8.7, 1.7$  Hz), 7.50-7.45 (2H, m), 5.46 (1H, br s), 5.19 (1H, br s), 3.70 (3H, s), 3.43 (2H, s), 2.94 (2H, t,  $J = 7.5$  Hz), 2.75 (2H, t,  $J = 7.5$  Hz) ppm;  $^{13}C$  NMR ( $CDCl_3$ ):  $\delta$  202.0, 167.5, 146.5, 137.6, 133.4, 132.9, 128.2, 128.1, 127.6, 126.3, 126.0, 124.7, 124.5, 113.7, 52.4, 49.1, 41.9, 29.0 ppm; HRMS ( $m/z$ ) for  $C_{18}H_{18}O_3(Na^+)$ : calculated 305.1154, found 305.1139.

**Methyl 6-(4-methoxy-3-methylphenyl)-3-oxohept-6-enoate (9l)**: yellow oil; 83% yield (4.80 mmol scale); IR (ATR):  $\nu$  2952, 1745, 1715, 1626, 1606, 1505, 1438, 147, 1323, 1296, 1250, 1200, 1174, 1141, 1108, 1082, 1032, 998, 889, 817  $cm^{-1}$ ;  $^1H$  NMR ( $CDCl_3$ ):  $\delta$  7.25-7.17 (2H, m), 6.78 (1H, d,  $J = 9.1$  Hz), 5.21 (1H, br), 4.97 (1H, br), 3.83 (3H, s), 3.72 (3H, s), 3.42 (2H, s), 2.78 (2H, t,  $J = 7.5$  Hz), 2.69 (2H, t,  $J = 7.5$  Hz), 2.22 (3H, s) ppm;  $^{13}C$  NMR ( $CDCl_3$ ):  $\delta$  202.1, 167.5, 157.5, 146.2, 132.3, 128.5, 126.5, 124.4, 111.3, 109.7, 55.4, 52.3, 49.1, 42.0, 29.1, 16.3 ppm; HRMS ( $m/z$ ) for  $C_{16}H_{20}O_4(Na^+)$ : calculated 299.1259, found 299.1230.

**Methyl 6-(2,5-dimethoxy-4-methylphenyl)-3-oxohept-6-enoate (9m)**: colorless oil; 90% yield (1.00 mmol scale); IR (ATR):  $\nu$  2951, 1746, 1715, 1628, 1503, 1465, 1437, 1397, 1374, 1319, 1210, 1043, 903, 868  $cm^{-1}$ ;  $^1H$  NMR ( $CDCl_3$ ):  $\delta$  6.69 (1H, s), 6.61 (1H, m), 5.14 (1H, br), 5.05 (1H, br), 3.79 (3H, s), 3.76 (3H, s), 3.70 (3H, s), 3.40 (2H, s), 2.79 (2H, t,  $J = 7.6$  Hz), 2.60 (2H, t,  $J = 7.6$  Hz), 2.22 (3H, s) ppm;  $^{13}C$  NMR ( $CDCl_3$ ):  $\delta$  202.2, 167.6, 151.6, 150.1, 147.1, 128.8, 126.7, 114.8, 114.4, 112.7, 56.3, 56.1, 52.3, 49.0, 41.8, 30.3, 16.2 ppm; HRMS ( $m/z$ ) for  $C_{17}H_{22}O_5(Na^+)$ : calculated 329.1365, found 329.1371.

**Methyl 6-(3-methoxy-4-methylphenyl)-3-oxohept-6-enoate (9n)**: colorless oil; 80% yield (1.00 mmol scale); IR (ATR):  $\nu$  2952, 1746, 1715, 1653, 1626, 1609, 1573, 1507, 1437, 1407, 1319, 1239, 1203, 1175, 1136, 1100, 1081, 1038, 995, 896, 858, 820  $cm^{-1}$ ;  $^1H$  NMR ( $CDCl_3$ ):  $\delta$  7.08 (1H, d,  $J = 7.6$  Hz), 6.88 (1H, dd,  $J = 7.6, 1.6$  Hz), 6.84 (1H, d,  $J = 1.6$  Hz), 5.27 (1H, br), 5.05 (1H, br), 3.84 (3H, s), 3.71 (3H, s), 3.42 (2H, s), 2.81 (2H, t,  $J = 7.5$  Hz), 2.70 (2H, t,  $J = 7.5$  Hz), 2.21 (3H, s) ppm;  $^{13}C$  NMR ( $CDCl_3$ ):  $\delta$  202.0, 167.5, 157.7, 146.9, 139.3, 130.5, 126.3, 118.0, 112.4, 107.9, 55.3, 52.3, 49.1, 41.9, 29.2, 15.9 ppm; HRMS ( $m/z$ ) for  $C_{16}H_{20}O_4(Na^+)$ : calculated 299.1259, found 299.1234.

#### General procedure of preparation of methyl 6-aryl-3-oxoheptanoate (1)

Methyl 6-aryl-3-oxohept-6-enoate (9) (0.71-8.30 mmol) was dissolved in MeOH (0.1 M) and 5% Pd/C (1.0 w/w% based on the weight of Pd/C) was added to the solution. The reaction was stirred under  $H_2$  atmosphere with a

balloon at room temperature for 12 hours and filtered through Celite<sup>®</sup>. The filtrate was concentrated in vacuo and the residue was purified by silica gel chromatography with hexane/EtOAc to give methyl 6-aryl-3-oxoheptanoate (**1**).

**Methyl 6-(4-methoxyphenyl)-3-oxoheptanoate (1a)**: colorless oil; 99% yield (8.30 mmol scale); IR (ATR):  $\nu$  2954, 1746, 1714, 1611, 1583, 1513, 1438, 1408, 1303, 1247, 1179, 1035, 913, 833  $\text{cm}^{-1}$ ;  $^1\text{H}$  NMR ( $\text{CDCl}_3$ ):  $\delta$  7.07 (2H, d,  $J = 8.6$  Hz), 6.84 (2H, d,  $J = 8.6$  Hz), 3.79 (3H, s), 3.70 (3H, s), 3.35 (2H, s), 2.65 (1H, m), 2.42 (1H, ddd,  $J = 17.6, 8.8, 6.5$  Hz), 2.35 (1H, ddd,  $J = 17.6, 8.8, 5.6$  Hz), 1.90 (1H, m), 1.80 (1H, m), 1.23 (3H, d,  $J = 6.9$  Hz) ppm;  $^{13}\text{C}$  NMR ( $\text{CDCl}_3$ ):  $\delta$  202.7, 167.6, 158.0, 138.2, 127.9, 113.9, 55.3, 52.3, 49.0, 41.3, 38.4, 31.7, 22.6 ppm; HRMS ( $m/z$ ) for  $\text{C}_{15}\text{H}_{20}\text{O}_4(\text{Na}^+)$ : calculated 287.1259, found 287.1251.

**Methyl 6-(2-methoxyphenyl)-3-oxoheptanoate (1b)**: colorless oil; 93% yield (0.97 mmol scale); IR (ATR):  $\nu$  2956, 1747, 1715, 1653, 1626, 1599, 1585, 1492, 1456, 1438, 1407, 1364, 1317, 1289, 1240, 1194, 1151, 1093, 1028, 756  $\text{cm}^{-1}$ ;  $^1\text{H}$  NMR ( $\text{CDCl}_3$ ):  $\delta$  7.17 (1H, ddd,  $J = 8.2, 7.5, 1.7$  Hz), 7.14 (1H, dd,  $J = 7.5, 1.7$  Hz), 6.92 (1H, ddd,  $J = 7.5, 7.5, 1.0$  Hz), 6.85 (1H, dd,  $J = 8.2, 1.0$  Hz), 3.80 (3H, s), 3.69 (3H, s), 3.36 (2H, s), 3.20 (1H, m), 2.45 (1H, ddd,  $J = 17.4, 9.1, 6.5$  Hz), 2.36 (1H, ddd,  $J = 17.4, 8.9, 5.7$  Hz), 1.95-1.82 (2H, m), 1.22 (3H, d,  $J = 7.0$  Hz) ppm;  $^{13}\text{C}$  NMR ( $\text{CDCl}_3$ ):  $\delta$  202.8, 167.7, 157.1, 134.3, 127.0, 126.8, 120.8, 110.6, 55.3, 52.2, 48.9, 41.3, 31.3, 30.6, 20.9 ppm; HRMS ( $m/z$ ) for  $\text{C}_{15}\text{H}_{20}\text{O}_4(\text{Na}^+)$ : calculated 287.1259, found 287.1239.

**Methyl 6-(3-methoxyphenyl)-3-oxoheptanoate (1c)**: colorless oil; 95% yield (0.71 mmol scale); IR (ATR):  $\nu$  2957, 1746, 1715, 1654, 1600, 1584, 1487, 1455, 1437, 1407, 1317, 1258, 1196, 1162, 1042, 787  $\text{cm}^{-1}$ ;  $^1\text{H}$  NMR ( $\text{CDCl}_3$ ):  $\delta$  7.20 (1H, dd,  $J = 7.9, 7.8$  Hz), 6.75-6.70 (3H, m), 3.79 (3H, s), 3.69 (3H, s), 3.35 (2H, s), 2.67 (1H, m), 2.42 (1H, ddd,  $J = 17.7, 8.9, 6.6$  Hz), 2.36 (1H, ddd,  $J = 17.7, 8.9, 5.7$  Hz), 1.94-1.78 (2H, m), 1.24 (3H, d,  $J = 6.9$  Hz) ppm;  $^{13}\text{C}$  NMR ( $\text{CDCl}_3$ ):  $\delta$  202.7, 167.6, 159.8, 148.0, 129.5, 119.4, 113.0, 111.3, 55.1, 52.3, 49.0, 41.2, 39.2, 31.5, 22.4 ppm; HRMS ( $m/z$ ) for  $\text{C}_{15}\text{H}_{20}\text{O}_4(\text{Na}^+)$ : calculated 287.1259, found 287.1242.

**Methyl 6-(4-acetamidophenyl)-3-oxoheptanoate (1d)**: colorless oil; 90% yield (1.58 mmol scale); IR (ATR):  $\nu$  3303, 2956, 1745, 1712, 1666, 1602, 1532, 1516, 1437, 1412, 1371, 1316, 1260, 1221, 1183, 1015, 913, 837  $\text{cm}^{-1}$ ;  $^1\text{H}$  NMR ( $\text{CDCl}_3$ ):  $\delta$  7.41 (2H, d,  $J = 8.4$  Hz), 7.16 (1H, br s), 7.11 (2H, d,  $J = 8.4$  Hz), 3.70 (3H, s), 3.35 (2H, s), 2.67 (1H, m), 2.43 (1H, ddd,  $J = 17.7, 8.8, 6.5$  Hz), 2.35 (1H, ddd,  $J = 17.7, 8.8, 5.7$  Hz), 2.16 (3H, s), 1.92 (1H, m), 1.80 (1H, m), 1.23 (3H, d,  $J = 6.9$  Hz) ppm;  $^{13}\text{C}$  NMR ( $\text{CDCl}_3$ ):  $\delta$  202.6, 168.2, 167.6, 142.3, 136.0, 127.5, 120.2, 52.3, 49.0, 41.2, 38.6, 31.5, 24.5, 22.4 ppm; HRMS ( $m/z$ ) for  $\text{C}_{16}\text{H}_{21}\text{NO}_4(\text{Na}^+)$ : calculated 314.1368, found 314.1349.

**Methyl 6-(benzofuran-5-yl)-3-oxoheptanoate (1e):** colorless oil; 62% yield (1.95 mmol scale); IR (ATR):  $\nu$  2955, 1746, 1714, 1469, 1438, 1407, 1320, 1196, 1154, 1131, 1111, 1031, 880, 816, 771, 742  $\text{cm}^{-1}$ ;  $^1\text{H}$  NMR ( $\text{CDCl}_3$ ):  $\delta$  7.60 (1H, d,  $J = 2.2$  Hz), 7.42 (1H, d,  $J = 8.5$  Hz), 7.37 (1H, d,  $J = 1.8$  Hz), 7.09 (1H, dd,  $J = 8.5, 1.8$  Hz), 6.72 (1H, dd,  $J = 2.2, 0.9$  Hz), 3.68 (3H, s), 3.34 (2H, s), 2.80 (1H, m), 2.44 (1H, ddd,  $J = 17.7, 9.1, 6.5$  Hz), 2.36 (1H, ddd,  $J = 17.7, 8.9, 5.5$  Hz), 1.98 (1H, m), 1.88 (1H, m), 1.30 (3H, d,  $J = 6.9$  Hz) ppm;  $^{13}\text{C}$  NMR ( $\text{CDCl}_3$ ):  $\delta$  202.7, 167.6, 153.8, 145.2, 140.7, 127.6, 123.4, 119.1, 111.3, 106.5, 52.3, 49.0, 41.3, 39.1, 31.9, 23.1 ppm; HRMS ( $m/z$ ) for  $\text{C}_{16}\text{H}_{18}\text{O}_4(\text{Na}^+)$ : calculated 297.1103, found 297.1098.

**Methyl 6-(2,4-dimethoxyphenyl)-3-oxoheptanoate (1f):** colorless oil; 91% yield (0.93 mmol scale); IR (ATR):  $\nu$  2954, 1746, 1714, 1610, 1586, 1505, 1455, 1438, 1415, 1290, 1260, 1207, 1156, 1036  $\text{cm}^{-1}$ ;  $^1\text{H}$  NMR ( $\text{CDCl}_3$ ):  $\delta$  7.03 (1H, d,  $J = 8.2$  Hz), 6.46 (1H, dd,  $J = 8.2, 2.4$  Hz), 6.44 (1H, d,  $J = 2.4$  Hz), 3.79 (3H, s), 3.78 (3H, s), 3.70 (3H, s), 3.37 (2H, s), 3.09 (1H, m), 2.44 (1H, ddd,  $J = 17.3, 9.2, 6.5$  Hz), 2.35 (1H, ddd,  $J = 17.3, 9.0, 5.7$  Hz), 1.91-1.78 (2H, m), 1.19 (3H, d,  $J = 7.0$  Hz) ppm;  $^{13}\text{C}$  NMR ( $\text{CDCl}_3$ ):  $\delta$  203.0, 167.7, 159.0, 158.0, 127.2, 126.7, 104.3, 98.6, 55.3 (2C), 52.3, 49.0, 41.3, 30.9, 30.8, 21.1 ppm; HRMS ( $m/z$ ) for  $\text{C}_{16}\text{H}_{22}\text{O}_5(\text{Na}^+)$ : calculated 317.1365, found 317.1340.

**Methyl 6-(3,4-dimethoxyphenyl)-3-oxoheptanoate (1g):** colorless oil; 80% yield (0.95 mmol scale); IR (ATR):  $\nu$  2953, 1745, 1714, 1517, 1454, 1418, 1319, 1258, 1144, 1028,  $\text{cm}^{-1}$ ;  $^1\text{H}$  NMR ( $\text{CDCl}_3$ ):  $\delta$  6.80 (1H, d,  $J = 8.0$  Hz), 6.70-6.67 (2H, m), 3.88 (3H, s), 3.86 (3H, s), 3.70 (3H, s), 3.36 (2H, s), 2.64 (1H, m), 2.43 (1H, ddd,  $J = 17.7, 8.8, 6.6$  Hz), 2.37 (1H, ddd,  $J = 17.7, 8.7, 5.6$  Hz), 1.91 (1H, m), 1.80 (1H, m), 1.24 (3H, d,  $J = 6.9$  Hz) ppm;  $^{13}\text{C}$  NMR ( $\text{CDCl}_3$ ):  $\delta$  202.7, 167.6, 149.0, 147.4, 138.9, 118.8, 111.2, 110.2, 55.9, 55.9, 52.3, 49.1, 41.2, 38.8, 31.7, 22.6 ppm; HRMS ( $m/z$ ) for  $\text{C}_{16}\text{H}_{22}\text{O}_5(\text{Na}^+)$ : calculated 317.1365, found 317.1339.

**Methyl 6-(2,5-dimethoxyphenyl)-3-oxoheptanoate (1h):** colorless oil; 92% yield (0.93 mmol scale); IR (ATR):  $\nu$  2962, 1746, 1705, 1497, 1439, 1409, 1375, 1315, 1273, 1214, 1177, 1116, 1086, 1034, 1009, 867, 837, 803  $\text{cm}^{-1}$ ;  $^1\text{H}$  NMR ( $\text{CDCl}_3$ ):  $\delta$  6.78 (1H, d,  $J = 8.8$  Hz), 6.72 (1H, d,  $J = 3.0$  Hz), 6.69 (1H, dd,  $J = 8.8, 3.0$  Hz), 3.78 (6H, s), 3.70 (3H, s), 3.37 (2H, s), 3.16 (1H, m), 2.45 (1H, ddd,  $J = 17.5, 9.1, 6.5$  Hz), 2.36 (1H, ddd,  $J = 17.5, 9.0, 5.6$  Hz), 1.89 (1H, m), 1.82 (1H, m), 1.20 (3H, d,  $J = 7.0$  Hz) ppm;  $^{13}\text{C}$  NMR ( $\text{CDCl}_3$ ):  $\delta$  202.8, 167.7, 153.9, 151.4, 135.8, 113.6, 111.6, 110.7, 56.1, 55.6, 52.2, 49.0, 41.2, 31.4, 30.7, 20.9 ppm; HRMS ( $m/z$ ) for  $\text{C}_{16}\text{H}_{22}\text{O}_5(\text{Na}^+)$ : calculated 317.1365, found 317.1336.

**Methyl 3-oxo-6-phenylheptanoate (1i):** colorless oil; 96% yield (8.00 mmol scale); IR (ATR):  $\nu$  2955, 1746, 1714, 1651, 1494, 1452, 1437, 1407, 1318, 1246, 1193, 1015, 912, 763, 703  $\text{cm}^{-1}$ ;  $^1\text{H}$  NMR ( $\text{CDCl}_3$ ):  $\delta$  7.31-7.15 (5H, m), 3.70 (3H, s), 3.35 (2H, s), 2.69 (1H, m), 2.43 (1H, ddd,  $J = 17.7, 9.1, 6.5$  Hz), 2.36 (1H, ddd,  $J = 17.7, 8.9, 5.7$  Hz), 1.93 (1H, m), 1.85 (1H, m), 1.26 (3H, d,  $J = 6.9$  Hz) ppm;  $^{13}\text{C}$  NMR ( $\text{CDCl}_3$ ):  $\delta$  202.5, 167.6, 146.2,

128.5, 127.0, 126.3, 52.3, 49.0, 41.2, 39.2, 31.5, 22.4 ppm; HRMS ( $m/z$ ) for  $C_{14}H_{18}O_3(Na^+)$ : calculated 257.1154, found 257.1164.

**Methyl 3-oxo-6-(*p*-tolyl)heptanoate (1j)**: colorless oil; 91% yield (0.90 mmol scale); IR (ATR):  $\nu$  2954, 1747, 1715, 1515, 1436, 1318, 1241, 1194, 818  $cm^{-1}$ ;  $^1H$  NMR ( $CDCl_3$ ):  $\delta$  7.10 (2H, d,  $J = 8.0$  Hz), 7.04 (2H, d,  $J = 8.0$  Hz), 3.70 (3H, s), 3.35 (2H, s), 2.66 (1H, m), 2.43 (1H, ddd,  $J = 17.7, 9.5, 6.1$  Hz), 2.36 (1H, ddd,  $J = 17.7, 9.0, 5.7$  Hz), 2.32 (3H, s), 1.92 (1H, m), 1.82 (1H, m), 1.24 (3H, d,  $J = 7.0$  Hz) ppm;  $^{13}C$  NMR ( $CDCl_3$ ):  $\delta$  202.7, 167.6, 143.1, 135.7, 129.2, 126.9, 52.3, 49.0, 41.3, 38.8, 31.6, 22.6, 21.0 ppm; HRMS ( $m/z$ ) for  $C_{15}H_{20}O_3(Na^+)$ : calculated 271.1310, found 271.1316.

**Methyl 6-(naphthalen-2-yl)-3-oxoheptanoate (1k)**: colorless oil; 84% yield (1.64 mmol scale); IR (ATR):  $\nu$  3049, 2954, 1746, 1714, 1631, 1600, 1436, 1406, 1365, 1320, 1269, 1202, 1175, 858, 822, 750  $cm^{-1}$ ;  $^1H$  NMR ( $CDCl_3$ ):  $\delta$  7.82-7.78 (3H, m), 7.59 (1H, br s), 7.45 (2H, m), 7.32 (1H, dd,  $J = 8.5, 1.4$  Hz), 3.66 (3H, s), 3.34 (2H, s), 2.88 (1H, m), 2.46 (1H, ddd,  $J = 17.8, 9.1, 6.5$  Hz), 2.38 (1H, ddd,  $J = 17.8, 8.9, 5.6$  Hz), 2.06-1.91 (2H, m), 1.35 (3H, d,  $J = 6.9$  Hz) ppm;  $^{13}C$  NMR ( $CDCl_3$ ):  $\delta$  202.6, 167.6, 143.6, 133.6, 132.3, 128.3, 127.6, 127.6, 126.0, 125.4, 125.4, 125.3, 52.3, 49.0, 41.3, 39.3, 31.3, 22.5 ppm; HRMS ( $m/z$ ) for  $C_{18}H_{20}O_3(Na^+)$ : calculated 307.1310, found 307.1282.

**Methyl 6-(4-methoxy-3-methylphenyl)-3-oxoheptanoate (1l)**: colorless oil; 95% yield (3.86 mmol scale); IR (ATR):  $\nu$  2952, 1747, 1714, 1505, 1438, 1306, 1252, 1136, 1033  $cm^{-1}$ ;  $^1H$  NMR ( $CDCl_3$ ):  $\delta$  6.94 (2H, m), 6.75 (1H, d,  $J = 7.9$  Hz), 3.81 (3H, s), 3.70 (3H, s), 3.36 (2H, s), 2.60 (1H, m), 2.42 (1H, ddd,  $J = 17.6, 9.2, 6.5$  Hz), 2.36 (1H, ddd,  $J = 17.6, 8.9, 5.7$  Hz), 2.20 (3H, s), 1.90 (1H, m), 1.79 (1H, m), 1.22 (3H, d,  $J = 6.9$  Hz) ppm;  $^{13}C$  NMR ( $CDCl_3$ ):  $\delta$  202.8, 167.6, 156.2, 137.8, 129.3, 126.6, 125.0, 110.0, 55.4, 52.3, 49.0, 41.4, 38.4, 31.7, 22.7, 16.3 ppm; HRMS ( $m/z$ ) for  $C_{16}H_{22}O_4(Na^+)$ : calculated 301.1416, found 301.1390. Its NMR spectra were identical with those reported previously.<sup>1</sup>

**Methyl 6-(2,5-dimethoxy-4-methylphenyl)-3-oxoheptanoate (1m)**: colorless oil; 94% yield (0.90 mmol scale); IR (ATR):  $\nu$  2952, 1746, 1714, 1504, 1464, 1399, 1316, 1241, 1208, 1046  $cm^{-1}$ ;  $^1H$  NMR ( $CDCl_3$ ):  $\delta$  6.68 (1H, m), 6.62 (1H, s), 3.78 (3H, s), 3.75 (3H, s), 3.70 (3H, s), 3.37 (2H, s), 3.14 (1H, m), 2.47 (1H, ddd,  $J = 17.5, 9.2, 6.5$  Hz), 2.36 (1H, ddd,  $J = 17.5, 9.0, 5.5$  Hz), 2.20 (3H, s), 1.90 (1H, m), 1.82 (1H, m), 1.21 (3H, d,  $J = 7.0$  Hz) ppm;  $^{13}C$  NMR ( $CDCl_3$ ):  $\delta$  202.9, 167.7, 152.0, 150.8, 132.3, 124.8, 114.3, 109.7, 56.3, 56.2, 52.2, 49.0, 41.3, 31.4, 30.8, 21.2, 16.1 ppm; HRMS ( $m/z$ ) for  $C_{17}H_{24}O_5(Na^+)$ : calculated 331.1521, found 331.1513

**Methyl 6-(3-methoxy-4-methylphenyl)-3-oxoheptanoate (1n)**: colorless oil; 83% yield (0.80 mmol scale); IR (ATR):  $\nu$  2953, 1747, 1715, 1612, 1581, 1506, 1455, 1414, 1312, 1255, 1163, 1135, 1039  $cm^{-1}$ ;  $^1H$  NMR

(CDCl<sub>3</sub>): δ 7.05 (1H, d, *J* = 7.5 Hz), 6.65 (1H, dd, *J* = 7.5, 1.6 Hz), 6.62 (1H, d, *J* = 1.6 Hz), 3.82 (3H, s), 3.70 (3H, s), 3.36 (2H, s), 2.66 (1H, m), 2.44 (1H, ddd, *J* = 17.7, 8.9, 6.6 Hz), 2.38 (1H, ddd, *J* = 17.7, 8.8, 5.7 Hz), 2.18 (3H, s), 1.93 (1H, m), 1.83 (1H, m), 1.25 (3H, d, *J* = 6.9 Hz) ppm; <sup>13</sup>C NMR (CDCl<sub>3</sub>): δ 202.7, 167.6, 157.8, 145.2, 130.6, 124.4, 118.6, 108.8, 55.3, 52.3, 49.1, 41.3, 39.2, 31.6, 22.6, 15.8 ppm; HRMS (*m/z*) for C<sub>16</sub>H<sub>22</sub>O<sub>4</sub>(Na<sup>+</sup>): calculated 301.1416, found 301.1395

### 3-2. Dehydrogenative O-alkylation to 2a and Lewis acid-catalyzed [1,3]-rearrangement to 3a

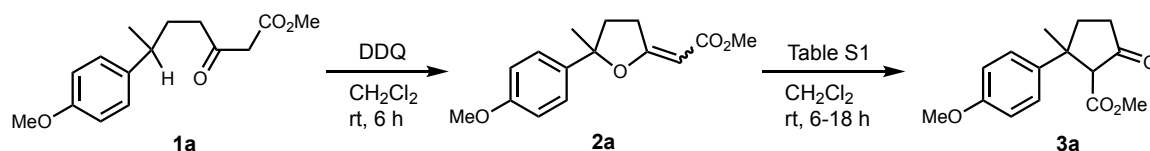

**Scheme S3. Dehydrogenative O-alkylation to 2a and Lewis acid-catalyzed [1,3]-rearrangement to 3a**

#### Methyl 2-(5-(4-methoxyphenyl)-5-methyldihydrofuran-2(3H)-ylidene)acetate (2a)

Methyl 6-(4-methoxyphenyl)-3-oxoheptanoate (**1a**) (26.4 mg, 0.10 mmol) was dissolved in CH<sub>2</sub>Cl<sub>2</sub> (1.0 mL) and DDQ (34.0 mg, 0.15 mmol) was added to the solution. The reaction was stirred under an argon atmosphere at room temperature for 6 hours. The reaction was quenched by addition of ascorbic acid (35.2 mg, 0.20 mmol), water (1 mL) and saturated NaHCO<sub>3</sub> aq. (4 mL). The organic layer was separated and the aqueous layer was extracted with CH<sub>2</sub>Cl<sub>2</sub> (2 mL×3). The combined organic layer was washed with brine, dried over Na<sub>2</sub>SO<sub>4</sub> and filtered through a cotton plug. The filtrate was concentrated in vacuo and the residue was purified by preparative thin layer chromatography with hexane/EtOAc (5/1) to give methyl 2-(5-(4-methoxyphenyl)-5-methyldihydrofuran-2(3H)-ylidene)acetate (**2a**).

(*E*)-**2a**: colorless oil; 18.0 mg, 69% yield; IR (ATR): ν 2947, 1705, 1642, 1514, 1435, 1359, 1303, 1248, 1181, 1118, 1075, 1038, 948, 832 cm<sup>-1</sup>; <sup>1</sup>H NMR (CDCl<sub>3</sub>): δ 7.24 (2H, d, *J* = 8.9 Hz), 6.87 (2H, d, *J* = 8.9 Hz), 5.42 (1H, dd, *J* = 1.9, 1.7 Hz), 3.79 (3H, s), 3.66 (3H, s), 3.28 (1H, dddd, *J* = 18.5, 8.8, 5.2, 1.7 Hz), 2.98 (1H, dddd, *J* = 18.5, 8.8, 8.2, 1.9 Hz), 2.32 (1H, ddd, *J* = 12.4, 8.8, 5.2 Hz), 2.19 (1H, ddd, *J* = 12.4, 8.8, 8.2 Hz), 1.65 (3H, s) ppm; <sup>13</sup>C NMR (CDCl<sub>3</sub>): δ 176.1, 169.1, 158.8, 136.8, 125.6, 113.8, 89.9, 89.4, 55.3, 50.6, 37.4, 30.6, 28.5 ppm; HRMS (*m/z*) for C<sub>15</sub>H<sub>18</sub>O<sub>4</sub>(Na<sup>+</sup>): calculated 285.1102, found 285.1130.

(*Z*)-**2a**: colorless oil; 1.4 mg, 5% yield; IR (ATR): ν 2947, 1712, 1646, 1613, 1514, 1436, 1375, 1298, 1249, 1229, 1168, 1146, 1076, 1036, 964, 902, 834 cm<sup>-1</sup>; <sup>1</sup>H NMR (CDCl<sub>3</sub>): δ 7.31 (2H, d, *J* = 8.8 Hz), 6.87 (2H, d, *J* = 8.8 Hz), 4.88 (1H, dd, *J* = 1.4, 1.1 Hz), 3.80 (3H, s), 3.71 (3H, s), 2.77 (1H, dddd, *J* = 16.9, 8.5, 5.0, 1.1 Hz), 2.61 (1H, dddd, *J* = 16.9, 8.6, 8.3, 1.4 Hz), 2.29 (1H, ddd, *J* = 12.2, 8.3, 5.0 Hz), 2.16 (1H, ddd, *J* = 12.2, 8.6, 8.5 Hz), 1.72 (3H, s) ppm; <sup>13</sup>C NMR (CDCl<sub>3</sub>): δ 171.4, 166.4, 158.8, 136.9, 125.6, 113.8, 92.6, 88.0, 55.3, 50.7, 36.6, 32.0, 29.1 ppm; HRMS (*m/z*) for C<sub>15</sub>H<sub>18</sub>O<sub>4</sub>(Na<sup>+</sup>): calculated 285.1102, found 285.1086.

#### General procedure of Lewis acid-catalyzed [1,3]-rearrangement from 2a to 3a

Methyl 2-(5-(4-methoxyphenyl)-5-methyldihydrofuran-2(3H)-ylidene)acetate (**2a**) (10.0 mg, 0.038 mmol) was dissolved in CH<sub>2</sub>Cl<sub>2</sub> (1.0 mL) and acid catalyst (30-100 mol%) was added to the solution. The reaction was stirred under an argon atmosphere for 6-18 hours at room temperature. The reaction was quenched by addition of saturated NaHCO<sub>3</sub> aq. (2 mL). The organic layer was separated and the aqueous layer was extracted with CH<sub>2</sub>Cl<sub>2</sub> (2 mL×3). The combined organic layer was washed with brine, dried over Na<sub>2</sub>SO<sub>4</sub> and filtered through a cotton plug. The filtrate was concentrated in vacuo and the residue was purified by preparative thin layer chromatography with hexane/EtOAc (5/1) to give methyl 2-(4-methoxyphenyl)-2-methyl-5-oxocyclopentane-1-carboxylate (**3a**). Since **3a** was a mixture of keto and enol forms (keto/enol = 2.3/1) as well as the diastereomers in keto forms judged by <sup>1</sup>H NMR, the structure was fully identified after conversion to a ketone **10** by dealkoxycarboxylation (see section 3-5 in S17).

### 3-3. General procedure of dehydrogenative O-alkylation of **1** to **2**

Methyl 6-aryl-3-oxoheptanoate (**1**) (0.10 mmol) was dissolved in CH<sub>2</sub>Cl<sub>2</sub> (1.0 mL) and DDQ (34.0 mg, 0.15 mmol) was added to the solution. The reaction was stirred under an argon atmosphere at room temperature for 6-24 hours. The reaction was quenched by addition of ascorbic acid (35.2 mg, 0.20 mmol), water (1 mL) and saturated NaHCO<sub>3</sub> aq. (4 mL). The organic layer was separated and the aqueous layer was extracted with CH<sub>2</sub>Cl<sub>2</sub> (2 mL×3). The combined organic layer was washed with brine, dried over Na<sub>2</sub>SO<sub>4</sub> and filtered through a cotton plug. The filtrate was concentrated in vacuo and the residue was purified by preparative thin layer chromatography with hexane/EtOAc to give methyl 2-(5-aryl-5-methyldihydrofuran-2(3H)-ylidene)acetate (**2**)

#### Methyl 2-(5-(4-acetamidophenyl)-5-methyldihydrofuran-2(3H)-ylidene)acetate (**2d**)

(*E*)-**2d**: colorless oil; 15.6 mg, 54% yield; IR (ATR):  $\nu$  3309, 2978, 2947, 1667, 1637, 1603, 1533, 1436, 1406, 1360, 1317, 1258, 1187, 1117, 1073, 1041, 948 cm<sup>-1</sup>; <sup>1</sup>H NMR (CDCl<sub>3</sub>):  $\delta$  7.46 (2H, d, *J* = 8.6 Hz), 7.27 (2H, d, *J* = 8.6 Hz), 5.43 (1H, br s), 3.67 (3H, s), 3.28 (1H, dddd, *J* = 18.5, 8.7, 5.2, 1.6 Hz), 2.95 (1H, dddd, *J* = 18.5, 8.8, 8.4, 1.8 Hz), 2.32 (1H, ddd, *J* = 12.5, 8.8, 5.2 Hz), 2.19 (1H, ddd, *J* = 12.5, 8.7, 8.4 Hz), 2.18 (3H, s) ppm; <sup>13</sup>C NMR (CDCl<sub>3</sub>):  $\delta$  176.0, 169.1, 168.5, 140.6, 137.2, 125.0, 119.9, 89.9, 89.6, 50.7, 37.4, 30.5, 28.4, 24.5 ppm; HRMS (*m/z*) for C<sub>16</sub>H<sub>19</sub>NO<sub>4</sub>(Na<sup>+</sup>): calculated 312.1212, found 312.1190.

(*Z*)-**2d**: colorless oil; 1.7 mg, 6% yield; <sup>1</sup>H NMR (CDCl<sub>3</sub>):  $\delta$  7.45 (2H, d, *J* = 8.5 Hz), 7.32 (2H, d, *J* = 8.5 Hz), 4.89 (1H, br s), 3.71 (3H, s), 2.77 (1H, ddd, *J* = 16.9, 8.5, 5.0 Hz), 2.60 (1H, dddd, *J* = 16.9, 8.4, 8.3, 1.3 Hz), 2.28 (1H, ddd, *J* = 12.2, 8.3, 5.0 Hz), 2.17 (1H, m), 2.17 (3H, s), 1.70 (3H, s) ppm; HRMS (*m/z*) for C<sub>16</sub>H<sub>19</sub>NO<sub>4</sub>(Na<sup>+</sup>): calculated 312.1212, found 312.1192.

#### Methyl 2-(5-(benzofuran-5-yl)-5-methyldihydrofuran-2(3H)-ylidene)acetate (**2e**)

(*E*)-**2e**: colorless oil; 8.4 mg, 31% yield; IR (ATR):  $\nu$  2977, 2947, 1704, 1642, 1469, 1436, 1360, 1266, 1189, 1120, 1087, 1040, 950, 885, 822, 773 cm<sup>-1</sup>; <sup>1</sup>H NMR (CDCl<sub>3</sub>):  $\delta$  7.56 (1H, d, *J* = 2.2 Hz), 7.50 (1H, d, *J* = 1.8

Hz), 7.40 (1H, d,  $J = 8.7$  Hz), 7.18 (1H, dd,  $J = 8.7, 1.8$  Hz), 6.69 (1H, dd,  $J = 2.2, 1.0$  Hz), 5.40 (1H, dd,  $J = 1.9, 1.6$  Hz), 3.60 (3H, s), 3.24 (1H, dddd,  $J = 18.5, 8.7, 5.2, 1.6$  Hz), 2.91 (1H, dddd,  $J = 18.5, 8.7, 8.4, 1.9$  Hz), 2.34 (1H, ddd,  $J = 12.4, 8.7, 5.2$  Hz), 2.20 (1H, ddd,  $J = 12.4, 8.7, 8.4$  Hz), 1.65 (3H, s) ppm;  $^{13}\text{C}$  NMR ( $\text{CDCl}_3$ ):  $\delta$  176.0, 169.1, 154.1, 145.7, 139.5, 127.4, 120.9, 116.9, 111.3, 106.7, 90.3, 89.6, 50.7, 37.8, 30.5, 29.0 ppm; HRMS ( $m/z$ ) for  $\text{C}_{16}\text{H}_{16}\text{O}_4(\text{Na}^+)$ : calculated 295.0946, found 295.0945.

(*Z*)-**2e**: colorless oil; 0.8 mg, 3% yield;  $^1\text{H}$  NMR ( $\text{CDCl}_3$ ):  $\delta$  7.67 (1H, d,  $J = 1.8$  Hz), 7.62 (1H, d,  $J = 2.2$  Hz), 7.47 (1H, d,  $J = 8.6$  Hz), 7.31 (1H, dd,  $J = 8.6, 1.8$  Hz), 6.77 (1H, br s), 4.91 (1H, br s), 3.73 (3H, s), 2.79 (1H, ddd,  $J = 16.9, 8.5, 5.0$  Hz), 2.62 (1H, ddd,  $J = 16.9, 8.4, 8.3$  Hz), 2.37 (1H, ddd,  $J = 12.2, 8.3, 5.0$  Hz), 2.24 (1H, ddd,  $J = 12.2, 8.5, 8.4$  Hz), 1.78 (3H, s) ppm; HRMS ( $m/z$ ) for  $\text{C}_{16}\text{H}_{16}\text{O}_4(\text{Na}^+)$ : calculated 295.0946, found 295.0938.

#### **Methyl 2-(5-(2,4-dimethoxyphenyl)-5-methyldihydrofuran-2(3H)-ylidene)acetate (2f)**

(*E*)-**2f**: colorless oil; 10.5 mg, 35% yield; IR (ATR):  $\nu$  2943, 1705, 1641, 1614, 1584, 1504, 1456, 1436, 1416, 1360, 1315, 1285, 1259, 1208, 1161, 1119, 1069, 1040, 949, 876, 827  $\text{cm}^{-1}$ ;  $^1\text{H}$  NMR ( $\text{CDCl}_3$ ):  $\delta$  7.25 (1H, d,  $J = 8.6$  Hz), 6.47 (1H, d,  $J = 2.4$  Hz), 6.43 (1H, dd,  $J = 8.6, 2.4$  Hz), 5.43 (1H, br), 3.82 (3H, s), 3.79 (3H, s), 3.66 (3H, s), 3.24 (1H, dddd,  $J = 18.5, 8.7, 5.0, 1.5$  Hz), 2.78 (1H, dddd,  $J = 18.5, 9.0, 8.7, 1.9$  Hz), 2.47 (1H, ddd,  $J = 12.7, 9.0, 5.0$  Hz), 2.20 (1H, ddd,  $J = 12.7, 8.7, 8.7$  Hz), 1.66 (3H, s) ppm;  $^{13}\text{C}$  NMR ( $\text{CDCl}_3$ ):  $\delta$  176.6, 169.2, 160.3, 156.3, 126.1, 125.1, 103.6, 99.4, 89.7, 89.0, 55.4, 55.2, 50.6, 35.6, 30.7, 26.4 ppm; HRMS ( $m/z$ ) for  $\text{C}_{16}\text{H}_{20}\text{O}_5(\text{Na}^+)$ : calculated 315.1208, found 315.1237

(*Z*)-**2f**: colorless oil; 1.0 mg, 3% yield;  $^1\text{H}$  NMR ( $\text{CDCl}_3$ ):  $\delta$  7.48 (1H, d,  $J = 9.1$  Hz), 6.47-6.45 (2H, m,  $J = 2.4$  Hz), 4.86 (1H, dd,  $J = 1.3, 1.1$  Hz), 3.81 (3H, s), 3.79 (3H, s), 3.72 (3H, s), 2.74 (1H, dddd,  $J = 16.8, 8.8, 5.4, 1.1$  Hz), 2.55 (1H, dddd,  $J = 16.8, 8.5, 8.4, 1.3$  Hz), 2.43 (1H, ddd,  $J = 12.6, 8.4, 5.4$  Hz), 2.18 (1H, ddd,  $J = 12.6, 8.8, 8.5$  Hz), 1.72 (3H, s) ppm; HRMS ( $m/z$ ) for  $\text{C}_{16}\text{H}_{20}\text{O}_5(\text{Na}^+)$ : calculated 315.1208, found 315.1237.

#### **Methyl 2-(5-(3,4-dimethoxyphenyl)-5-methyldihydrofuran-2(3H)-ylidene)acetate (2g)**

(*E*)-**2g**: colorless oil; 23.1 mg, 79% yield; IR (ATR):  $\nu$  2945, 1704, 1640, 1516, 1437, 1410, 1359, 1261, 1225, 1177, 1118, 1091, 1029, 949, 874, 821  $\text{cm}^{-1}$ ;  $^1\text{H}$  NMR ( $\text{CDCl}_3$ ):  $\delta$  6.86-6.82 (3H, m), 6.47 (1H, d,  $J = 2.4$  Hz), 5.43 (1H, br), 3.88 (3H, s), 3.86 (3H, s), 3.67 (3H, s), 3.29 (1H, dddd,  $J = 18.5, 8.6, 5.3, 1.5$  Hz), 2.99 (1H, dddd,  $J = 18.5, 8.8, 8.1, 1.8$  Hz), 2.34 (1H, ddd,  $J = 12.5, 8.8, 5.3$  Hz), 2.19 (1H, ddd,  $J = 12.5, 8.5, 8.1$  Hz), 1.65 (3H, s) ppm;  $^{13}\text{C}$  NMR ( $\text{CDCl}_3$ ):  $\delta$  176.0, 169.0, 148.9, 148.3, 137.4, 116.5, 111.0, 108.1, 89.9, 89.5, 56.0 (2C), 50.7, 37.4, 30.6, 28.5 ppm; HRMS ( $m/z$ ) for  $\text{C}_{16}\text{H}_{20}\text{O}_5(\text{Na}^+)$ : calculated 315.1208, found 315.1216.

(*Z*)-**2g**: colorless oil; 1.7 mg, 6% yield;  $^1\text{H}$  NMR ( $\text{CDCl}_3$ ):  $\delta$  7.00 (1H, d,  $J = 2.1$  Hz), 6.90 (1H, dd,  $J = 8.4, 2.1$  Hz), 6.83 (1H, d,  $J = 8.4$  Hz), 4.88 (1H, dd,  $J = 1.4, 1.1$  Hz), 3.89 (3H, s), 3.87 (3H, s), 3.71 (3H, s), 2.78 (1H, dddd,  $J = 16.9, 8.6, 4.9, 1.1$  Hz), 2.61 (1H, dddd,  $J = 16.9, 8.4, 8.4, 1.4$  Hz), 2.31 (1H, ddd,  $J = 12.3, 8.4, 4.9$  Hz),



2.16 (1H, ddd,  $J = 12.3, 8.6, 8.4$  Hz), 1.73 (3H, s) ppm; HRMS ( $m/z$ ) for  $C_{16}H_{20}O_5(Na^+)$ : calculated 315.1208, found 315.1190.

**Methyl 2-(5-methyl-5-phenyldihydrofuran-2(3H)-ylidene)acetate (2i)**

(*E*)-**2i**: colorless oil; 5.0 mg, 22% yield; IR (ATR):  $\nu$  2948, 1706, 1644, 1469, 1435, 1377, 1359, 1288, 1189, 1119, 1066, 1041, 949, 876, 824, 766, 726, 701  $cm^{-1}$ ;  $^1H$  NMR ( $CDCl_3$ ):  $\delta$  7.36-7.27 (5H, m), 5.44 (1H, br), 3.67 (3H, s), 3.29 (1H, dddd,  $J = 18.5, 8.7, 5.2, 1.6$  Hz), 2.96 (1H, dddd,  $J = 18.5, 8.7, 8.4, 1.8$  Hz), 2.35 (1H, ddd,  $J = 12.4, 8.7, 5.2$  Hz), 2.22 (1H, ddd,  $J = 12.4, 8.7, 8.4$  Hz), 1.67 (3H, s) ppm;  $^{13}C$  NMR ( $CDCl_3$ ):  $\delta$  176.0, 169.1, 144.8, 128.5, 127.3, 124.3, 90.0, 89.6, 50.7, 37.4, 30.5, 28.5 ppm; HRMS ( $m/z$ ) for  $C_{14}H_{16}O_3(Na^+)$ : calculated 255.0997, found 255.1007

(*Z*)-**2i**: colorless oil; 0.7 mg, 3% yield;  $^1H$  NMR ( $CDCl_3$ ):  $\delta$  7.41-7.33 (5H, m), 4.88 (1H, dd,  $J = 1.4, 1.2$  Hz), 3.72 (3H, s), 2.78 (1H, dddd,  $J = 16.8, 8.5, 5.1, 1.2$  Hz), 2.61 (1H, dddd,  $J = 16.8, 8.5, 8.3, 1.4$  Hz), 2.32 (1H, ddd,  $J = 12.3, 8.3, 5.1$  Hz), 2.19 (1H, ddd,  $J = 12.3, 8.5, 8.5$  Hz), 1.74 (3H, s) ppm; HRMS ( $m/z$ ) for  $C_{14}H_{16}O_3(Na^+)$ : calculated 255.0997, found 255.0975.

**Methyl 2-(5-methyl-5-(*p*-tolyl)dihydrofuran-2(3H)-ylidene)acetate (2j)**

(*E*)-**2j**: colorless oil; 7.9 mg, 32% yield; IR (ATR):  $\nu$  2977, 2946, 1706, 1643, 1515, 1435, 1376, 1358, 1314, 1288, 1188, 1117, 1074, 1041, 1020, 949, 876  $cm^{-1}$ ;  $^1H$  NMR ( $CDCl_3$ ):  $\delta$  7.20 (2H, d,  $J = 8.3$  Hz), 7.14 (2H, d,  $J = 8.3$  Hz), 5.43 (1H, dd,  $J = 1.9, 1.6$  Hz), 3.67 (3H, s), 3.28 (1H, dddd,  $J = 18.5, 8.7, 5.2, 1.6$  Hz), 2.96 (1H, dddd,  $J = 18.5, 8.8, 8.5, 1.9$  Hz), 2.33 (1H, ddd,  $J = 12.4, 8.8, 5.2$  Hz), 2.33 (3H, s), 2.20 (1H, ddd,  $J = 12.4, 8.7, 8.5$  Hz), 1.65 (3H, s) ppm;  $^{13}C$  NMR ( $CDCl_3$ ):  $\delta$  176.1, 169.1, 141.8, 137.0, 129.1, 124.2, 90.1, 89.4, 50.6, 37.4, 30.5, 28.5, 21.0 ppm; HRMS ( $m/z$ ) for  $C_{15}H_{18}O_3(Na^+)$ : calculated 269.1154, found 269.1166.

(*Z*)-**2j**: colorless oil; 0.7 mg, 3% yield;  $^1H$  NMR ( $CDCl_3$ ):  $\delta$  7.29 (2H, d,  $J = 8.1$  Hz), 7.15 (2H, d,  $J = 8.1$  Hz), 4.87 (1H, dd,  $J = 1.3, 1.1$  Hz), 3.71 (3H, s), 2.76 (1H, dddd,  $J = 16.9, 8.5, 5.0, 1.1$  Hz), 2.60 (1H, dddd,  $J = 16.9, 8.6, 8.3, 1.3$  Hz), 2.33 (3H, s), 2.30 (1H, ddd,  $J = 12.2, 8.3, 5.0$  Hz), 2.16 (1H, ddd,  $J = 12.2, 8.6, 8.5$  Hz), 1.72 (3H, s) ppm; HRMS ( $m/z$ ) for  $C_{15}H_{18}O_3(Na^+)$ : calculated 269.1154, found 269.1135.

**Methyl (E)-2-(5-methyl-5-(naphthalen-2-yl)dihydrofuran-2(3H)-ylidene)acetate (2k)**

(*E*)-**2k**: colorless oil; 15.9 mg, 56% yield; IR (ATR):  $\nu$  2978, 2947, 1706, 1643, 1435, 1359, 1287, 1191, 1117, 1091, 1042, 947, 822, 771, 749  $cm^{-1}$ ;  $^1H$  NMR ( $CDCl_3$ ):  $\delta$  7.85-7.77 (4H, m), 7.51-7.46 (2H, m), 7.42 (1H, dd,  $J = 8.6, 1.9$  Hz), 5.52 (1H, d,  $J = 1.9, 1.6$  Hz), 3.68 (3H, s), 3.34 (1H, dddd,  $J = 18.4, 8.7, 5.1, 1.6$  Hz), 2.99 (1H, dddd,  $J = 18.4, 8.8, 8.5, 1.9$  Hz), 2.46 (1H, ddd,  $J = 12.5, 8.8, 5.1$  Hz), 2.30 (1H, ddd,  $J = 12.5, 8.7, 8.5$  Hz), 1.76 (3H, s) ppm;  $^{13}C$  NMR ( $CDCl_3$ ):  $\delta$  176.0, 169.1, 142.0, 133.0, 132.5, 128.4, 128.2, 127.6, 126.4, 126.1, 122.8, 122.8, 90.2, 89.7, 50.7, 37.3, 30.5, 28.4 ppm; HRMS ( $m/z$ ) for  $C_{18}H_{28}O_3(Na^+)$ : calculated 305.1154, found 305.1142.

(*Z*)-**2k**: colorless oil; 1.3 mg, 5% yield; <sup>1</sup>H NMR (CDCl<sub>3</sub>): δ 7.86-7.81 (4H, m), 7.50-7.44 (3H, m), 4.92 (1H, br s), 3.75 (3H, s), 2.81 (1H, ddd, *J* = 16.6, 8.7, 4.7 Hz), 2.64 (1H, ddd, *J* = 16.6, 8.4, 8.3 Hz), 2.43 (1H, ddd, *J* = 12.3, 8.3, 4.7 Hz), 2.26 (1H, ddd, *J* = 12.3, 8.7, 8.4 Hz), 1.83 (3H, s) ppm; HRMS (*m/z*) for C<sub>18</sub>H<sub>28</sub>O<sub>3</sub>(Na<sup>+</sup>): calculated 305.1154, found 305.1148.

**Methyl 2-(5-(4-methoxy-3-methylphenyl)-5-methyldihydrofuran-2(3H)-ylidene)acetate (2l).**

(*E*)-**2l**: colorless oil; 22.7 mg, 82% yield; IR (ATR): ν 2975, 2947, 1705, 1642, 155, 1435, 1359, 1249, 1117, 1091, 1037, 949, 873, 820 cm<sup>-1</sup>; <sup>1</sup>H NMR (CDCl<sub>3</sub>): δ 7.11 (1H, dd, *J* = 8.4, 2.3 Hz), 7.07 (1H, d, *J* = 2.3 Hz), 6.77 (1H, d, *J* = 8.4 Hz), 5.42 (1H, d, *J* = 1.9, 1.6 Hz), 3.81 (3H, s), 3.67 (3H, s), 3.28 (1H, dddd, *J* = 18.4, 8.7, 5.2, 1.6 Hz), 2.98 (1H, dddd, *J* = 18.4, 8.8, 8.3, 1.9 Hz), 2.33 (1H, ddd, *J* = 12.5, 8.8, 5.3 Hz), 2.21 (3H, s), 2.17 (1H, ddd, *J* = 12.5, 8.8, 8.3 Hz), 1.64 (3H, s) ppm; <sup>13</sup>C NMR (CDCl<sub>3</sub>): δ 176.2, 169.2, 157.0, 136.3, 126.8, 126.7, 122.7, 109.6, 90.0, 89.3, 55.4, 50.6, 37.4, 30.6, 28.5, 16.4 ppm; HRMS (*m/z*) for C<sub>16</sub>H<sub>20</sub>O<sub>4</sub>(Na<sup>+</sup>): calculated 299.1259, found 299.1237.

(*Z*)-**2l**: colorless oil; 1.5 mg, 5% yield; <sup>1</sup>H NMR (CDCl<sub>3</sub>): δ 7.21 (1H, dd, *J* = 8.5, 2.3 Hz), 7.11 (1H, d, *J* = 2.3 Hz), 6.87 (1H, d, *J* = 8.5 Hz), 4.87 (1H, d, *J* = 1.4, 1.1 Hz), 3.81 (3H, s), 3.71 (3H, s), 2.75 (1H, dddd, *J* = 16.9, 8.5, 4.9, 1.1 Hz), 2.61 (1H, dddd, *J* = 16.9, 8.5, 8.3, 1.4 Hz), 2.29 (1H, ddd, *J* = 12.2, 8.3, 4.9 Hz), 2.22 (3H, s), 2.14 (1H, ddd, *J* = 12.2, 8.5, 8.5 Hz), 1.71 (3H, s) ppm; HRMS (*m/z*) for C<sub>16</sub>H<sub>20</sub>O<sub>4</sub>(Na<sup>+</sup>): calculated 299.1259, found 299.1234.

**Methyl 2-(5-(2,5-dimethoxy-4-methylphenyl)-5-methyldihydrofuran-2(3H)-ylidene)acetate (2m)**

(*E*)-**2m**: colorless oil; 11.1 mg, 36% yield; IR (ATR): ν 2946, 1708, 1643, 154, 1465, 1435, 1396, 1372, 1359, 1277, 1212, 1119, 1088, 1062, 1042, 948, 873, 824, 773 cm<sup>-1</sup>; <sup>1</sup>H NMR (CDCl<sub>3</sub>): δ 6.88 (1H, s), 6.71 (1H, s), 5.46 (1H, br), 3.79 (3H, s), 3.77 (3H, s), 3.67 (3H, s), 3.24 (1H, dddd, *J* = 18.5, 8.8, 5.2, 1.3 Hz), 2.90 (1H, dddd, *J* = 18.5, 9.0, 8.5, 1.7 Hz), 2.48 (1H, ddd, *J* = 12.8, 9.0, 5.2 Hz), 2.25 (1H, ddd, *J* = 12.8, 8.8, 8.5 Hz), 2.20 (3H, s), 1.67 (3H, s) ppm; <sup>13</sup>C NMR (CDCl<sub>3</sub>): δ 176.5, 169.2, 151.4, 148.7, 130.6, 126.3, 114.5, 108.4, 89.8, 89.1, 56.0, 55.7, 50.6, 35.7, 30.7, 26.2, 16.1 ppm; HRMS (*m/z*) for C<sub>17</sub>H<sub>22</sub>O<sub>5</sub>(Na<sup>+</sup>): calculated 329.1365, found 329.1380.

(*Z*)-**2m**: colorless oil; 0.8 mg, 3% yield; <sup>1</sup>H NMR (CDCl<sub>3</sub>): δ 7.21 (1H, s), 6.70 (1H, s), 4.87 (1H, br), 3.79 (3H, s), 3.79 (3H, s), 3.71 (3H, s), 2.75 (1H, dddd, *J* = 16.4, 9.0, 5.2, 1.3 Hz), 2.57-2.44 (2H, m), 2.20 (1H, m), 2.20 (3H, s), 1.74 (3H, s) ppm; HRMS (*m/z*) for C<sub>17</sub>H<sub>22</sub>O<sub>5</sub>(Na<sup>+</sup>): calculated 329.1365, found 329.1381.

**Methyl 2-(5-(3-methoxy-4-methylphenyl)-5-methyldihydrofuran-2(3H)-ylidene)acetate (2n)**

(*E*)-**2n**: colorless oil; 11.3 mg, 41% yield; IR (ATR): ν 2976, 2947, 1706, 1643, 1582, 1506, 1456, 1435, 1406, 1376, 1360, 1313, 1262, 1233, 1188, 1118, 1092, 1040, 950, 875, 822 cm<sup>-1</sup>; <sup>1</sup>H NMR (CDCl<sub>3</sub>): δ 7.08 (1H, d, *J* = 7.5 Hz), 6.79-6.77 (2H, m), 5.44 (1H, dd, *J* = 1.9, 1.6 Hz), 3.83 (3H, s), 3.67 (3H, s), 3.28 (1H, dddd, *J* = 18.5, 8.7,

5.2, 1.6 Hz), 2.97 (1H, dddd,  $J = 18.5, 8.8, 8.4, 1.9$  Hz), 2.35 (1H, ddd,  $J = 12.5, 8.8, 5.2$  Hz), 2.20 (1H, ddd,  $J = 12.5, 8.7, 8.4$  Hz), 2.19 (3H, s), 1.66 (3H, s) ppm;  $^{13}\text{C}$  NMR ( $\text{CDCl}_3$ ):  $\delta$  176.1, 169.1, 157.7, 143.7, 130.5, 125.7, 116.1, 106.2, 90.2, 89.5, 55.3, 50.7, 37.4, 30.6, 28.6, 15.8 ppm; HRMS ( $m/z$ ) for  $\text{C}_{16}\text{H}_{20}\text{O}_4(\text{Na}^+)$ : calculated 299.1259, found 299.1231.

(*Z*)-**2n**: colorless oil; 1.1 mg, 4% yield; IR (ATR):  $^1\text{H}$  NMR ( $\text{CDCl}_3$ ):  $\delta$  7.09 (1H, d,  $J = 7.7$  Hz), 6.96 (1H, d,  $J = 1.7$  Hz), 6.82 (1H, dd,  $J = 7.7, 1.7$  Hz), 4.88 (1H, dd,  $J = 1.4, 1.1$  Hz), 3.83 (3H, s), 3.71 (3H, s), 2.77 (1H, dddd,  $J = 16.9, 8.6, 4.8, 1.1$  Hz), 2.60 (1H, dddd,  $J = 16.9, 8.6, 8.6, 1.4$  Hz), 2.33 (1H, ddd,  $J = 12.2, 8.3, 4.8$  Hz), 2.17-2.13 (1H, m), 2.19 (3H, s), 1.73 (3H, s) ppm; HRMS ( $m/z$ ) for  $\text{C}_{16}\text{H}_{20}\text{O}_4(\text{Na}^+)$ : calculated 299.1259, found 299.1259.

### 3-4. General procedure of [1,3]-rearrangement from **2** to **3**

Methyl 2-(5-aryl-5-methyldihydrofuran-2(3H)-ylidene)acetate (**2**) (0.02-0.10 mmol) was dissolved in  $\text{CH}_2\text{Cl}_2$  (1.0 mL) and  $\text{Sc}(\text{OTf})_3$  (30 mol%) was added to the solution. The reaction was stirred under an argon atmosphere for 2-24 hours at room temperature, 40 °C or 80 °C. The reaction was quenched by addition of saturated  $\text{NaHCO}_3$  aq. (2 mL). The organic layer was separated and the aqueous layer was extracted with  $\text{CH}_2\text{Cl}_2$  (2 mL $\times$ 3). The combined organic layer was washed with brine, dried over  $\text{Na}_2\text{SO}_4$  and filtered through a cotton plug. The filtrate was concentrated in vacuo and the residue was purified by preparative thin layer chromatography with hexane/EtOAc to give methyl 2-aryl-2-methyl-5-oxocyclopentane-1-carboxylate (**3**). Since **3** was a mixture of keto and enol forms as well as the diastereomers in keto forms judged by  $^1\text{H}$  NMR, the structure was fully identified after conversion to a ketone **10** by dealkoxycarboxylation.

**Methyl 2-(4-methoxyphenyl)-2-methyl-5-oxocyclopentane-1-carboxylate (3a)** (keto/enol = 2.3/1, *dr* of keto forms = 1.3/1 judged by  $^1\text{H}$  NMR): colorless oil; 86% yield (0.10 mmol scale); HRMS ( $m/z$ ) for  $\text{C}_{15}\text{H}_{18}\text{O}_4(\text{Na}^+)$ : calculated 285.1103, found 285.1086.

**Methyl 2-(4-acetamidophenyl)-2-methyl-5-oxocyclopentane-1-carboxylate (3d)** (keto/enol = 2.1/1, *dr* of keto forms = 1.5/1 judged by  $^1\text{H}$  NMR): colorless oil; 78% yield (0.07 mmol scale); HRMS ( $m/z$ ) for  $\text{C}_{16}\text{H}_{19}\text{NO}_4(\text{Na}^+)$ : calculated 312.1212, found 312.1187.

**Methyl 2-(benzofuran-5-yl)-2-methyl-5-oxocyclopentane-1-carboxylate (3e)** (keto/enol = 1.8/1, *dr* of keto forms = 1.2/1 judged by  $^1\text{H}$  NMR): colorless oil; 85% yield (0.04 mmol scale); HRMS ( $m/z$ ) for  $\text{C}_{16}\text{H}_{16}\text{O}_4(\text{Na}^+)$ : calculated 295.0946, found 295.0929.

**Methyl 2-(2,4-dimethoxyphenyl)-2-methyl-5-oxocyclopentane-1-carboxylate (3f)** (keto/enol = 7.1/1, *dr* of keto forms = 1.9/1 judged by <sup>1</sup>H NMR): colorless oil; 84% yield (0.03 mmol scale); HRMS (*m/z*) for C<sub>16</sub>H<sub>20</sub>O<sub>5</sub>(Na<sup>+</sup>): calculated 315.1208, found 315.1220.

**Methyl 2-(3,4-dimethoxyphenyl)-2-methyl-5-oxocyclopentane-1-carboxylate (3g)** (keto/enol = 1.3/1, *dr* of keto forms = 1.3/1 judged by <sup>1</sup>H NMR): colorless oil; 78% yield (0.07 mmol scale); HRMS (*m/z*) for C<sub>16</sub>H<sub>20</sub>O<sub>5</sub>(Na<sup>+</sup>): calculated 315.1208, found 315.1216.

**Methyl 2-methyl-5-oxo-2-phenylcyclopentane-1-carboxylate (3i)** (keto/enol = 2.3/1, *dr* of keto forms = 1.3/1 judged by <sup>1</sup>H NMR): colorless oil; 94% yield (0.04 mmol scale); HRMS (*m/z*) for C<sub>14</sub>H<sub>16</sub>O<sub>3</sub>(Na<sup>+</sup>): calculated 255.0997, found 255.0980.

**Methyl 2-methyl-5-oxo-2-(*p*-tolyl)cyclopentane-1-carboxylate (3j)** (keto/enol = 2.6/1, *dr* of keto forms = 1.1/1 judged by <sup>1</sup>H NMR): colorless oil; 88% yield (0.02 mmol scale); HRMS (*m/z*) for C<sub>15</sub>H<sub>18</sub>O<sub>3</sub>(Na<sup>+</sup>): calculated 269.1154, found 269.1179.

**Methyl 2-methyl-2-(naphthalen-2-yl)-5-oxocyclopentane-1-carboxylate (3k)** (keto/enol = 3.6/1, *dr* of keto forms = 1.0/1 judged by <sup>1</sup>H NMR): colorless oil; 83% yield (0.06 mmol scale); HRMS (*m/z*) for C<sub>18</sub>H<sub>18</sub>O<sub>3</sub>(Na<sup>+</sup>): calculated 305.1154, found 305.1129.

**Methyl 2-(4-methoxy-3-methylphenyl)-2-methyl-5-oxocyclopentane-1-carboxylate (3l)** (keto/enol = 2.5/1, *dr* of keto forms = 1.4/1 judged by <sup>1</sup>H NMR): colorless oil; 82% yield (0.08 mmol scale); HRMS (*m/z*) for C<sub>16</sub>H<sub>20</sub>O<sub>4</sub>(Na<sup>+</sup>): calculated 299.1259, found 299.1255.

**Methyl 2-(2,5-dimethoxy-4-methylphenyl)-2-methyl-5-oxocyclopentane-1-carboxylate (3m)** (keto/enol = 8.8/1, *dr* of keto forms = 1.5/1 judged by <sup>1</sup>H NMR): colorless oil; 86% yield (0.03 mmol scale); HRMS (*m/z*) for C<sub>17</sub>H<sub>22</sub>O<sub>5</sub>(Na<sup>+</sup>): calculated 329.1365, found 329.1365.

**Methyl 2-(3-methoxy-4-methylphenyl)-2-methyl-5-oxocyclopentane-1-carboxylate (3n)** (keto/enol = 2.5/1, *dr* of keto forms = 1.4/1 judged by <sup>1</sup>H NMR): colorless oil; 75% yield (0.05 mmol scale); HRMS (*m/z*) for C<sub>16</sub>H<sub>20</sub>O<sub>4</sub>(Na<sup>+</sup>): calculated 299.1259, found 299.1248.

### 3-5. General procedure of dealkoxycarbonylation of 3 to 10

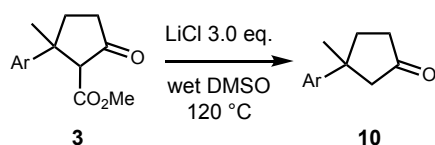

**Scheme S4. Dealkoxycarbonylation of methyl 2-aryl-2-methyl-5-oxocyclopentane-1-carboxylate (3)**

Methyl 2-aryl-2-methyl-5-oxocyclopentane-1-carboxylate (**3**) (0.02-0.06 mmol) was dissolved in DMSO/H<sub>2</sub>O (25/1, 1.0 mL) and LiCl (3.0 eq.) was added to the solution. The reaction was stirred for 16 hours at 120 °C. The reaction was quenched by addition of water (2 mL). The aqueous layer was extracted with EtOAc (2 mL×3). The combined organic layer was washed with water and brine, dried over Na<sub>2</sub>SO<sub>4</sub> and filtered through a cotton plug. The filtrate was concentrated in vacuo and the residue was purified by preparative thin layer chromatography with hexane/EtOAc to 3-aryl-3-methylcyclopentan-1-one (**10**).

**3-(4-Methoxyphenyl)-3-methylcyclopentan-1-one (10a)**: color less oil; 83% yield (0.03 mmol scale); <sup>1</sup>H NMR (CDCl<sub>3</sub>): δ 7.21 (2H, d, *J* = 8.9 Hz), 6.88 (2H, d, *J* = 8.9 Hz), 3.80 (3H, s), 2.62 (1H, d, *J* = 17.6 Hz), 2.43 (1H, d, *J* = 17.6 Hz), 2.44-2.19 (4H, m), 1.37 (3H, s) ppm. Its NMR spectra were identical with those reported previously.<sup>2</sup>

**N-(4-(1-methyl-3-oxocyclopentyl)phenyl)acetamide (10d)**: colorless oil; 90% yield (0.04 mmol scale); IR (ATR): ν 3305, 2956, 1736, 1666, 1601, 1531, 1519, 1405, 1371, 1321, 1264, 1158, 1020, 838 cm<sup>-1</sup>; <sup>1</sup>H NMR (CDCl<sub>3</sub>): δ 7.46 (2H, d, *J* = 8.6 Hz), 7.28 (1H, br s), 7.23 (2H, d, *J* = 8.6 Hz), 2.62 (1H, d, *J* = 17.7 Hz), 2.44 (1H, d, *J* = 17.7 Hz), 2.39-2.20 (4H, m), 2.17 (3H, s), 1.36 (3H, s) ppm; <sup>13</sup>C NMR (CDCl<sub>3</sub>): δ 218.5, 168.3, 144.4, 136.1, 126.1, 120.2, 52.3, 43.5, 36.7, 35.9, 29.4, 24.5 ppm; HRMS (*m/z*) for C<sub>14</sub>H<sub>17</sub>NO<sub>2</sub>(Na<sup>+</sup>): calculated 254.1157, found 254.1187.

**3-(Benzofuran-5-yl)-3-methylcyclopentan-1-one (10e)**: colorless oil; 90% yield (0.04 mmol scale); IR (ATR): ν 2918, 1740, 1684, 1540, 1471, 1404, 1318, 1270, 1167, 1131, 1112, 1029, 811, 771, 741 cm<sup>-1</sup>; <sup>1</sup>H NMR (CDCl<sub>3</sub>): δ 7.62 (1H, d, *J* = 2.2 Hz), 7.49 (1H, d, *J* = 1.9 Hz), 7.47 (1H, d, *J* = 8.6 Hz), 7.24 (1H, dd, *J* = 8.6, 1.9 Hz), 6.75 (1H, dd, *J* = 2.2, 0.9 Hz), 2.72 (1H, d, *J* = 17.4 Hz), 2.55 (1H, d, *J* = 17.4 Hz), 2.52-2.32 (4H, m), 1.43 (3H, s) ppm; <sup>13</sup>C NMR (CDCl<sub>3</sub>): δ 218.6, 153.5, 145.5, 143.2, 127.5, 122.2, 117.7, 111.4, 106.6, 52.8, 43.9, 36.8, 36.3, 30.0 ppm.

**3-(2,4-Dimethoxyphenyl)-3-methylcyclopentan-1-one (10f)**: colorless oil; 89% yield (0.03 mmol scale); IR (ATR): ν 2952, 1739, 1610, 1581, 1505, 1464, 1408, 1308, 1267, 1208, 1160, 1034, 836 cm<sup>-1</sup>; <sup>1</sup>H NMR (CDCl<sub>3</sub>): δ 7.09 (1H, d, *J* = 8.5 Hz), 6.48 (1H, d, *J* = 2.5 Hz), 6.45 (1H, dd, *J* = 8.5, 2.5 Hz), 3.80 (6H, s), 2.63 (1H, d, *J* = 18.1 Hz), 2.58 (1H, d, *J* = 18.1 Hz), 2.41-2.26 (4H, m), 1.36 (3H, s) ppm; <sup>13</sup>C NMR (CDCl<sub>3</sub>): δ 220.2, 160.0, 158.7,

125.7, 126.7, 103.6, 99.5, 55.3, 55.0, 52.5, 42.2, 36.4, 35.1, 26.4 ppm; HRMS ( $m/z$ ) for  $C_{14}H_{18}O_3(Na^+)$ : calculated 257.1154, found 257.1182.

**3-(3,4-Dimethoxyphenyl)-3-methylcyclopentan-1-one (10g)**: colorless oil; 93% yield (0.06 mmol scale); IR (ATR):  $\nu$  2953, 2834, 1738, 1605, 1588, 1519, 1464, 1408, 1328, 1255, 1172, 1146, 1027, 810  $cm^{-1}$ ;  $^1H$  NMR ( $CDCl_3$ ):  $\delta$  6.84-6.80 (3H, m), 3.89 (3H, s), 3.87 (3H, s), 2.64 (1H, d,  $J = 17.6$  Hz), 2.44 (1H, d,  $J = 17.6$  Hz), 2.43-2.20 (4H, m), 1.39 (3H, s) ppm;  $^{13}C$  NMR ( $CDCl_3$ ):  $\delta$  218.5, 149.0, 147.6, 141.1, 117.4, 111.2, 109.3, 56.0, 55.9, 52.5, 43.5, 36.8, 36.2, 29.5 ppm;  $C_{14}H_{18}O_3(Na^+)$ : calculated 257.1154, found 257.1183.

**3-Methyl-3-phenylcyclopentan-1-one (10i)**: colorless oil; 85% yield (0.02 mmol scale);  $^1H$  NMR ( $CDCl_3$ ):  $\delta$  7.36-7.21 (5H, m), 2.66 (1H, d,  $J = 17.6$  Hz), 2.48 (1H, d,  $J = 17.6$  Hz), 2.46-2.26 (4H, m), 1.39 (3H, s) ppm. Its NMR spectra were identical with those reported previously.<sup>3</sup>

**3-Methyl-3-(*p*-tolyl)cyclopentan-1-one (10j)**: colorless oil; 90% yield (0.02 mmol scale);  $^1H$  NMR ( $CDCl_3$ ):  $\delta$  7.18 (2H, d,  $J = 8.3$  Hz), 7.15 (2H, d,  $J = 8.3$  Hz), 2.64 (1H, d,  $J = 17.5$  Hz), 2.45 (1H, d,  $J = 17.5$  Hz), 2.39-2.25 (4H, m), 2.35 (3H, s), 1.37 (3H, s) ppm. Its NMR spectra were identical with those reported previously.<sup>4</sup>

**3-Methyl-3-(naphthalen-2-yl)cyclopentan-1-one (10k)**: colorless oil; 78% yield (0.05 mmol scale); IR (ATR):  $\nu$  3054, 2955, 1739, 1599, 1505, 1451, 1404, 1376, 1316, 1279, 1245, 1152, 857, 820, 748  $cm^{-1}$ ;  $^1H$  NMR ( $CDCl_3$ ):  $\delta$  7.85-7.81 (3H, m), 7.67 (1H, d,  $J = 1.8$  Hz), 7.50-7.44 (3H, m), 2.79 (1H, d,  $J = 17.6$  Hz), 2.57 (1H, d,  $J = 17.6$  Hz), 2.50-2.34 (4H, m), 1.48 (3H, s) ppm;  $^{13}C$  NMR ( $CDCl_3$ ):  $\delta$  218.5, 145.7, 133.3, 132.0, 128.4, 127.9, 127.5, 126.3, 125.8, 124.5, 123.4, 52.3, 44.0, 36.8, 35.9, 29.3 ppm; HRMS ( $m/z$ ) for  $C_{16}H_{16}O(Na^+)$ : calculated 247.1099, found 247.1127.

**3-(4-Methoxy-3-methylphenyl)-3-methylcyclopentan-1-one (10l)**: colorless oil; 90% yield (0.04 mmol scale); IR (ATR):  $\nu$  2948, 1735, 1507, 1461, 1401, 1267, 1249, 1173, 1138, 1029, 884  $cm^{-1}$ ;  $^1H$  NMR ( $CDCl_3$ ):  $\delta$  7.07-7.05 (2H, m), 6.79 (1H, d,  $J = 9.1$  Hz), 3.82 (3H, s), 2.63 (1H, d,  $J = 17.6$  Hz), 2.42 (1H, d,  $J = 17.6$  Hz), 2.44-2.18 (4H, m), 2.23 (3H, s), 1.36 (3H, s) ppm;  $^{13}C$  NMR ( $CDCl_3$ ):  $\delta$  218.6, 157.8, 147.5, 130.6, 124.8, 117.2, 107.5, 55.3, 52.5, 43.8, 36.8, 36.0, 29.4, 15.7 ppm; HRMS ( $m/z$ ) for  $C_{14}H_{18}O_3(Na^+)$ : calculated 241.1205, found 241.1226.

**3-(2,5-Dimethoxy-4-methylphenyl)-3-methylcyclopentan-1-one (6)**: colorless oil; 97% yield (0.03 mmol scale);  $^1H$  NMR ( $CDCl_3$ ):  $\delta$  6.71 (2H, br), 2.66 (1H, d,  $J = 18.1$  Hz), 2.60 (1H, d,  $J = 18.1$  Hz), 2.43-2.29 (4H, m), 2.21 (3H, s), 1.39 (3H, s) ppm. Its NMR spectra were identical with those reported previously.<sup>5</sup>

**3-(3-Methoxy-4-methylphenyl)-3-methylcyclopentan-1-one (10n)**: colorless oil; 72% yield (0.04 mmol scale); IR (ATR):  $\nu$  2953, 1740, 1613, 1577, 1516, 1464, 1404, 1319, 1269, 1248, 1172, 1140, 1039  $\text{cm}^{-1}$ ;  $^1\text{H}$  NMR ( $\text{CDCl}_3$ ):  $\delta$  7.09 (1H, d,  $J = 7.7$  Hz), 6.78 (1H, dd,  $J = 7.7, 1.8$  Hz), 6.74 (1H, d,  $J = 1.8$  Hz), 3.84 (3H, s), 2.66 (1H, d,  $J = 17.5$  Hz), 2.45 (1H, d,  $J = 17.5$  Hz), 2.44-2.24 (4H, m), 2.20 (3H, s), 1.36 (3H, s) ppm;  $^{13}\text{C}$  NMR ( $\text{CDCl}_3$ ):  $\delta$  218.9, 156.2, 140.1, 128.00, 126.6, 123.5, 109.8, 55.4, 52.6, 43.1, 36.8, 36.1, 29.5, 16.4 ppm; HRMS ( $m/z$ ) for  $\text{C}_{14}\text{H}_{18}\text{O}_3(\text{Na}^+)$ : calculated 241.1205, found 241.1233.

### 3-6. One-pot conversion of **11** to **31**

**Method A**: Methyl 6-(4-methoxy-3-methylphenyl)-3-oxoheptanoate (**11**) (27.6 mg, 0.10 mmol) was dissolved in  $\text{CH}_2\text{Cl}_2$  (1.0 mL). DDQ (34.0 mg, 0.15 mmol) and  $\text{Sc}(\text{OTf})_3$  (14.8 mg, 0.030 mmol) were added to the solution. The reaction was stirred under an argon atmosphere at room temperature for 8 hours. The reaction was quenched by addition of ascorbic acid (35.2 mg, 0.20 mmol), water (1 mL) and saturated  $\text{NaHCO}_3$  aq. (4 mL). The organic layer was separated and the aqueous layer was extracted with  $\text{CH}_2\text{Cl}_2$  (2 mL $\times$ 3). The combined organic layer was washed with brine, dried over  $\text{Na}_2\text{SO}_4$  and filtered through a cotton plug. The filtrate was concentrated in vacuo and the residue was purified by preparative thin layer chromatography with hexane/EtOAc (5/1) to give methyl 2-(4-methoxy-3-methylphenyl)-2-methyl-5-oxocyclopentane-1-carboxylate (**31**) (14.4 mg, 52% yield) as a colorless oil. Substrate **11** (5.3 mg, 19% yield) was recovered.

**Method B**: Methyl 6-(4-methoxy-3-methylphenyl)-3-oxoheptanoate (**11**) (27.6 mg, 0.10 mmol) was dissolved in  $\text{CH}_2\text{Cl}_2$  (1.0 mL) and DDQ (34.0 mg, 0.15 mmol) was added to the solution. The reaction was stirred under an argon atmosphere at room temperature. After 6 hours,  $\text{Sc}(\text{OTf})_3$  (14.8 mg, 0.030 mmol) was added to the reaction mixture and the reaction was stirred at room temperature for 2 hours. The reaction was quenched by addition of ascorbic acid (35.2 mg, 0.20 mmol), water (1 mL) and saturated  $\text{NaHCO}_3$  aq. (4 mL). The organic layer was separated and the aqueous layer was extracted with  $\text{CH}_2\text{Cl}_2$  (2 mL $\times$ 3). The combined organic layer was washed with brine, dried over  $\text{Na}_2\text{SO}_4$  and filtered through a cotton plug. The filtrate was concentrated in vacuo and the residue was purified by preparative thin layer chromatography with hexane/EtOAc (5/1) to give methyl 2-(4-methoxy-3-methylphenyl)-2-methyl-5-oxocyclopentane-1-carboxylate (**31**) (17.7 mg, 64% yield) as a colorless oil.

### 3-7. Methylation of **31** to **5**

**( $\pm$ )-Methyl (1*SR*,2*RS*)-2-(4-methoxy-3-methylphenyl)-1,2-dimethyl-5-oxocyclopentane-1-carboxylate (( $\pm$ )-**5**)<sup>1</sup>**

Methyl 2-(4-methoxy-3-methylphenyl)-2-methyl-5-oxocyclopentane-1-carboxylate (**31**) (18.3 mg, 0.066 mmol) was dissolved in acetone (1.0 mL).  $\text{K}_2\text{CO}_3$  (13.8 mg, 0.10 mmol) and MeI (8  $\mu\text{L}$ , 0.128 mmol) were added to the solution. The reaction was stirred at room temperature for 14 hours. The reaction mixture was filtered through Celite<sup>®</sup> pad and washed with EtOAc (5 mL). The filtrate was concentrated in vacuo and the residue was purified

by preparative thin layer chromatography with hexane/EtOAc (5/1) to give ( $\pm$ )-methyl (1*S*,2*R*)-2-(4-methoxy-3-methylphenyl)-1,2-dimethyl-5-oxocyclopentane-1-carboxylate (( $\pm$ )-**5**) (14.0 mg, 73% yield) as a colorless oil;  $^1\text{H}$  NMR ( $\text{CDCl}_3$ ):  $\delta$  7.15 (1H, dd,  $J = 8.5, 2.3$  Hz), 7.13 (1H, d,  $J = 2.3$  Hz), 6.76 (1H, d,  $J = 8.5$  Hz), 3.81 (3H, s), 3.31 (3H, s), 3.03 (1H, m), 2.72 (1H, ddd,  $J = 19.4, 9.4, 1.3$  Hz), 2.48 (1H, ddd,  $J = 19.4, 11.0, 9.0$  Hz), 2.21 (3H, s), 1.97 (1H, ddd,  $J = 12.5, 9.0, 1.3$  Hz), 1.40 (3H, s), 1.28 (3H, s) ppm;  $^{13}\text{C}$  NMR ( $\text{CDCl}_3$ ):  $\delta$  216.2, 171.2, 156.5, 135.8, 128.2, 126.1, 124.1, 109.5, 64.7, 55.2, 51.2, 49.4, 35.8, 31.4, 25.6, 16.5, 14.9 ppm. Its NMR spectra were identical with those reported previously.<sup>1</sup>

### 3-8. [1,3]-Rearrangement of **2I** to **3I** using an asymmetric Cu catalyst (*S,S*)-**4**<sup>6</sup>

#### Preparation of asymmetric Cu catalyst (*S,S*)-**4**<sup>6</sup>

$\text{CuCl}_2$  (13.4 mg, 0.10 mmol),  $\text{AgSbF}_6$  (68.7 mg, 0.20 mmol) and (*S,S*)-(-)-2,2'-Isopropylidenebis(4-*tert*-butyl-2-oxazoline) (29.4 mg, 0.10 mmol) were suspended in  $\text{CH}_2\text{Cl}_2$  (2 mL) under an argon atmosphere. The suspension was stirred in the dark at room temperature. After 14 hours, the suspension was filtered through Celite<sup>®</sup> pad under air and washed with  $\text{CH}_2\text{Cl}_2$  (5 mL). The filtrate was concentrated in vacuo to give (*S,S*)-**4**<sup>6</sup> (78.8 mg, 91%) as a light blue solid.

#### (2*S*)-Methyl 2-(4-methoxy-3-methylphenyl)-2-methyl-5-oxocyclopentane-1-carboxylate ((2*S*)-**3I**)

Methyl 2-(5-(4-methoxy-3-methylphenyl)-5-methyldihydrofuran-2(3H)-ylidene)acetate (**2I**) (27.6 mg, 0.10 mmol) was dissolved in  $\text{CH}_2\text{Cl}_2$  (1.0 mL). Prepared (*S,S*)-**4** (25.9 mg, 0.030 mmol) in  $\text{CH}_2\text{Cl}_2$  (0.3 mL) was added to the solution. The reaction was stirred under an argon atmosphere at room temperature for 24 hours. The reaction was quenched by addition of saturated  $\text{NaHCO}_3$  aq. (2 mL). The organic layer was separated and the aqueous layer was extracted with  $\text{CH}_2\text{Cl}_2$  (2 mL $\times$ 3). The combined organic layer was washed with brine, dried over  $\text{Na}_2\text{SO}_4$  and filtered through a cotton plug. The filtrate was concentrated in vacuo and the residue was purified by preparative thin layer chromatography with hexane/EtOAc (5/1) to give (2*S*)-methyl 2-(4-methoxy-3-methylphenyl)-2-methyl-5-oxocyclopentane-1-carboxylate ((2*S*)-**3I**) (18.0 mg, 65% yield) as a colorless oil.

#### Determination of of enantiomeric excess of enantiomerically enriched **5**

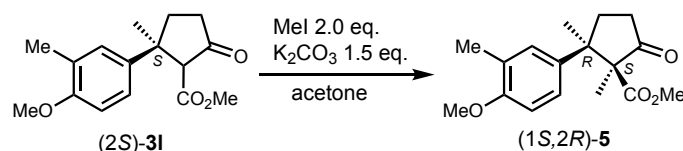

**Scheme S5. Determination of enantiomeric excess of enantiomerically enriched **5****

Enantiomeric excess and absolute configuration of (2*S*)-**3I** were determined after the conversion into methylated product **5**. (2*S*)-**3I** was converted to (1*S*,2*R*)-**5** by following the procedure described for ( $\pm$ )-**3I** to ( $\pm$ )-**5**.  $[\alpha]^{22}_{\text{D}} = -31.4$  ( $c = 0.6, \text{CHCl}_3$ ) {lit.<sup>1</sup>  $[\alpha]^{25}_{\text{D}} = +126.3$  ( $c = 0.6, \text{CHCl}_3$  for (1*R*,2*S*)-**5**)}. Enantiomeric excess was determined



by HPLC analysis: [column, Daicel Chiralcel<sup>®</sup> OD-H, 0.46 x 25 cm; hexane/2-propanol = 98:2, flow rate 0.5 mL/min, detected at 270 nm],  $t_R$  (min) = 17.8 for (1*R*, 2*S*)-**5**,  $t_R$  (min) = 20.0 for (1*S*, 2*R*)-**5**.

#### 4. $^1\text{H}$ and $^{13}\text{C}$ NMR Spectra

$^1\text{H}$  NMR (500 MHz,  $\text{CDCl}_3$ ) of **8**

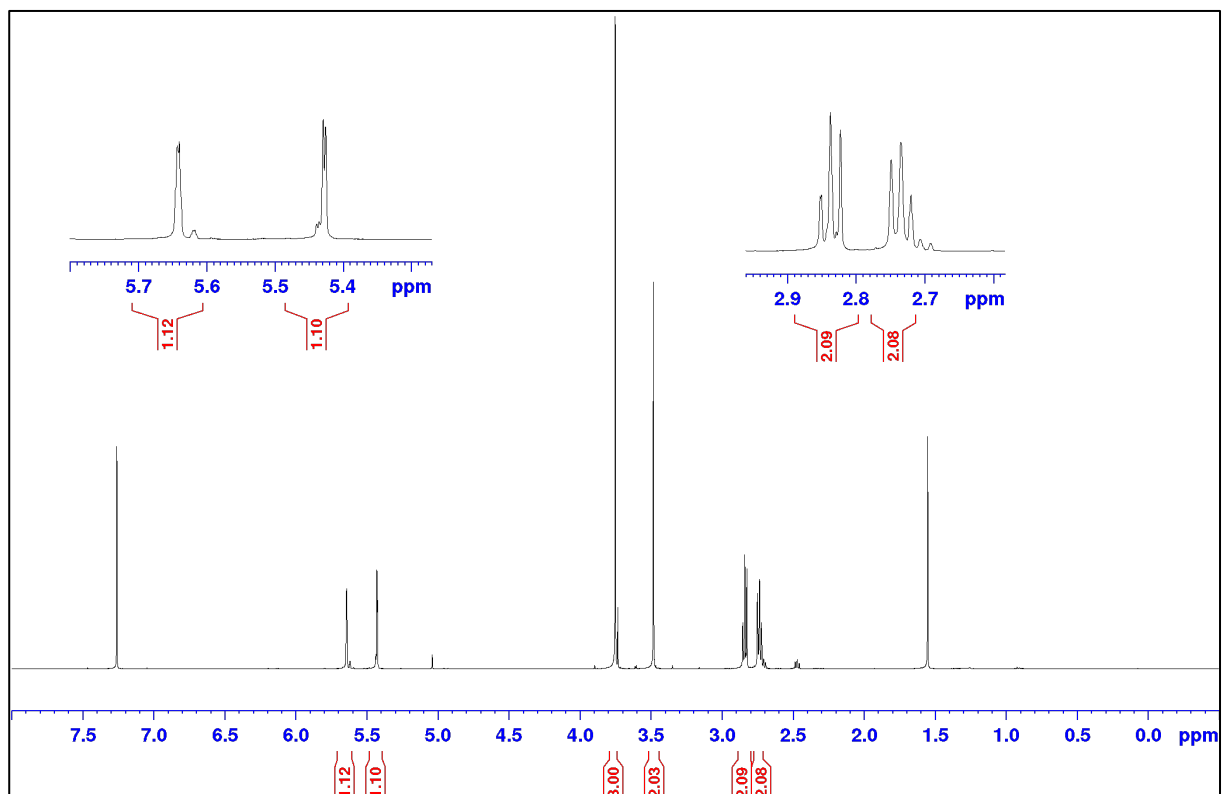

$^{13}\text{C}$  NMR (125 MHz,  $\text{CDCl}_3$ ) of **8**

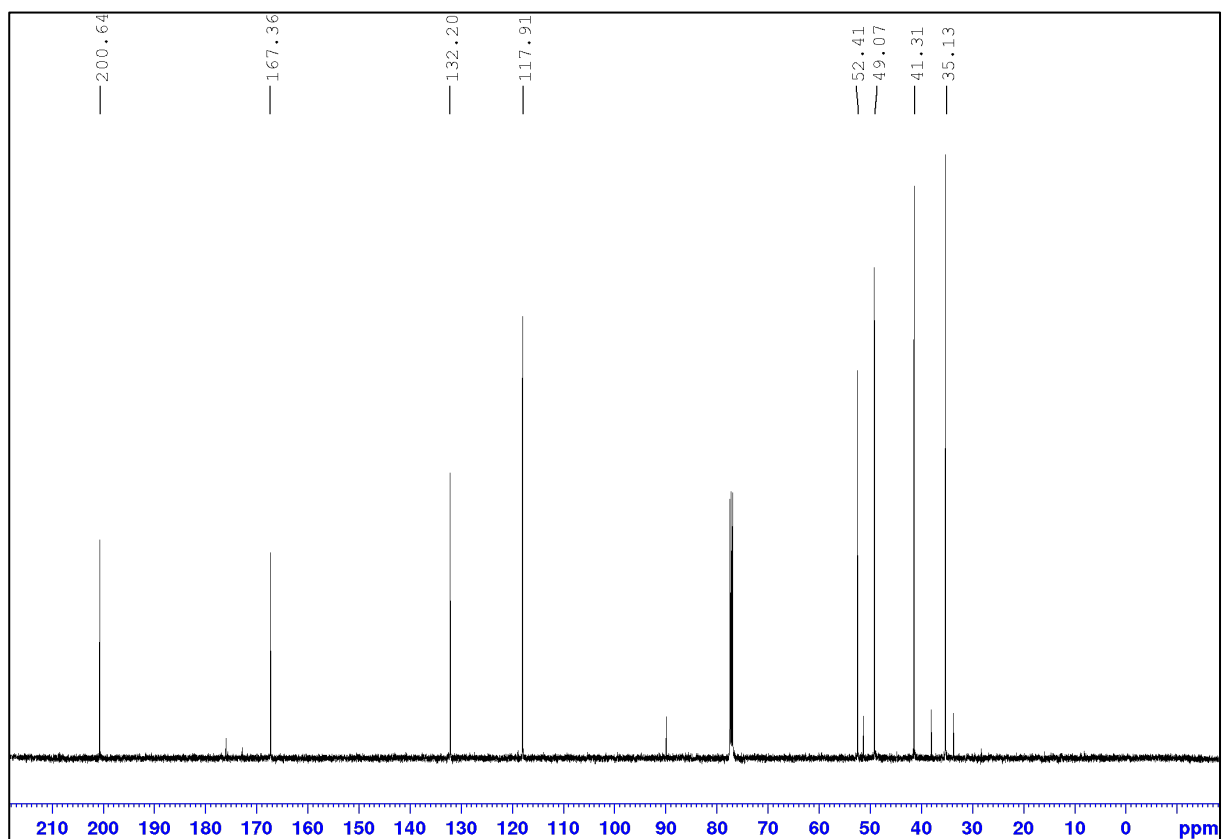

$^1\text{H}$  NMR (500 MHz,  $\text{CDCl}_3$ ) of **9a**

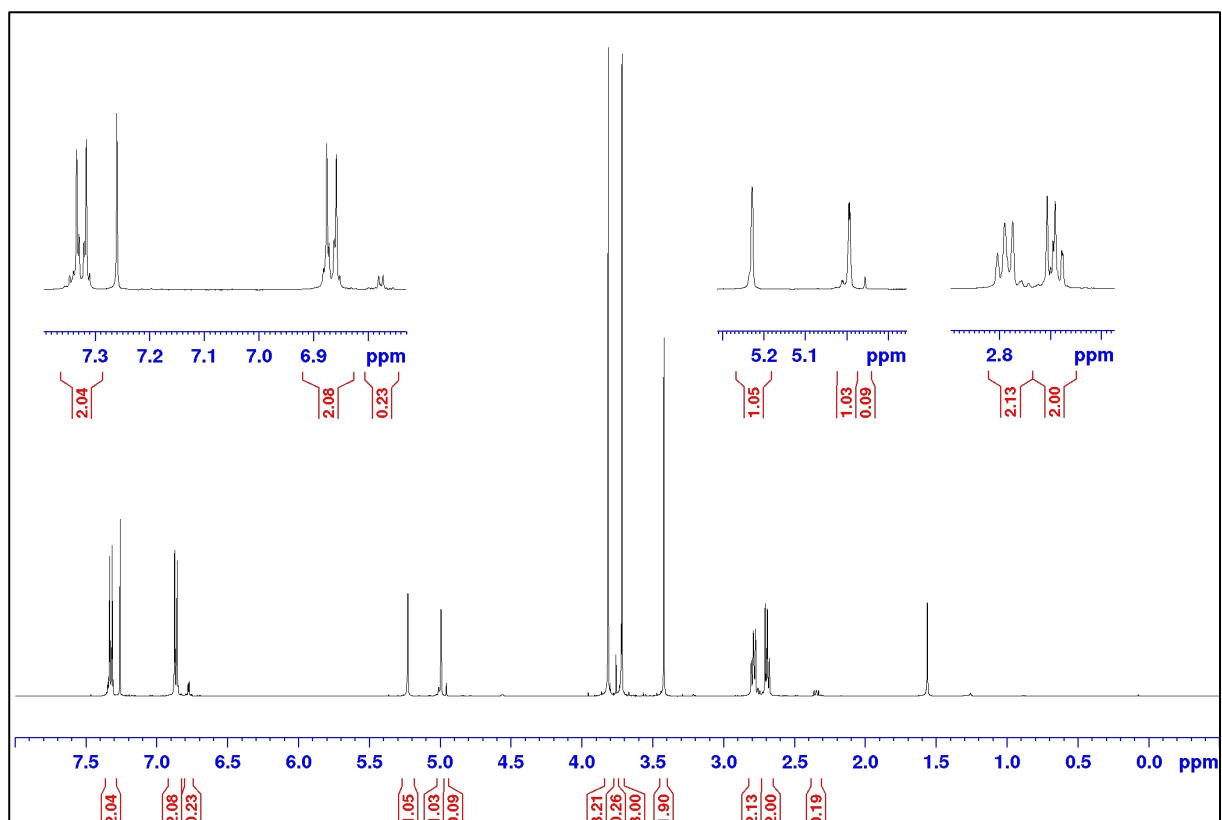

$^{13}\text{C}$  NMR (125 MHz,  $\text{CDCl}_3$ ) of **9a**

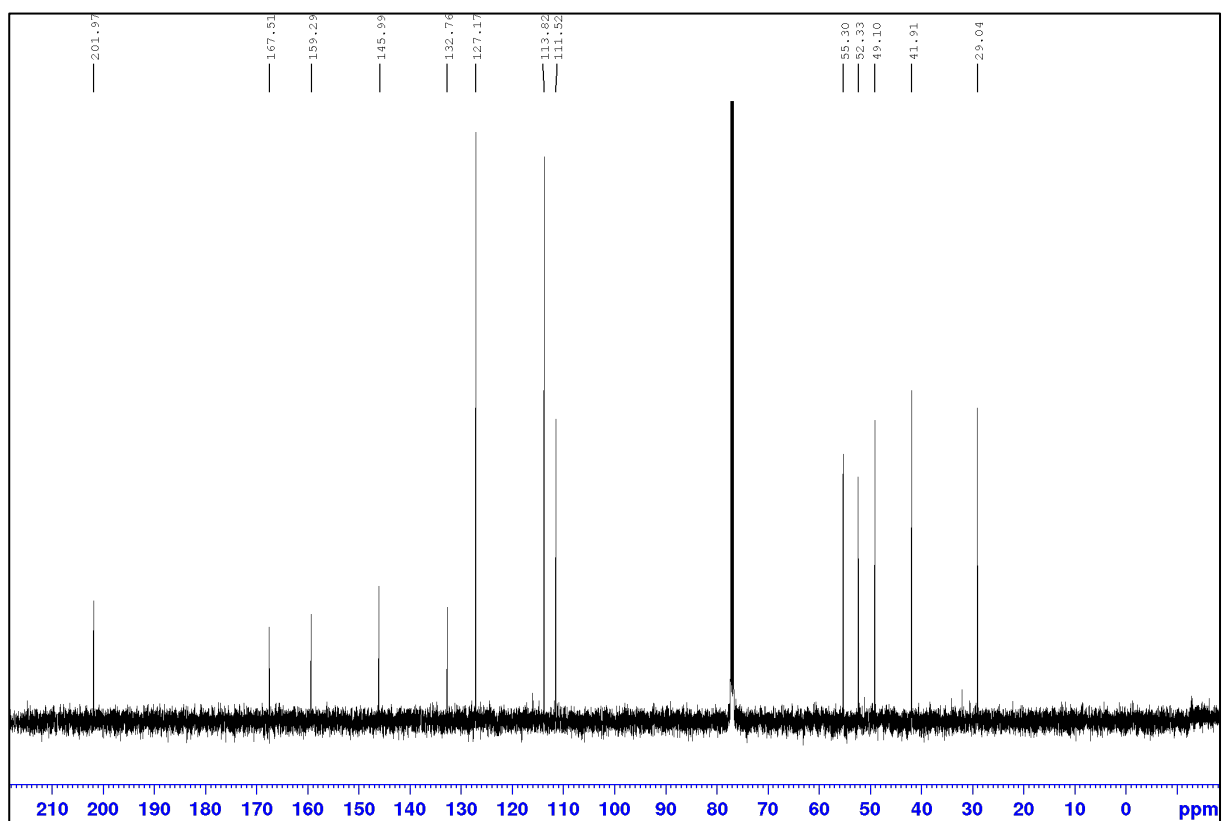

$^1\text{H}$  NMR (500 MHz,  $\text{CDCl}_3$ ) of **9b**

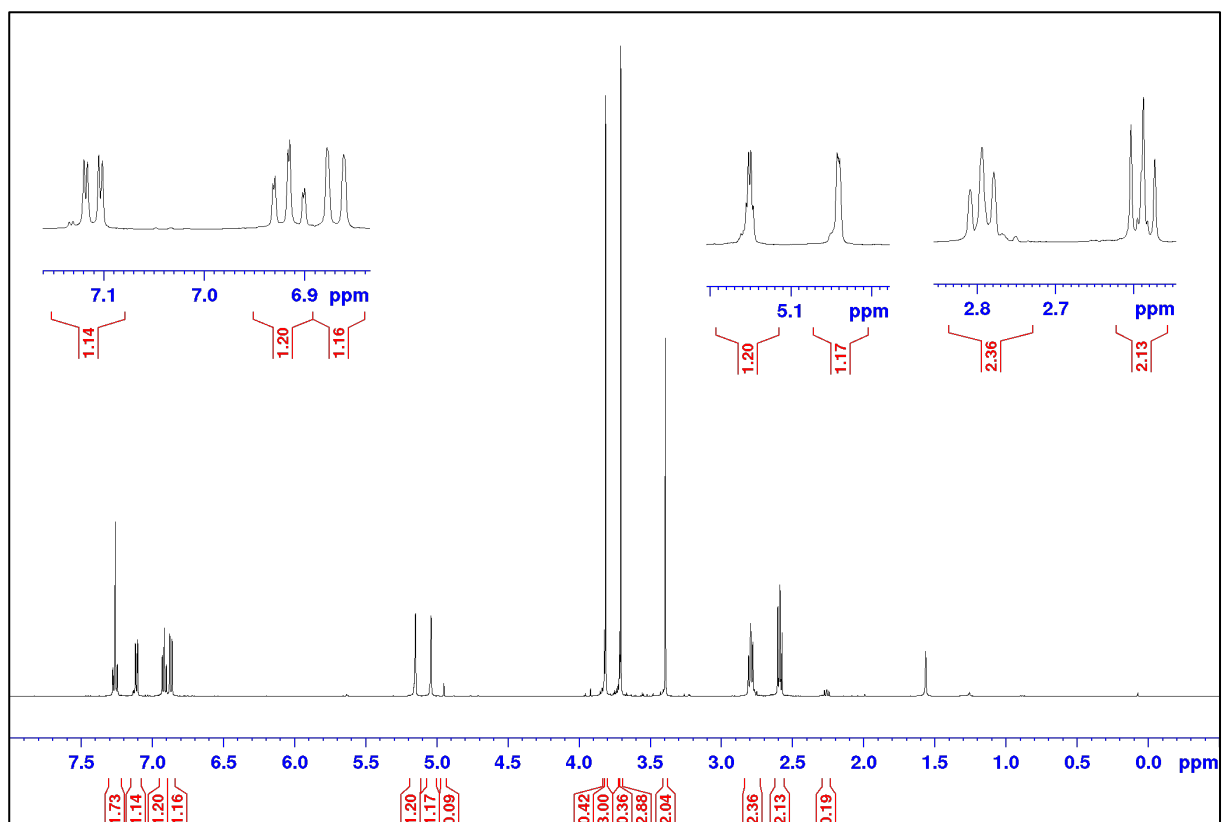

$^{13}\text{C}$  NMR (125 MHz,  $\text{CDCl}_3$ ) of **9b**

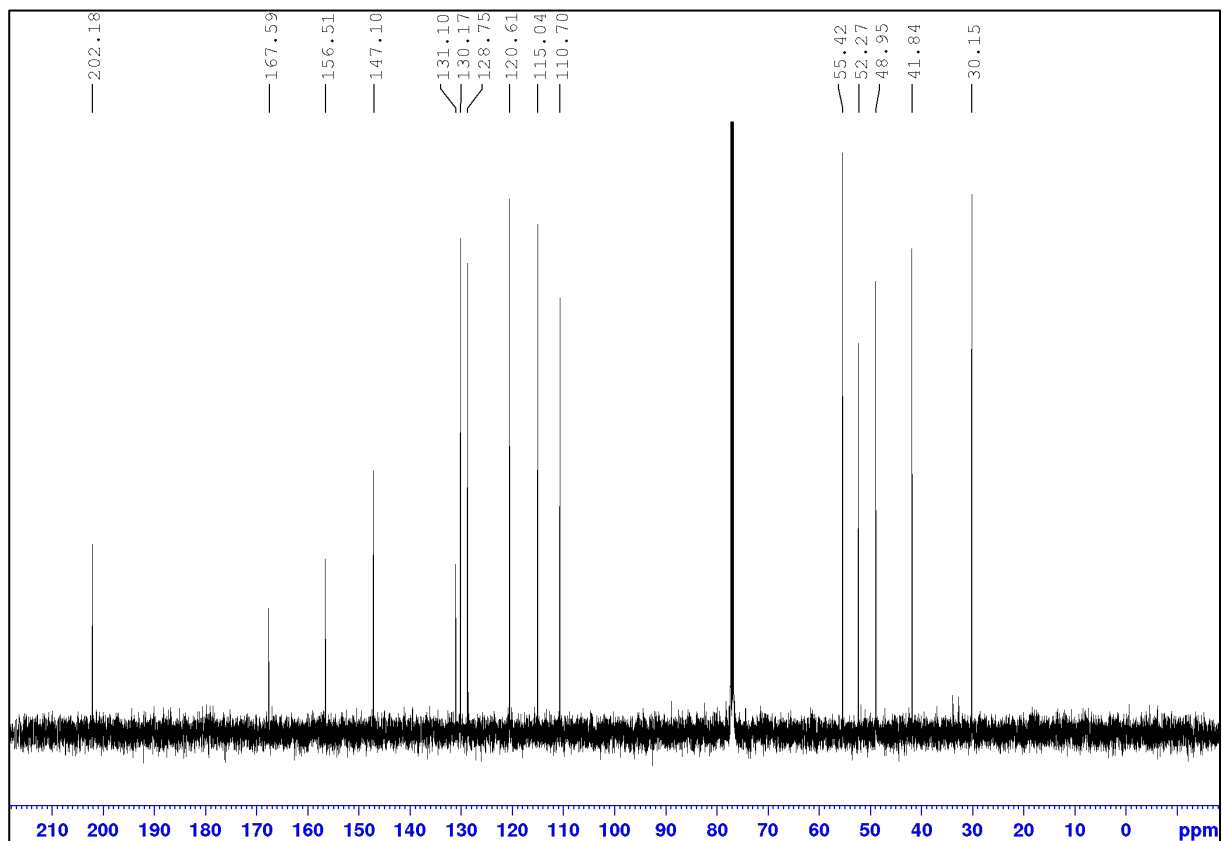

$^1\text{H}$  NMR (500 MHz,  $\text{CDCl}_3$ ) of **9c**

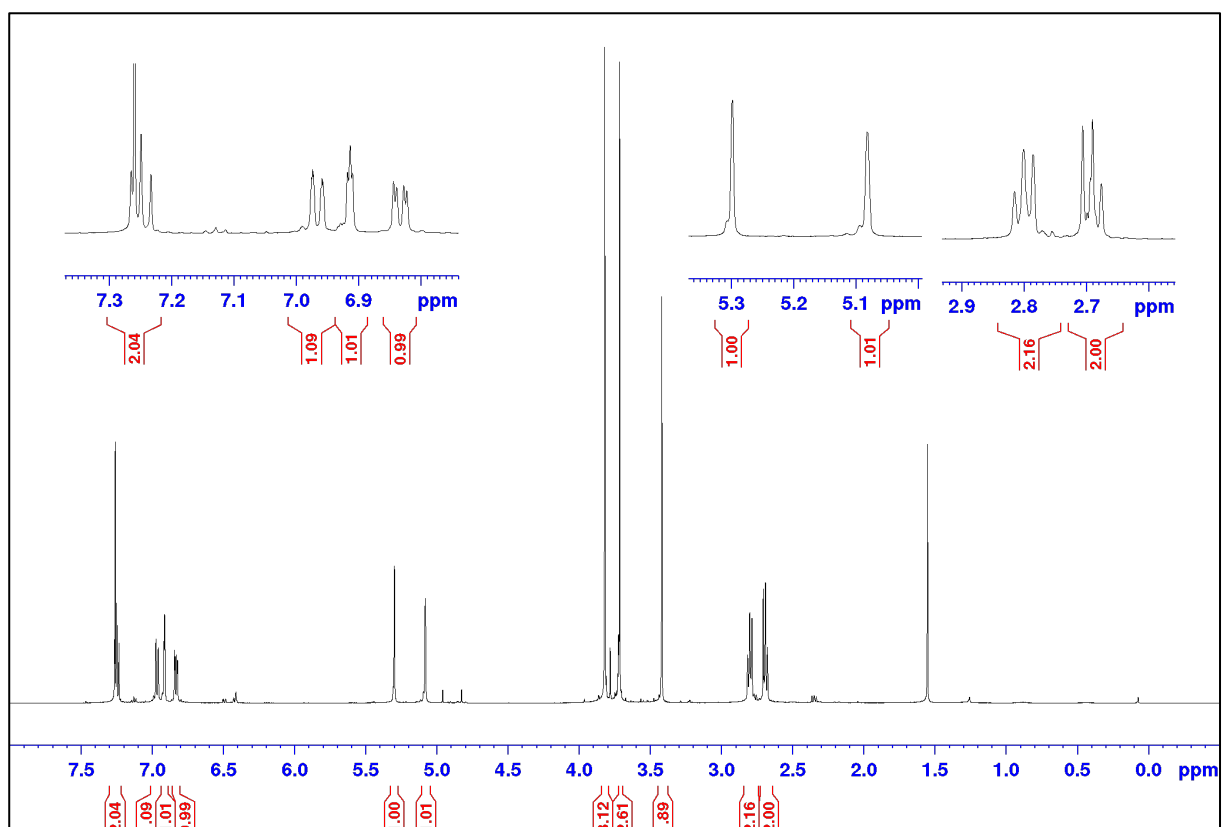

$^{13}\text{C}$  NMR (125 MHz,  $\text{CDCl}_3$ ) of **9c**

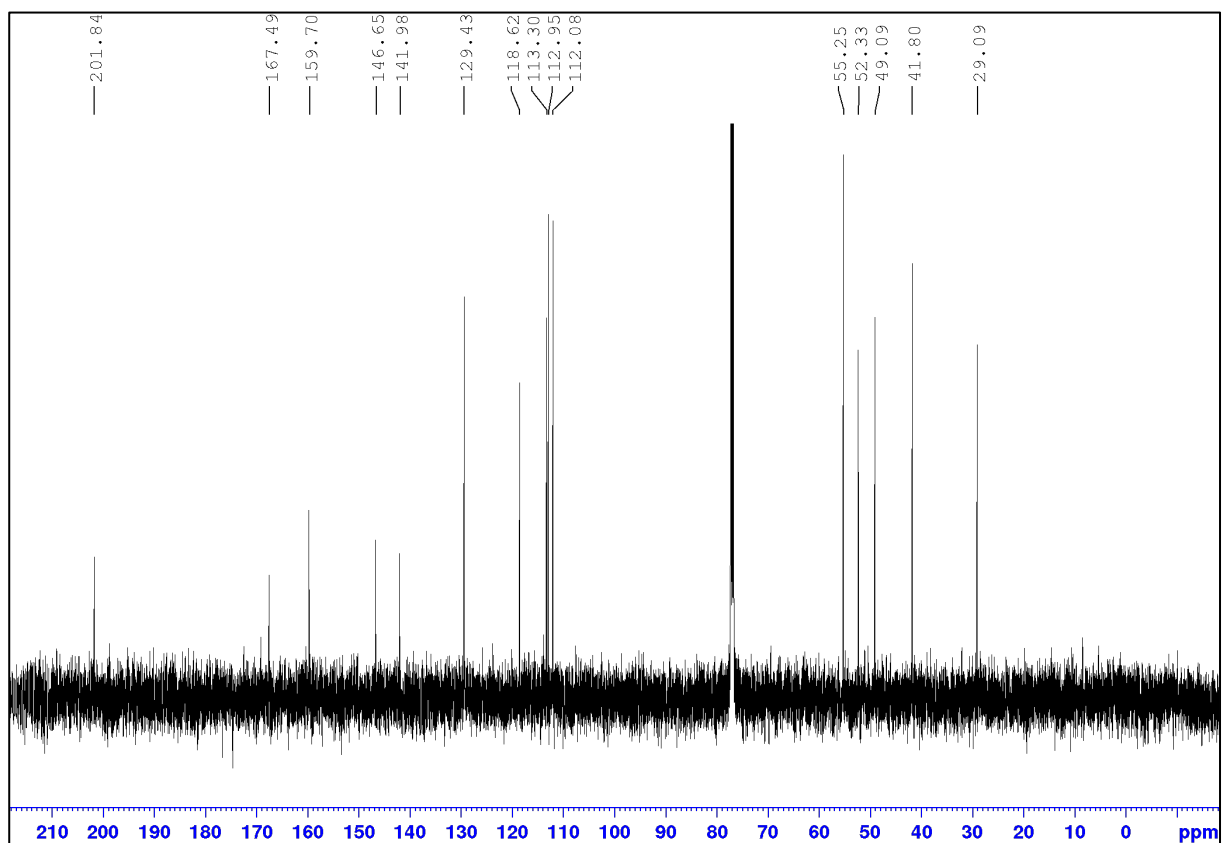

$^1\text{H}$  NMR (500 MHz,  $\text{CDCl}_3$ ) of **9d**

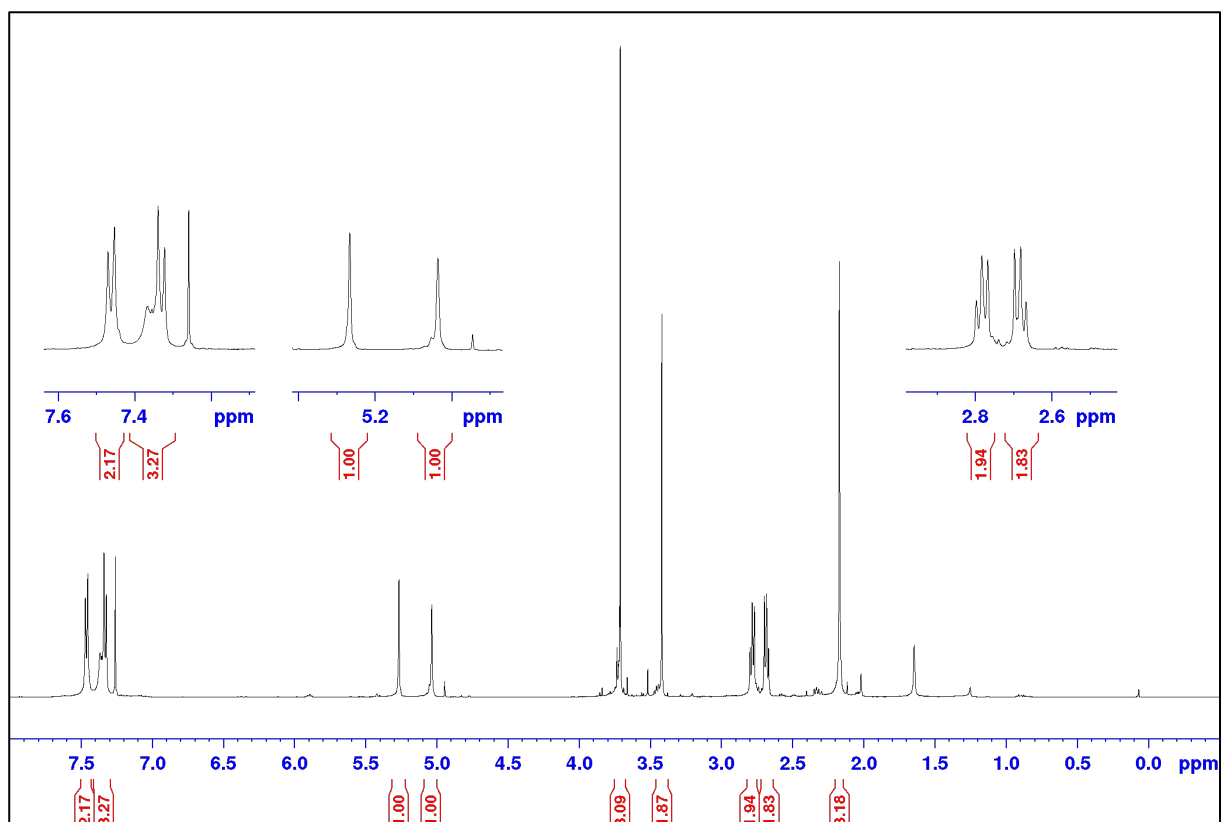

$^{13}\text{C}$  NMR (125 MHz,  $\text{CDCl}_3$ ) of **9d**

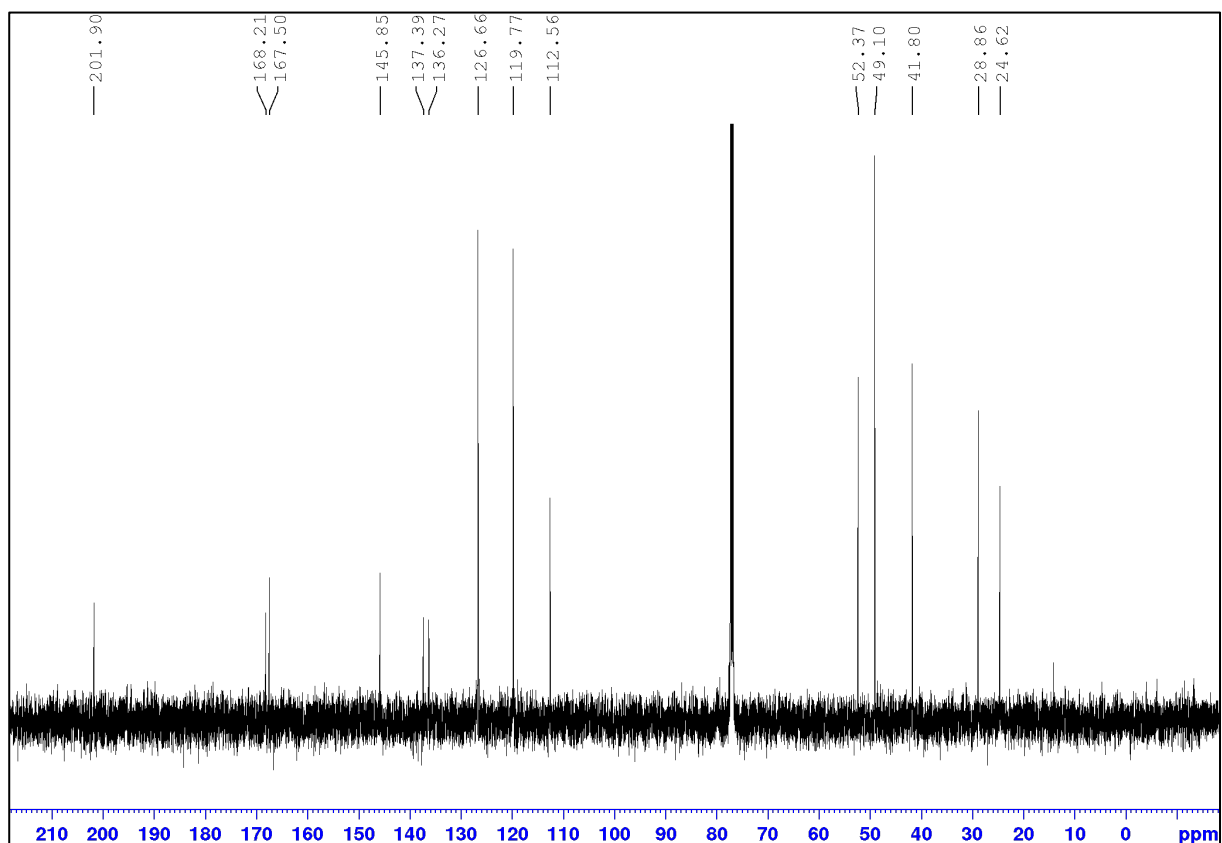

$^1\text{H}$  NMR (500 MHz,  $\text{CDCl}_3$ ) of **9e**

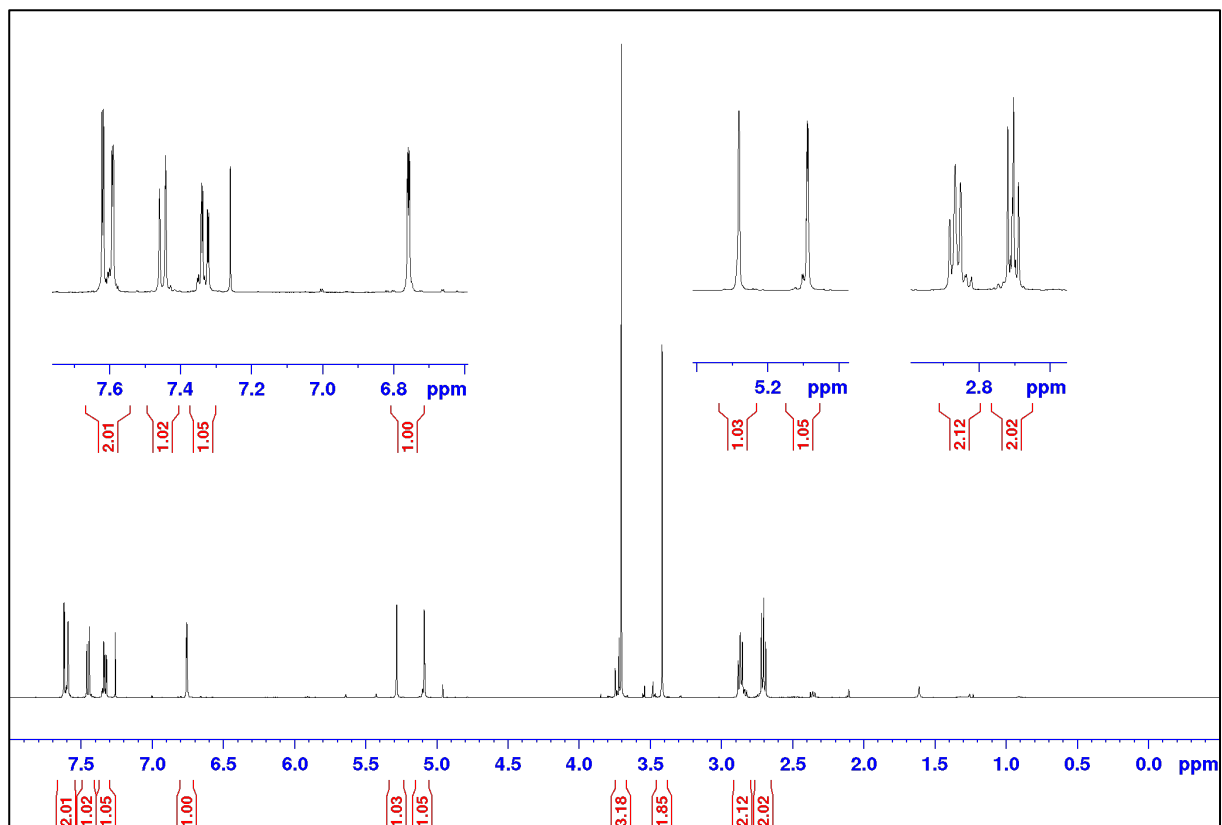

$^{13}\text{C}$  NMR (125 MHz,  $\text{CDCl}_3$ ) of **9e**

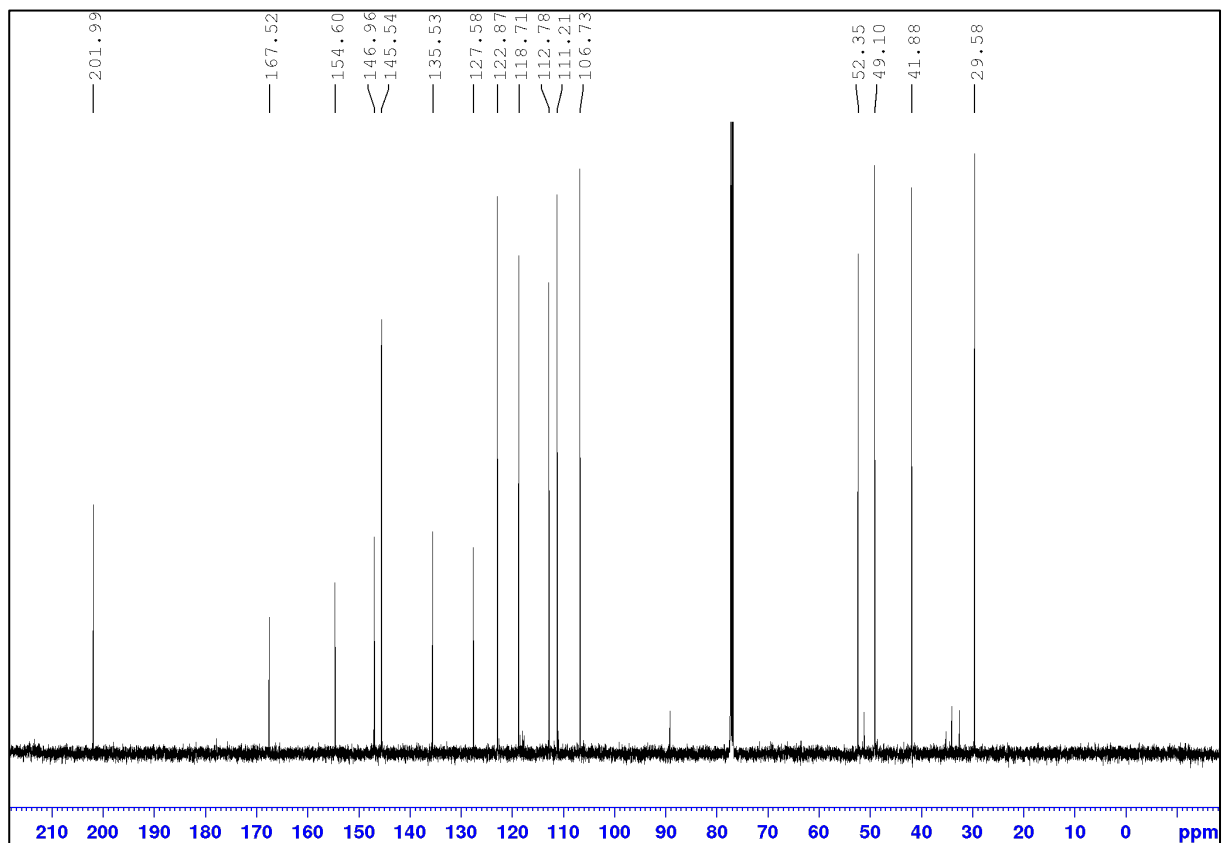

$^1\text{H}$  NMR (500 MHz,  $\text{CDCl}_3$ ) of **9f**

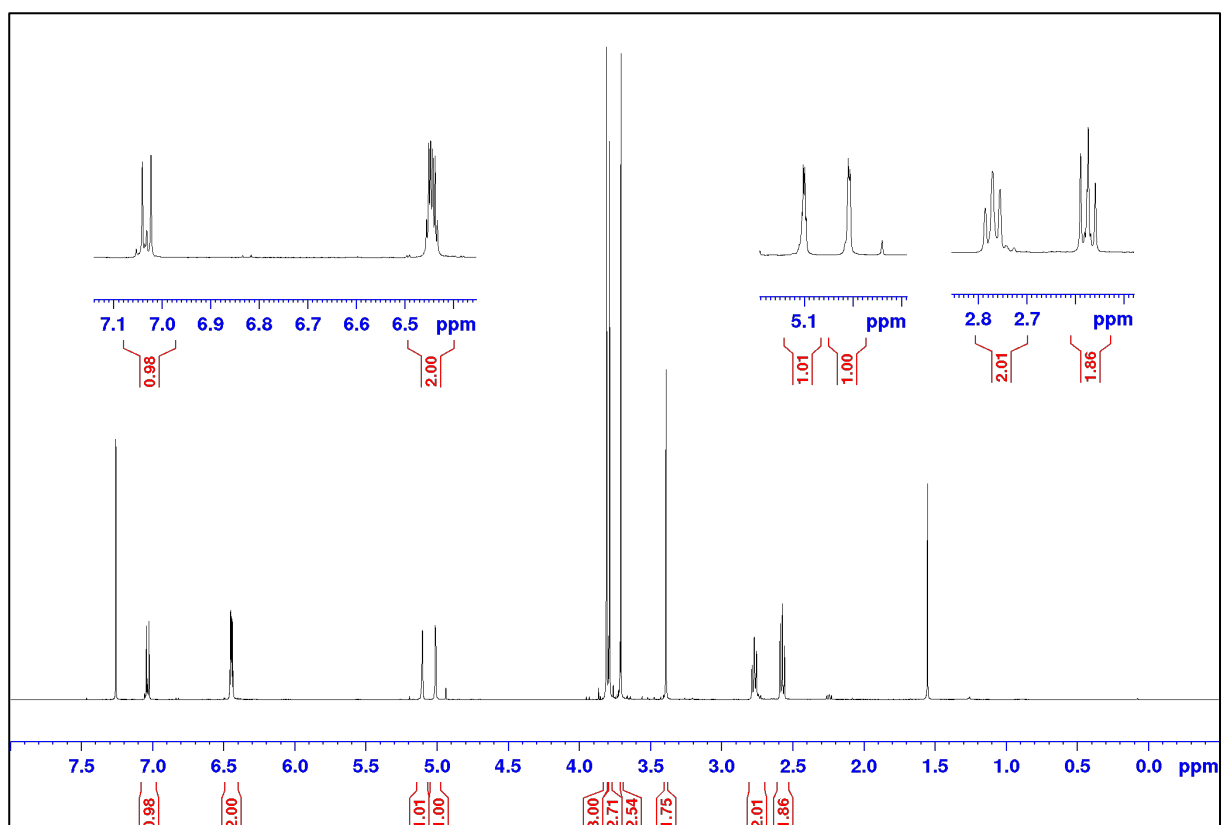

$^{13}\text{C}$  NMR (125 MHz,  $\text{CDCl}_3$ ) of **9f**

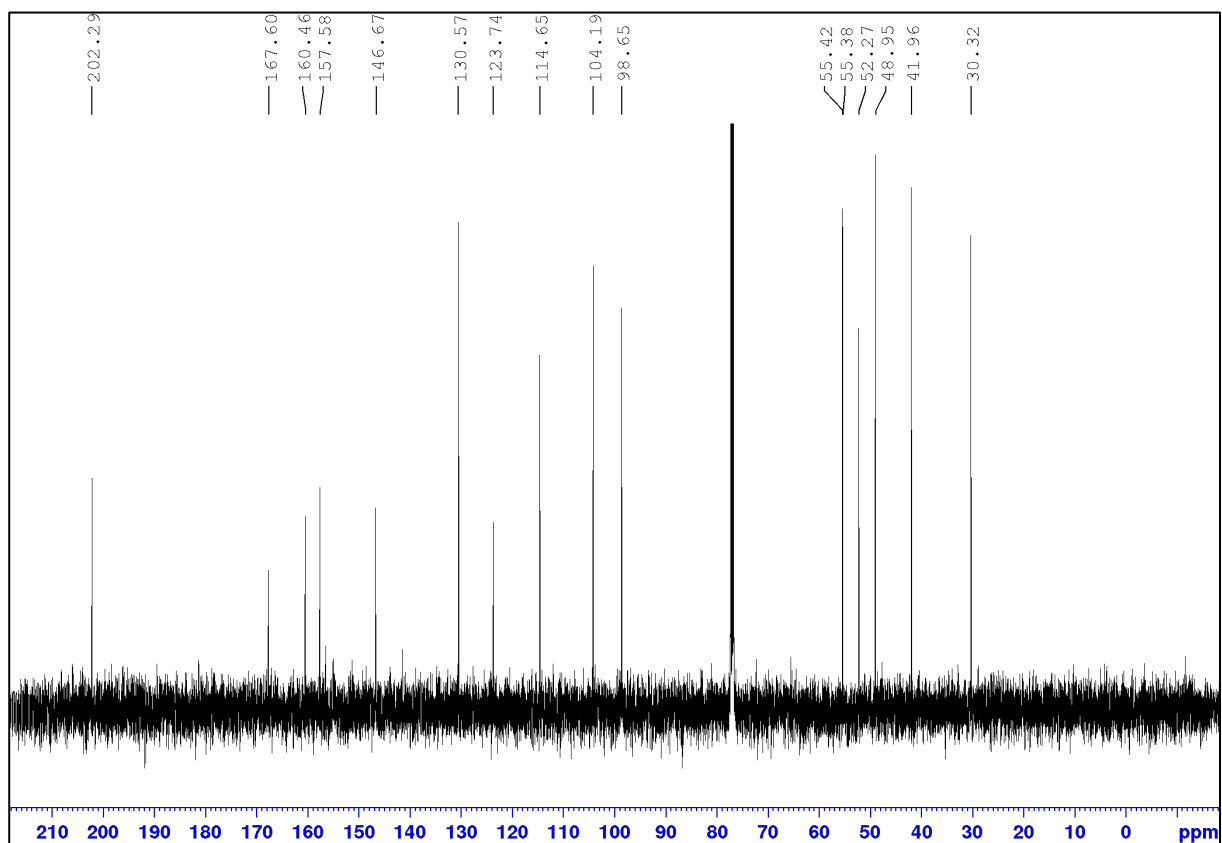



$^1\text{H}$  NMR (500 MHz,  $\text{CDCl}_3$ ) of **9g**

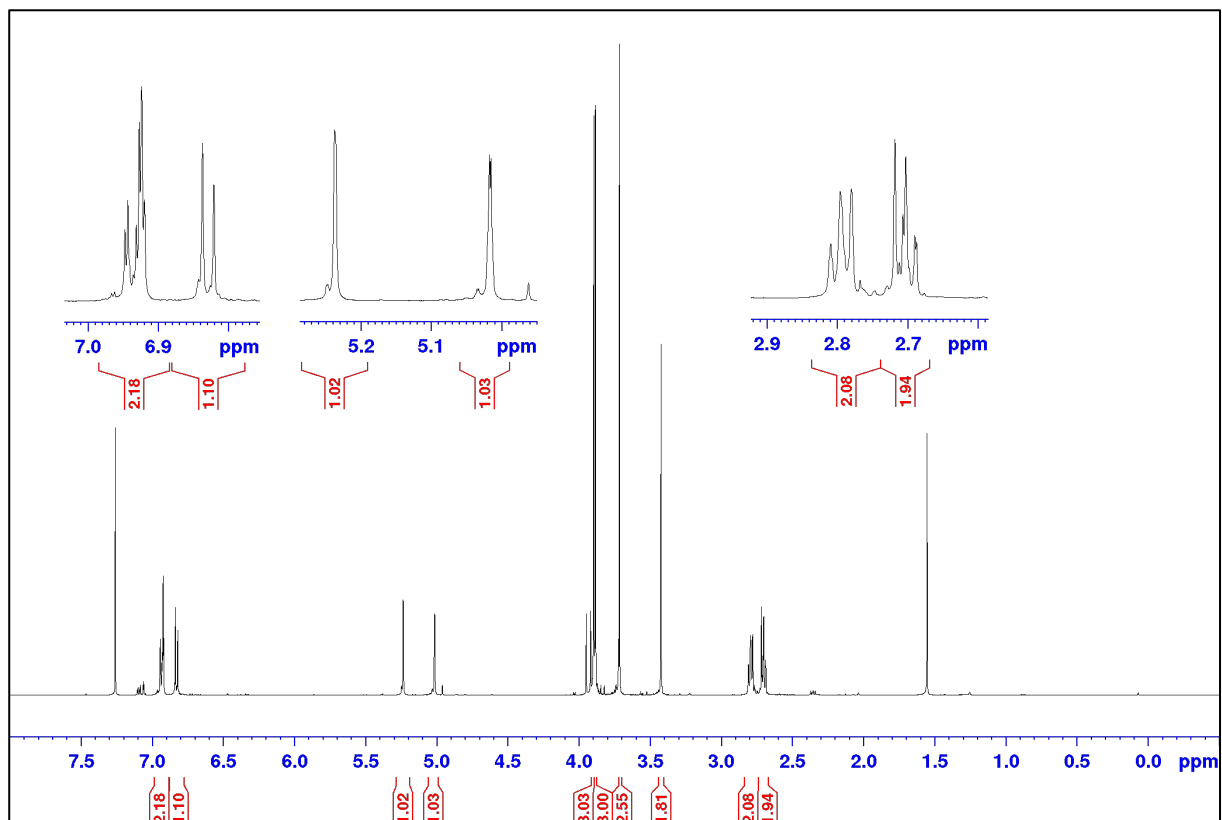

$^{13}\text{C}$  NMR (125 MHz,  $\text{CDCl}_3$ ) of **9g**

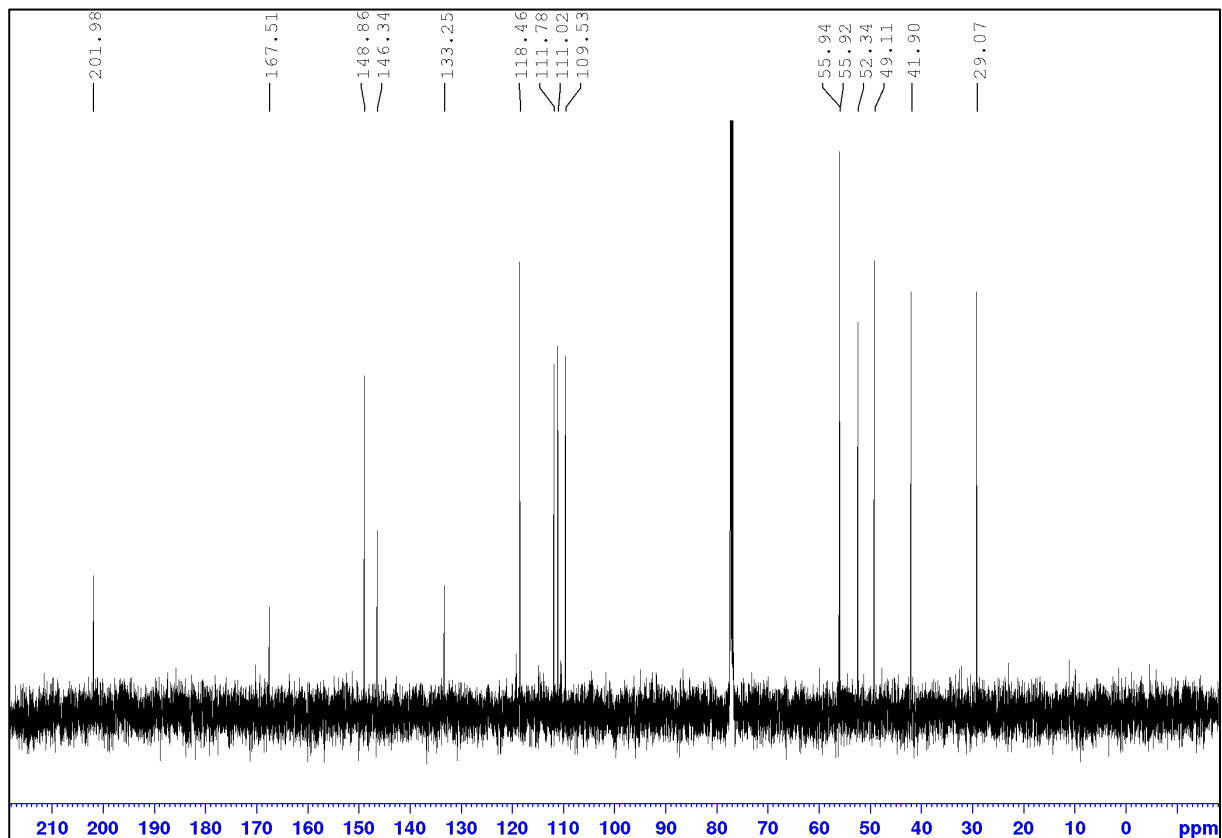

$^1\text{H}$  NMR (500 MHz,  $\text{CDCl}_3$ ) of **9h**

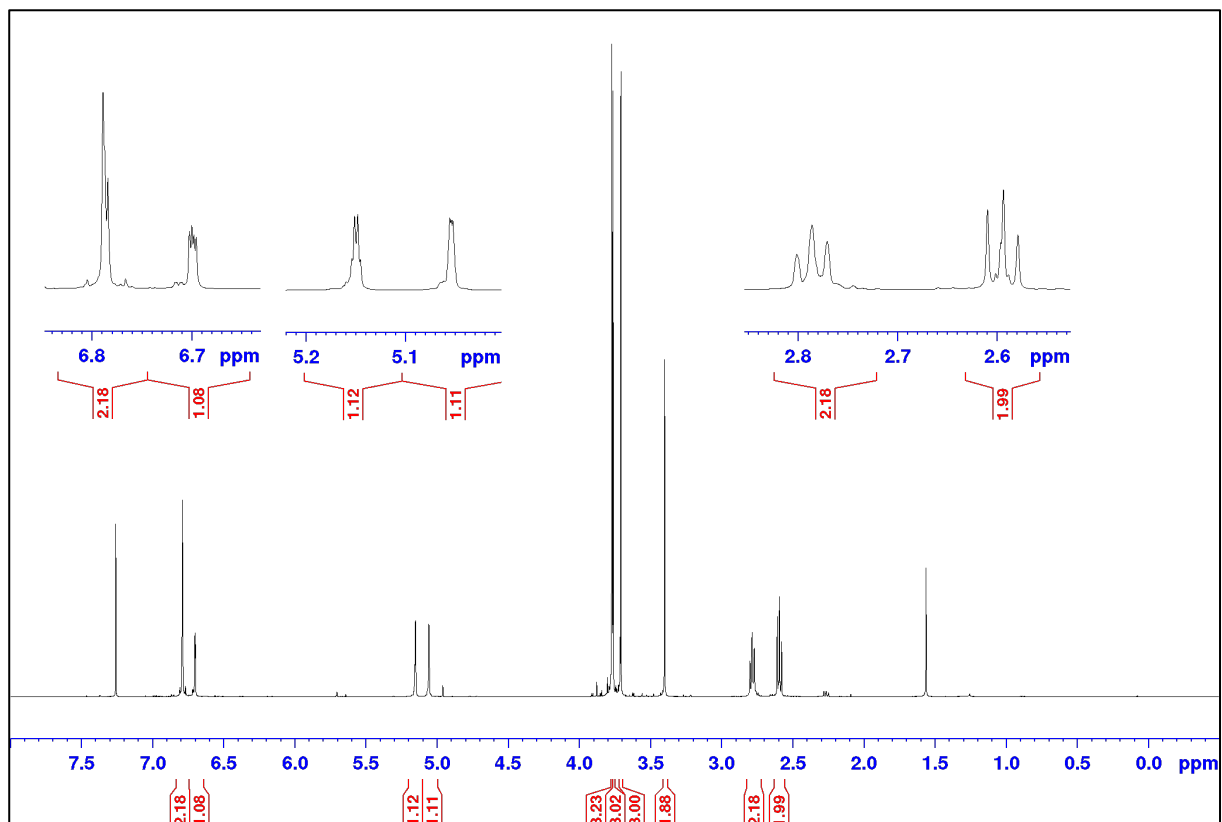

$^{13}\text{C}$  NMR (125 MHz,  $\text{CDCl}_3$ ) of **9h**

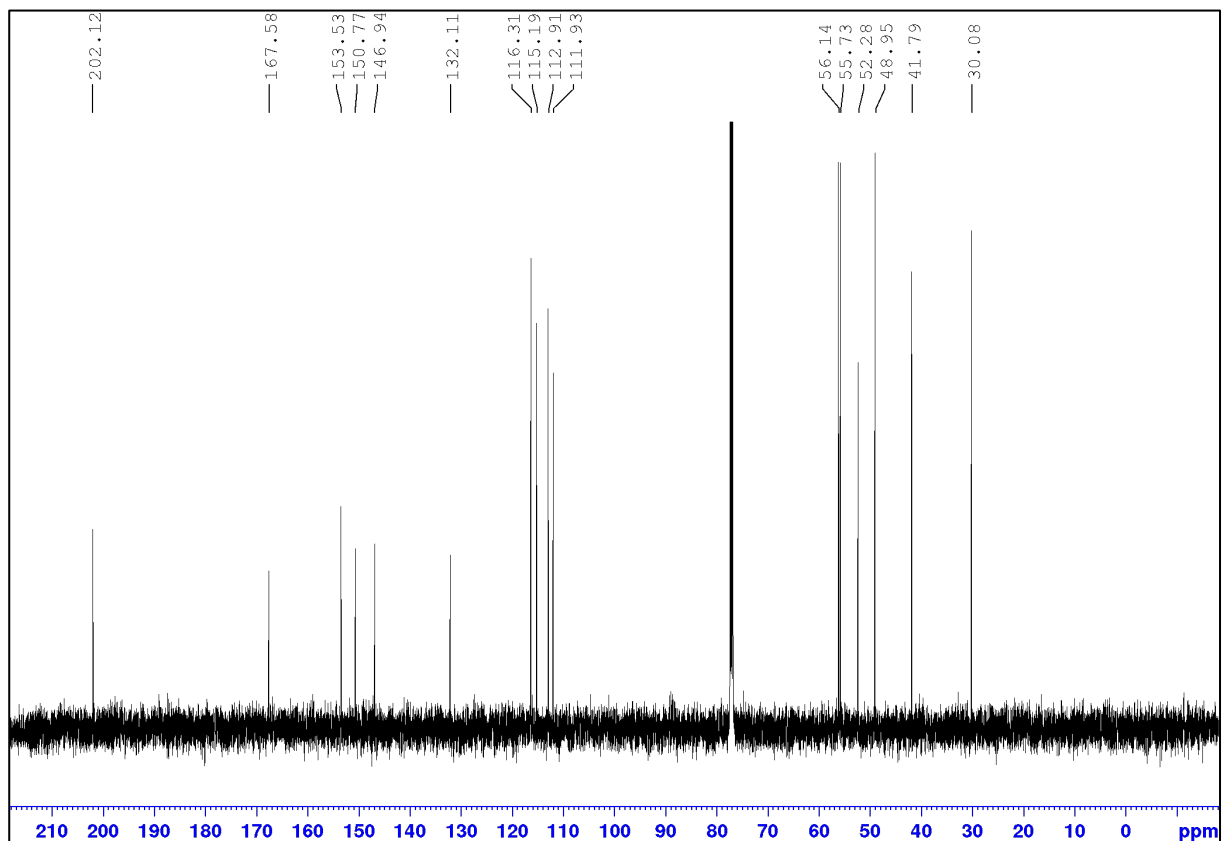

$^1\text{H}$  NMR (500 MHz,  $\text{CDCl}_3$ ) of **9i**

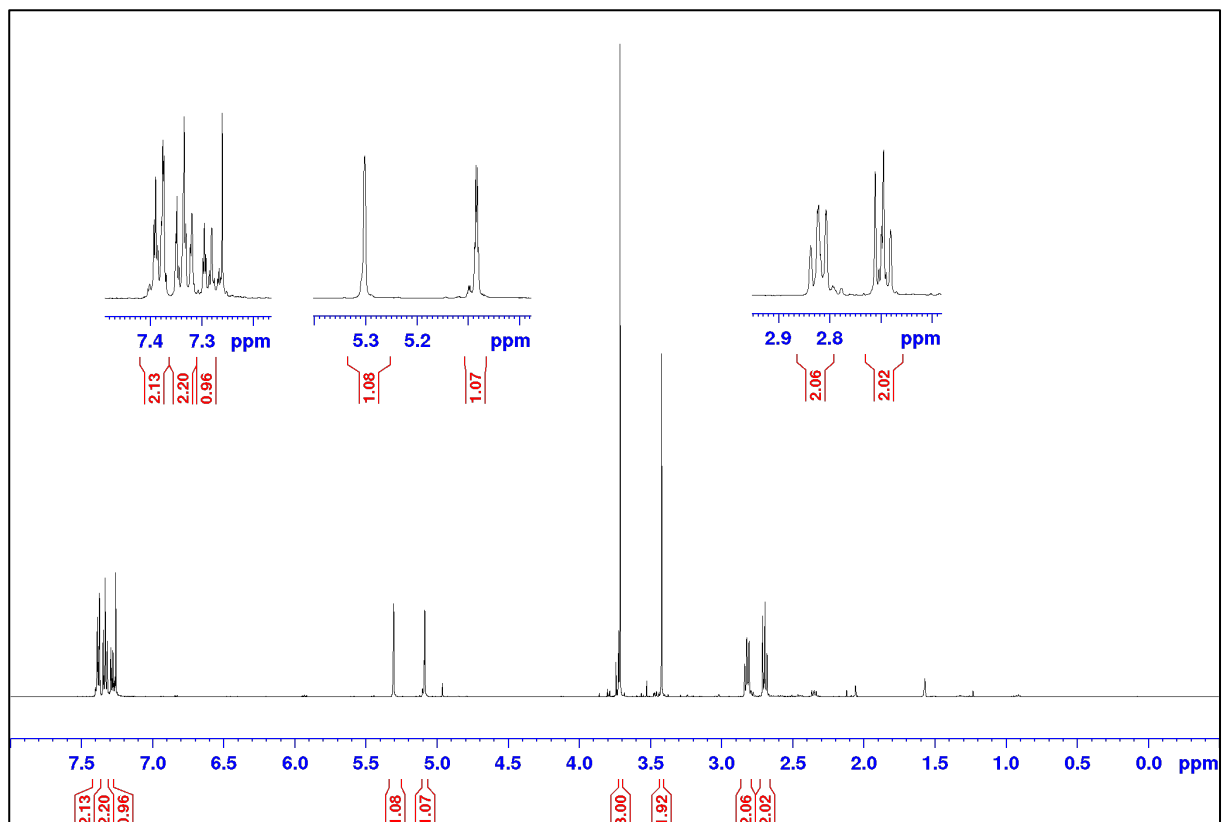

$^{13}\text{C}$  NMR (125 MHz,  $\text{CDCl}_3$ ) of **9i**

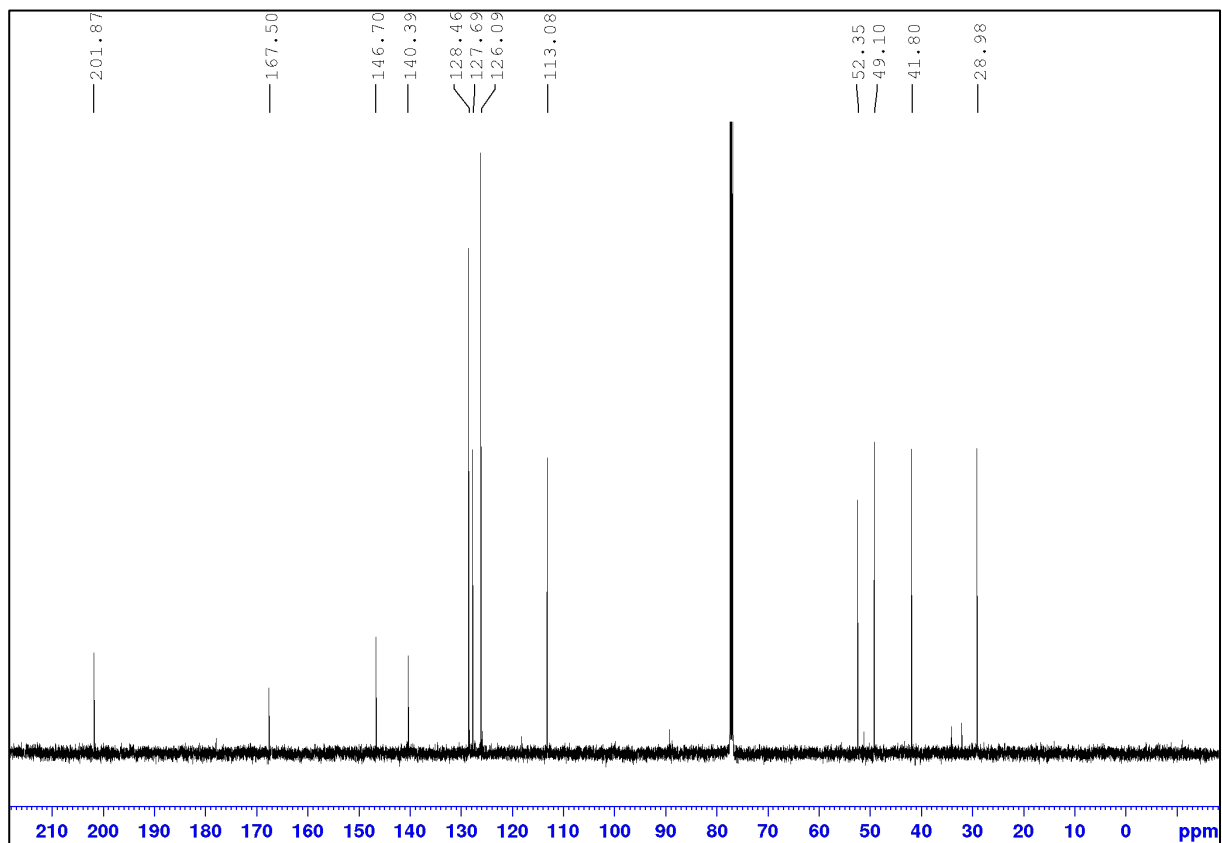

$^1\text{H}$  NMR (500 MHz,  $\text{CDCl}_3$ ) of **9j**

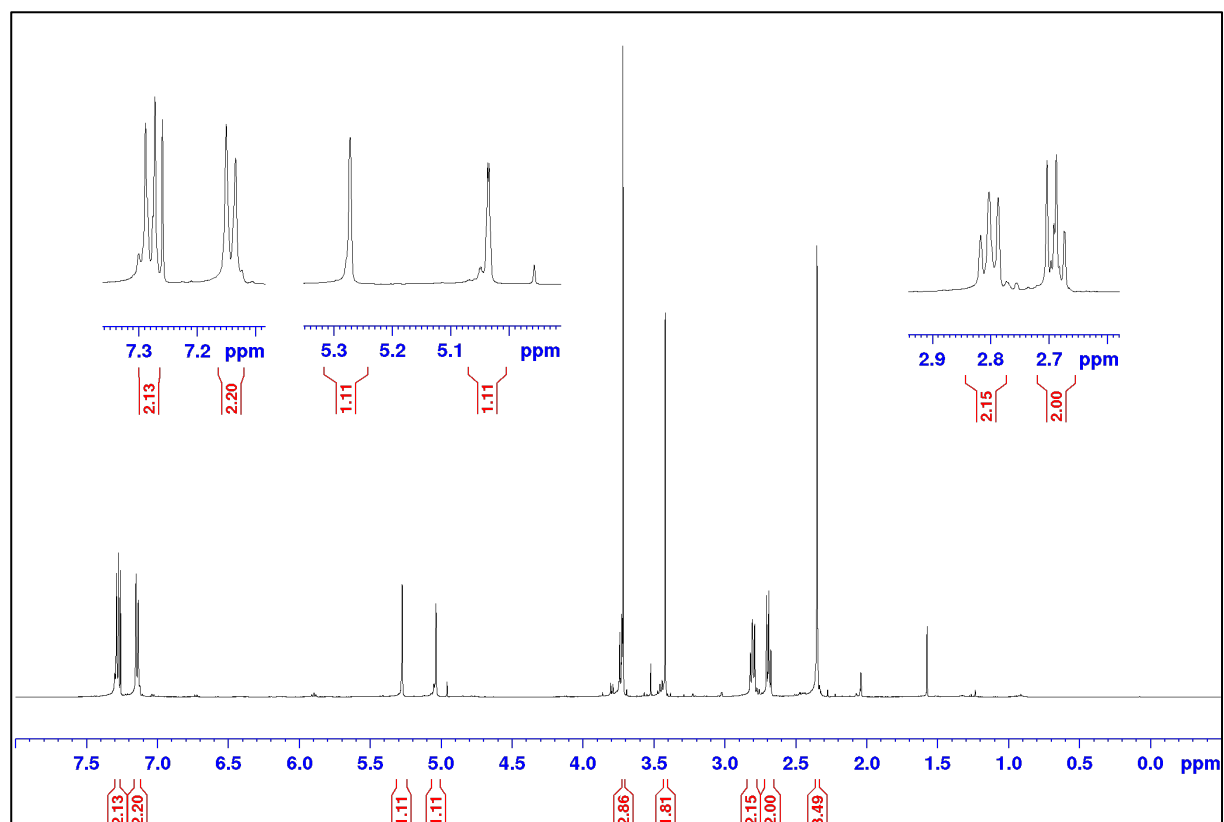

$^{13}\text{C}$  NMR (125 MHz,  $\text{CDCl}_3$ ) of **9j**

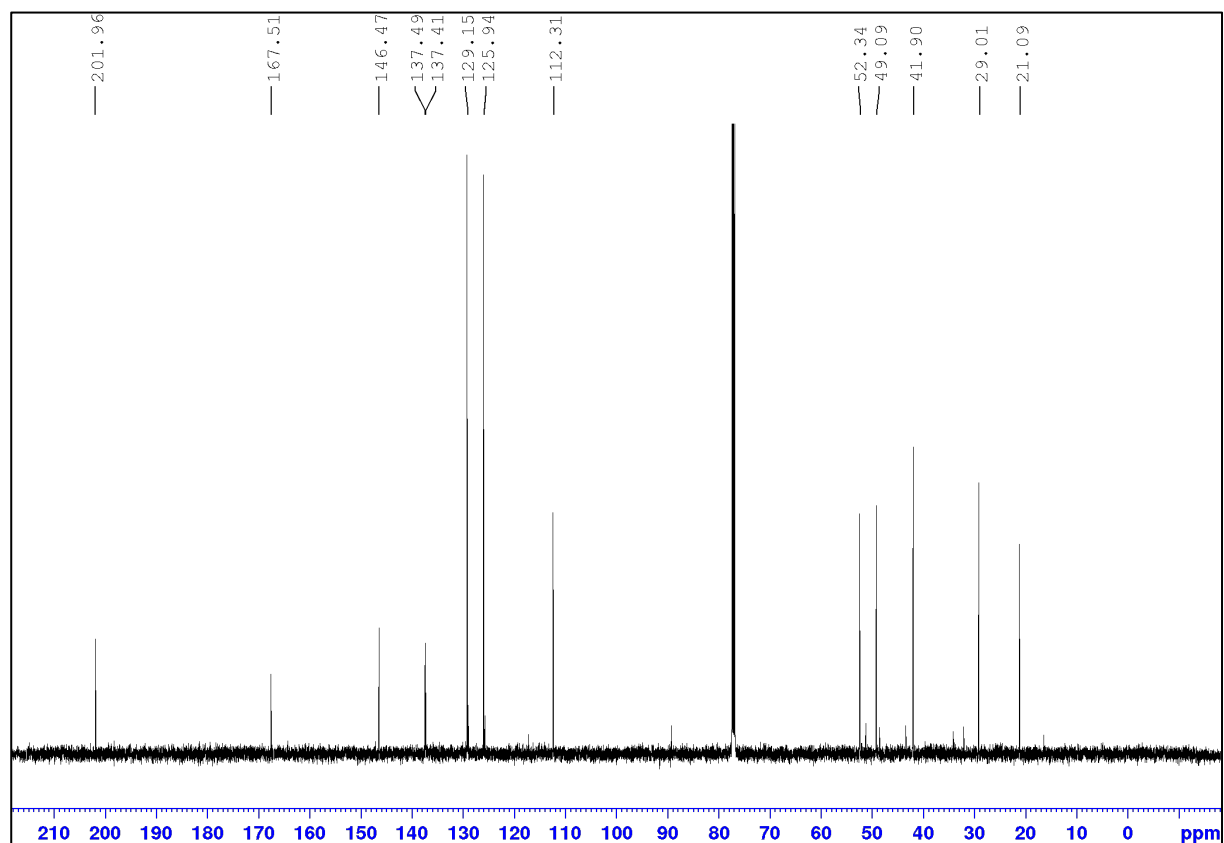

$^1\text{H}$  NMR (500 MHz,  $\text{CDCl}_3$ ) of **9k**

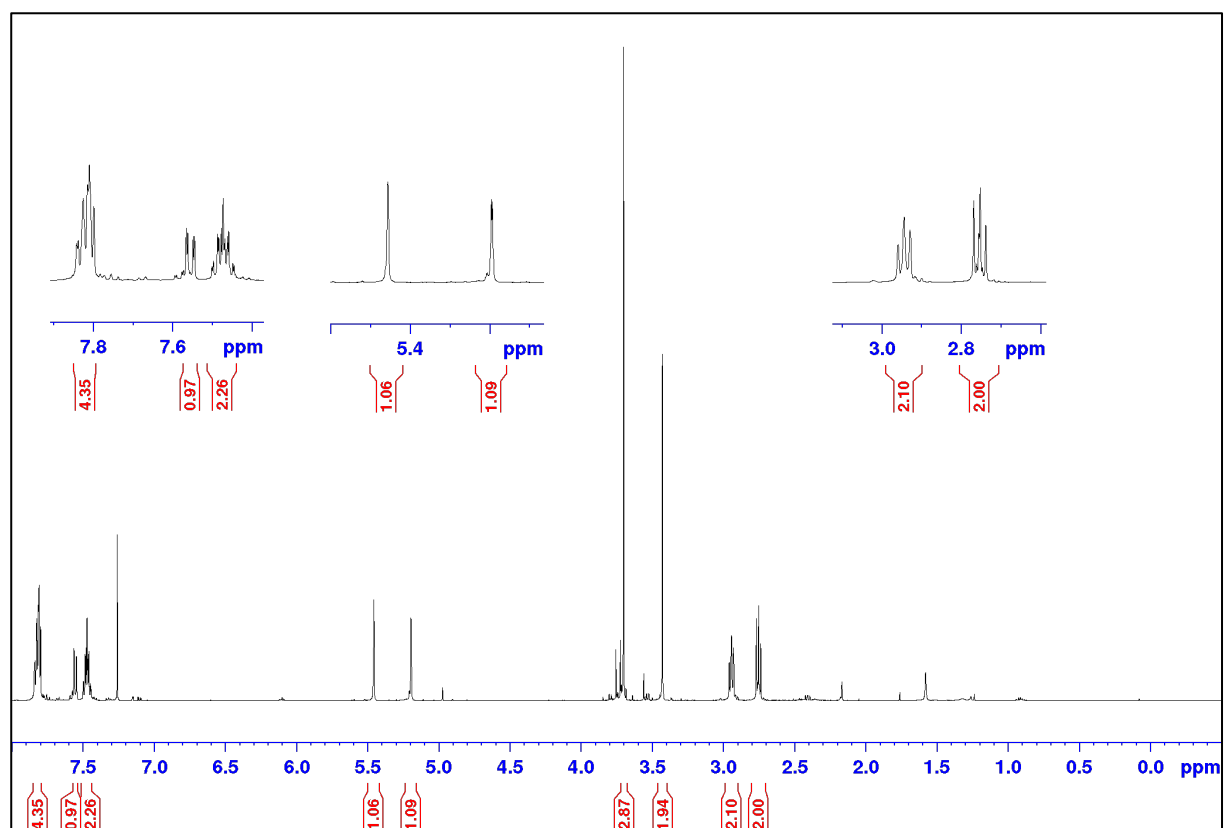

$^{13}\text{C}$  NMR (125 MHz,  $\text{CDCl}_3$ ) of **9k**

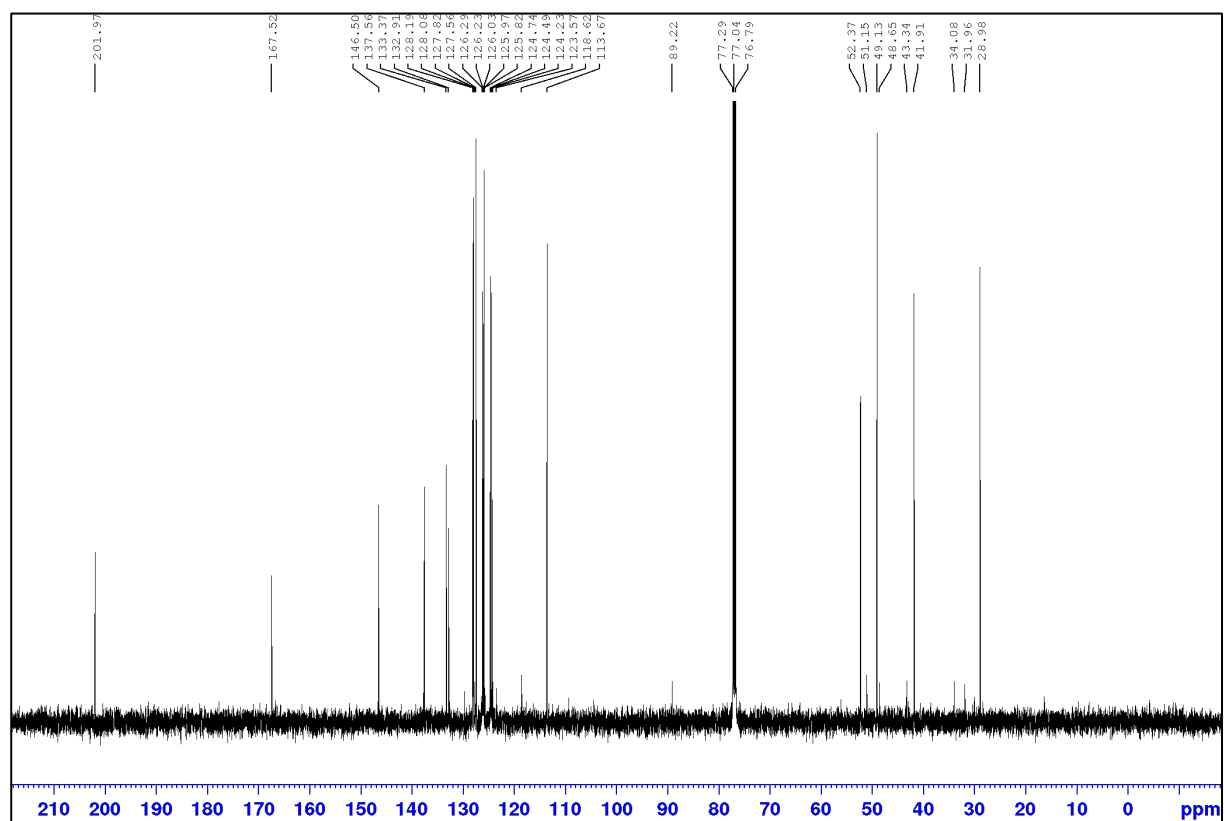

$^1\text{H}$  NMR (500 MHz,  $\text{CDCl}_3$ ) of **91**

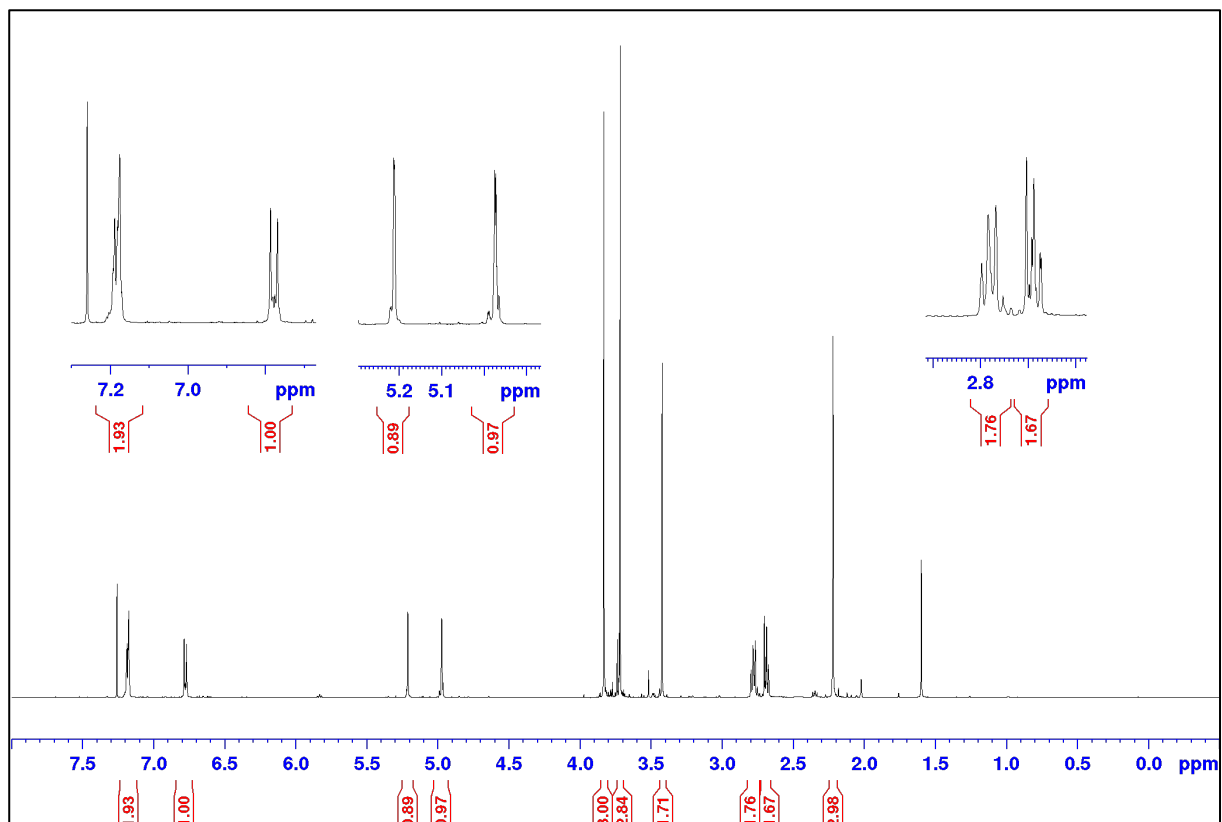

$^{13}\text{C}$  NMR (125 MHz,  $\text{CDCl}_3$ ) of **91**

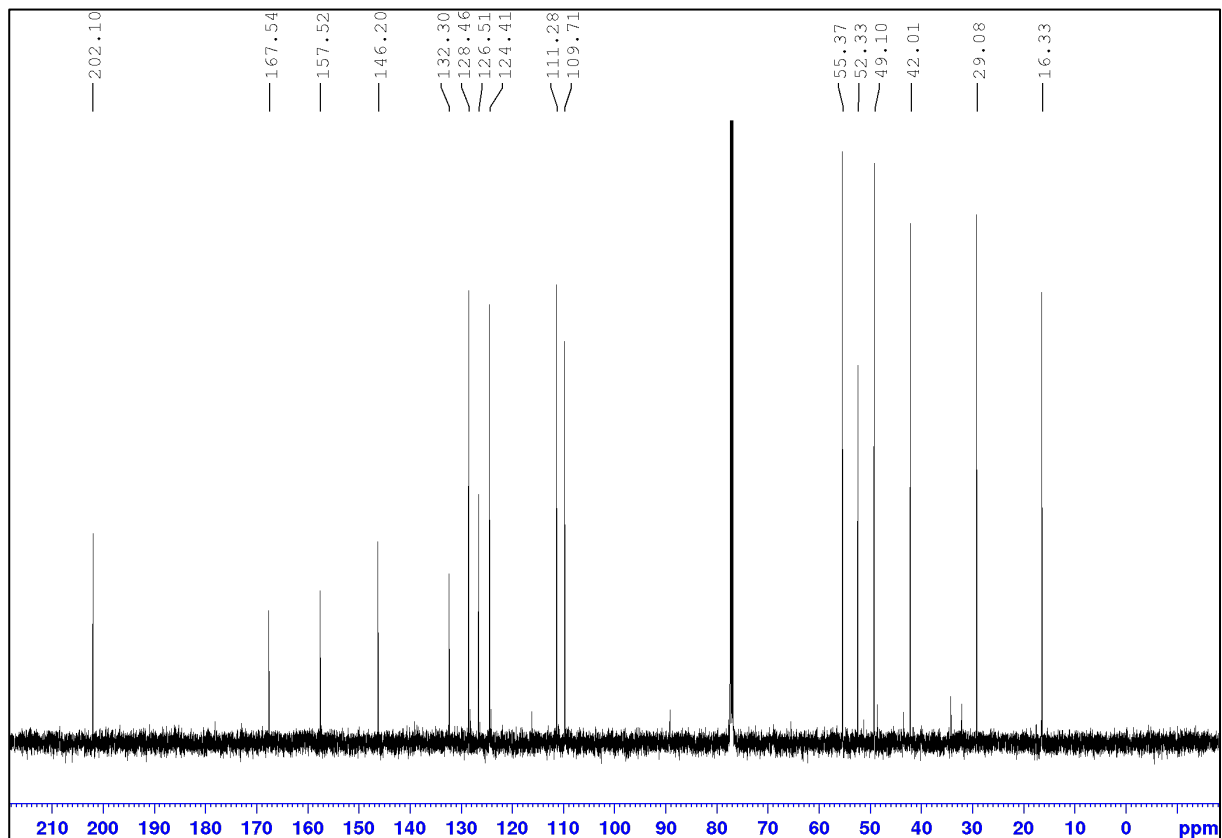

$^1\text{H}$  NMR (500 MHz,  $\text{CDCl}_3$ ) of **9m**

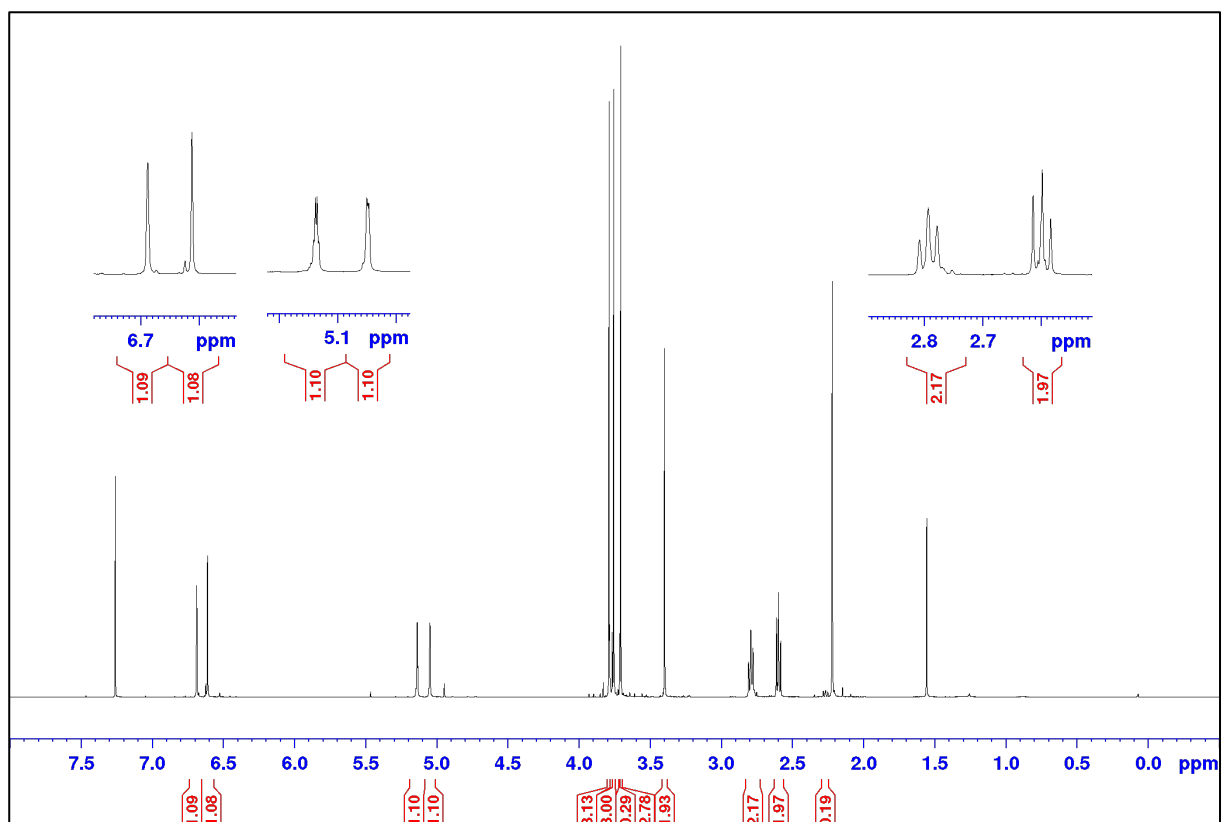

$^{13}\text{C}$  NMR (125 MHz,  $\text{CDCl}_3$ ) of **9m**

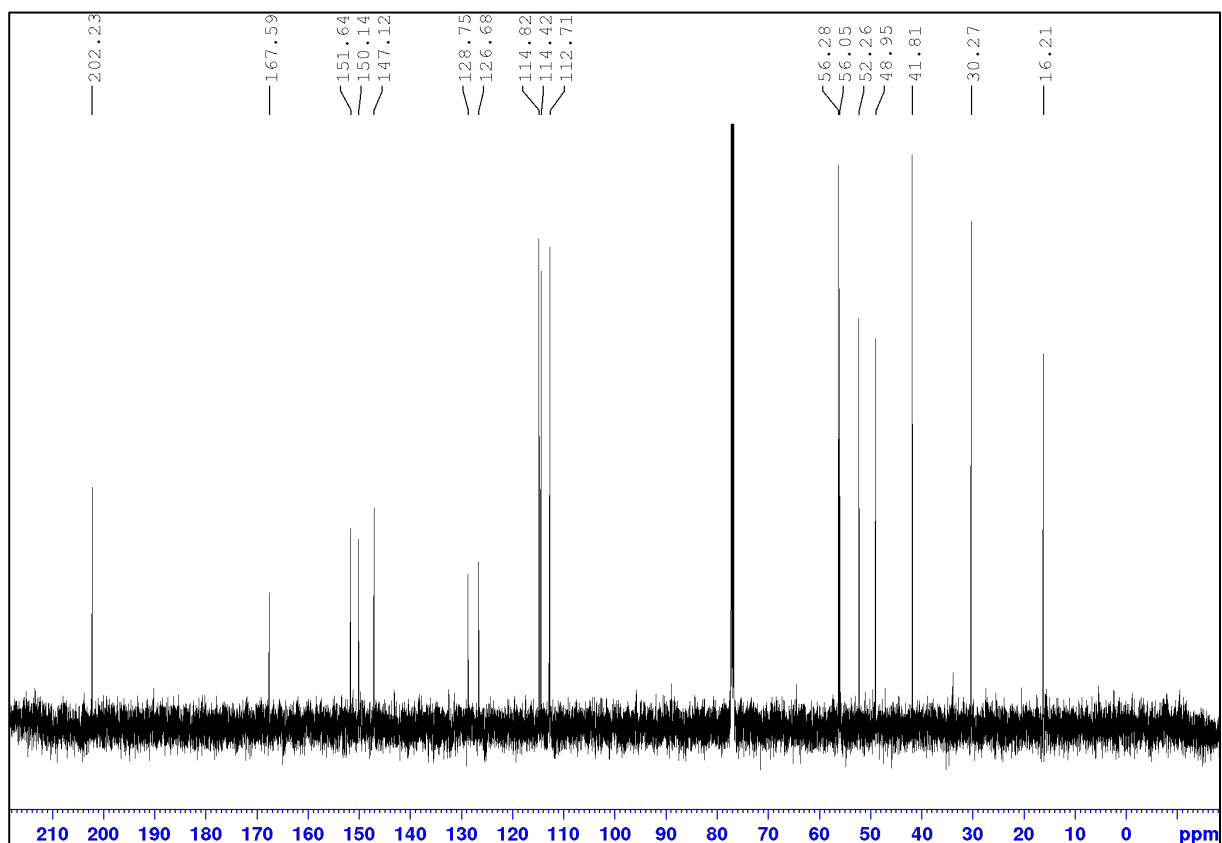

$^1\text{H}$  NMR (500 MHz,  $\text{CDCl}_3$ ) of **9n**

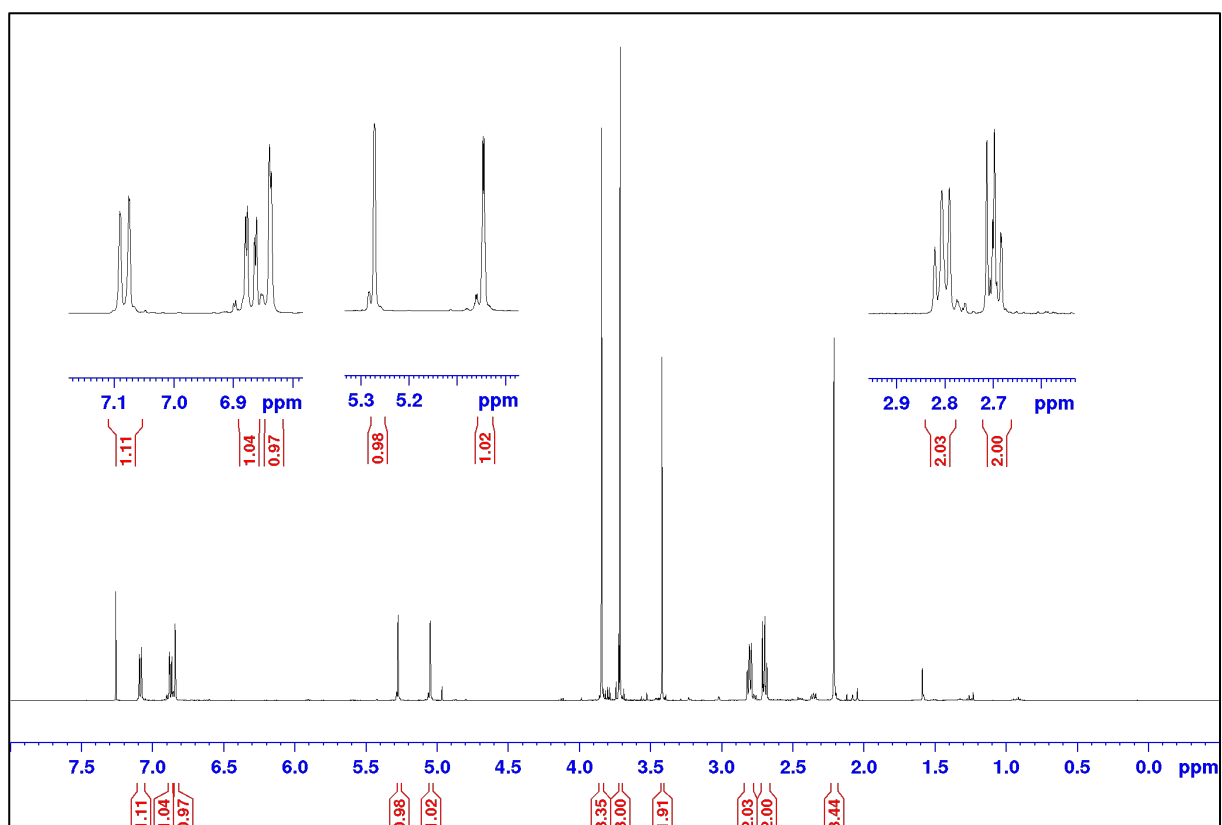

$^{13}\text{C}$  NMR (125 MHz,  $\text{CDCl}_3$ ) of **9n**

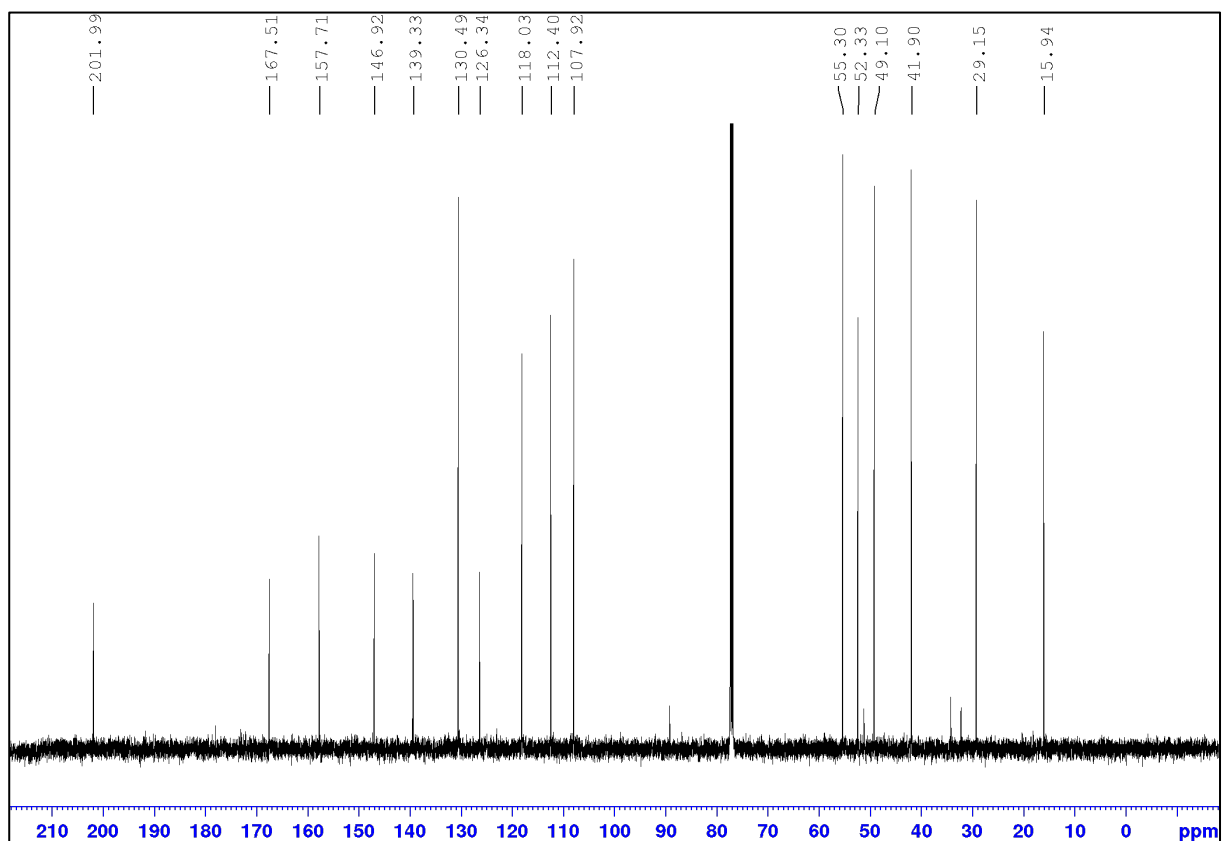



$^1\text{H}$  NMR (500 MHz,  $\text{CDCl}_3$ ) of **1a**

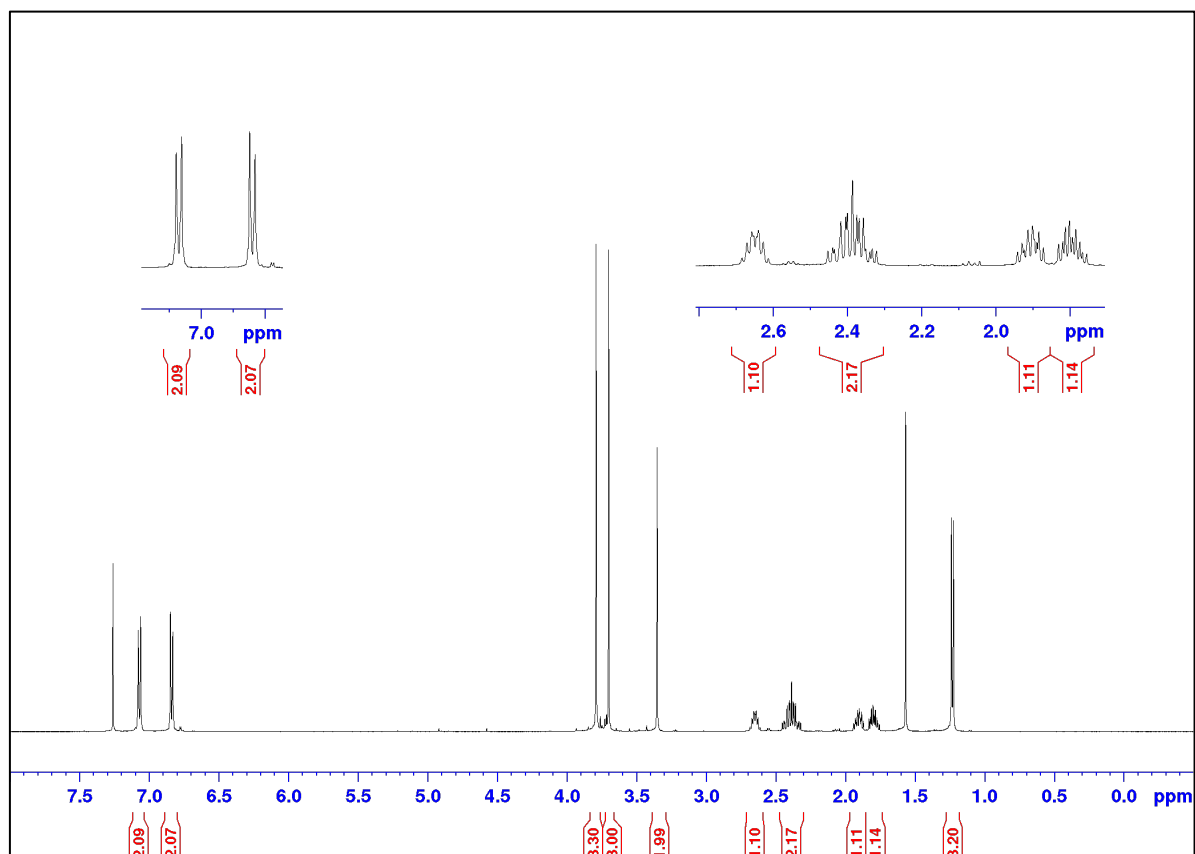

$^{13}\text{C}$  NMR (125 MHz,  $\text{CDCl}_3$ ) of **1a**

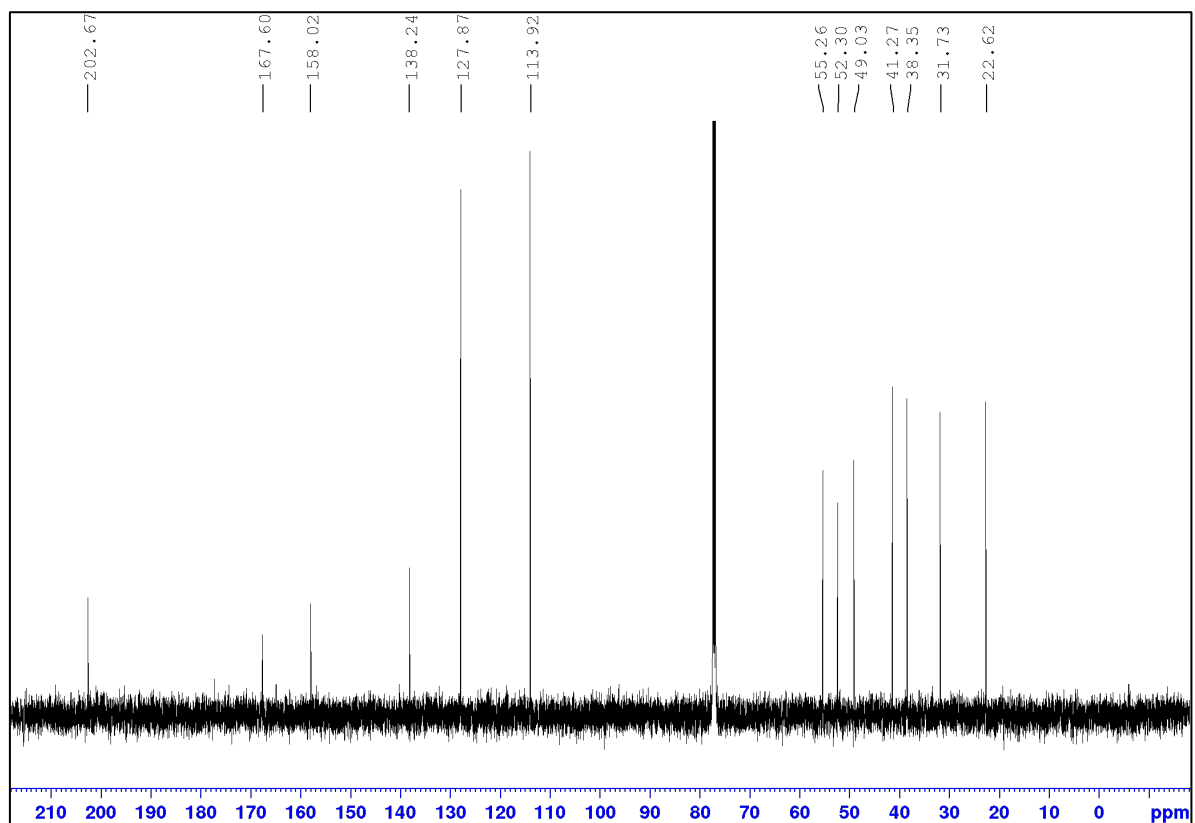

$^1\text{H}$  NMR (500 MHz,  $\text{CDCl}_3$ ) of **1b**

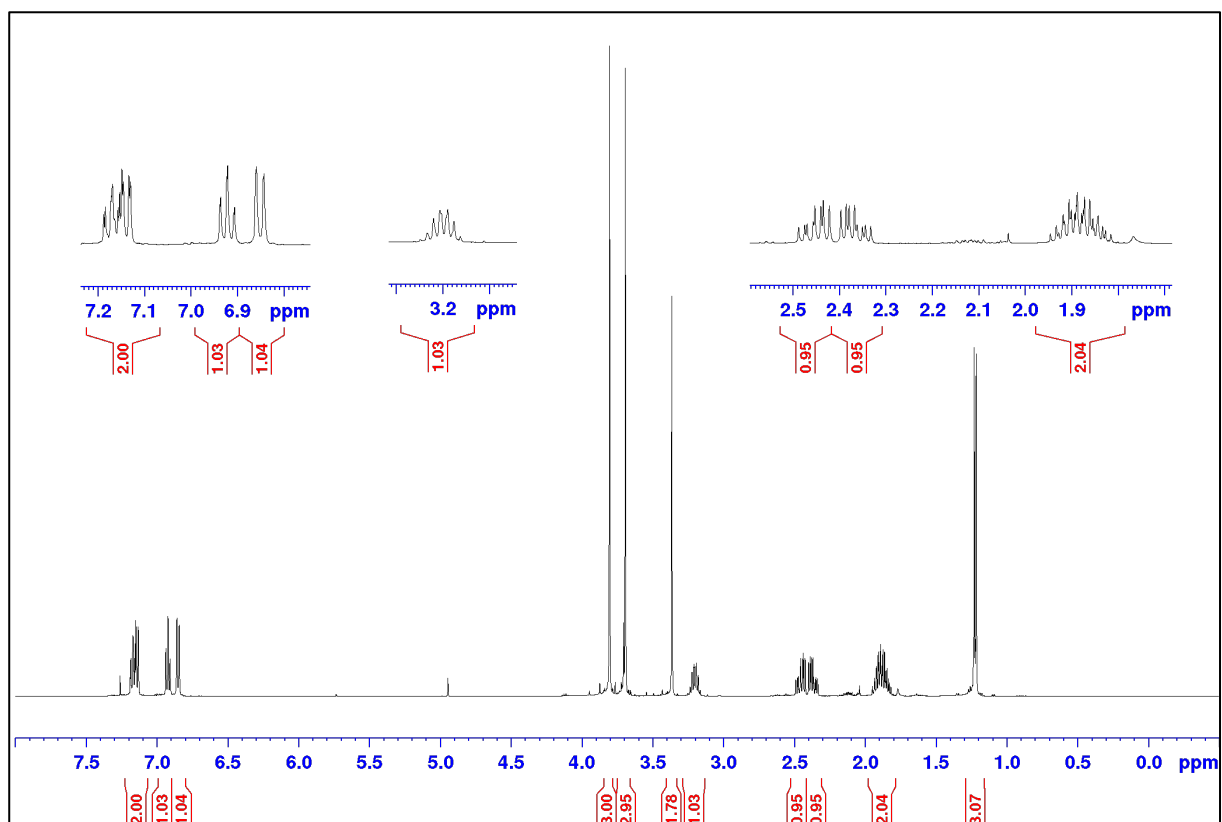

$^{13}\text{C}$  NMR (125 MHz,  $\text{CDCl}_3$ ) of **1b**

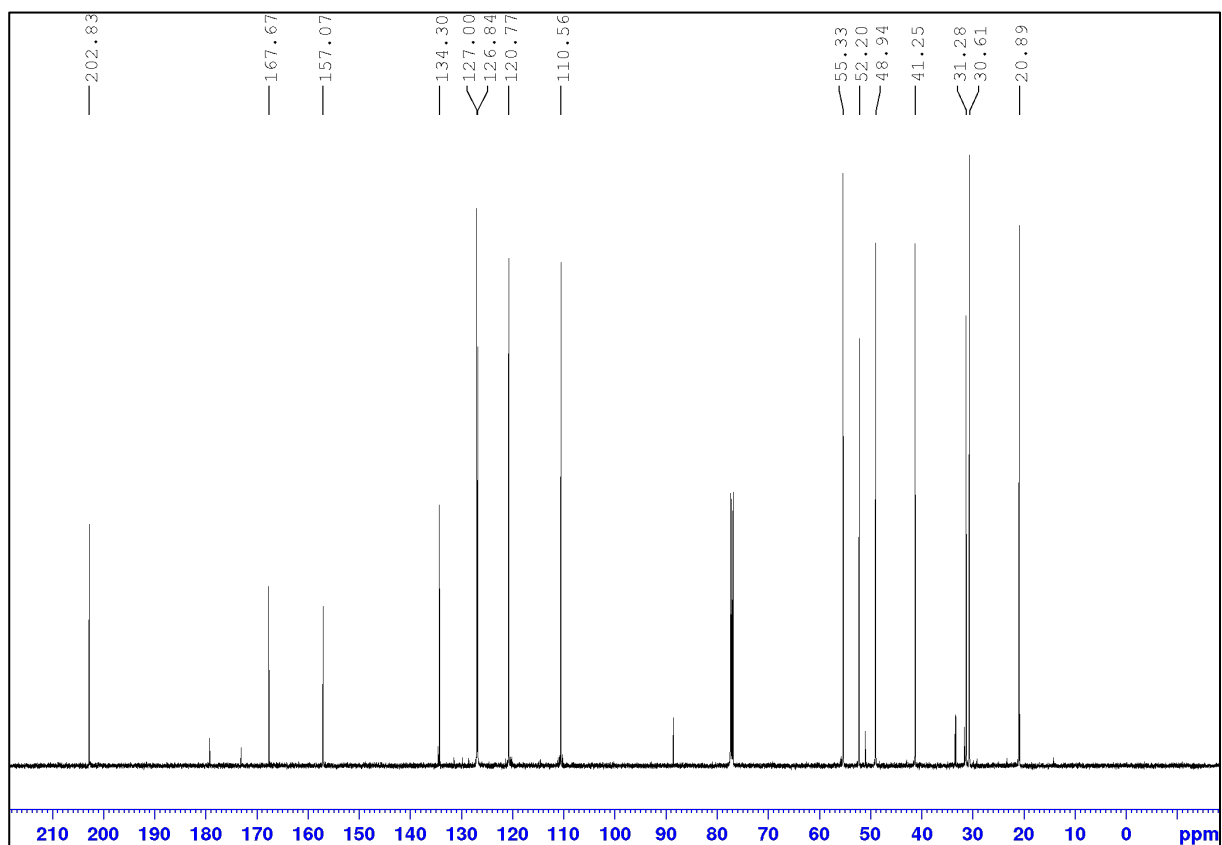

$^1\text{H}$  NMR (500 MHz,  $\text{CDCl}_3$ ) of **1c**

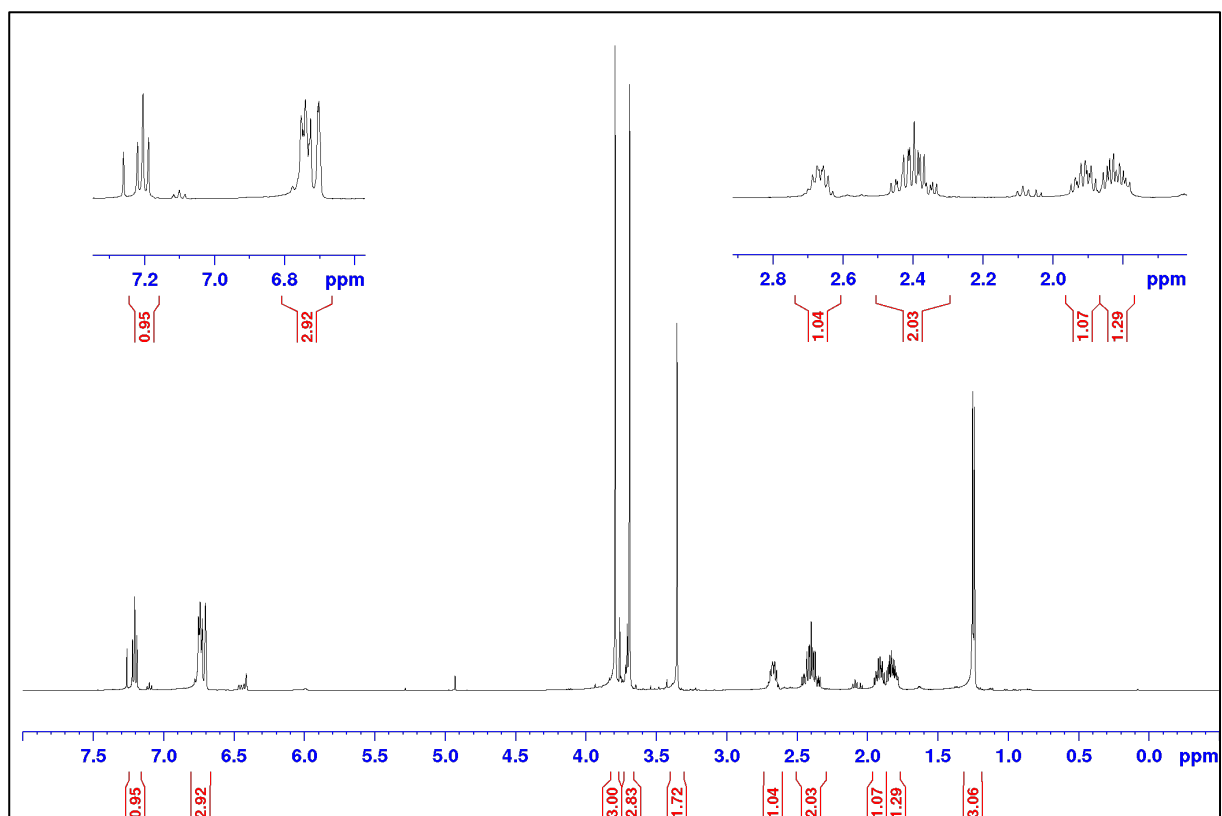

$^{13}\text{C}$  NMR (125 MHz,  $\text{CDCl}_3$ ) of **1c**

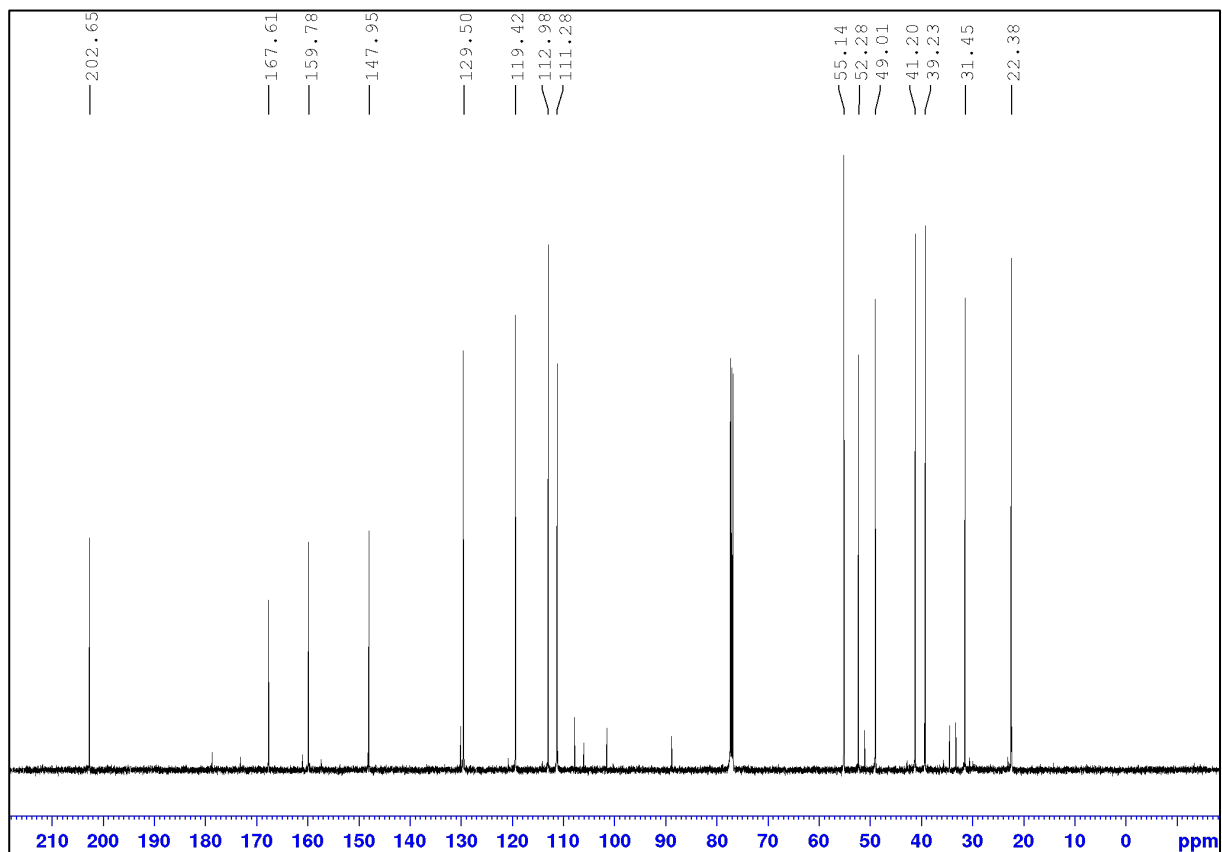

$^1\text{H}$  NMR (500 MHz,  $\text{CDCl}_3$ ) of **1d**

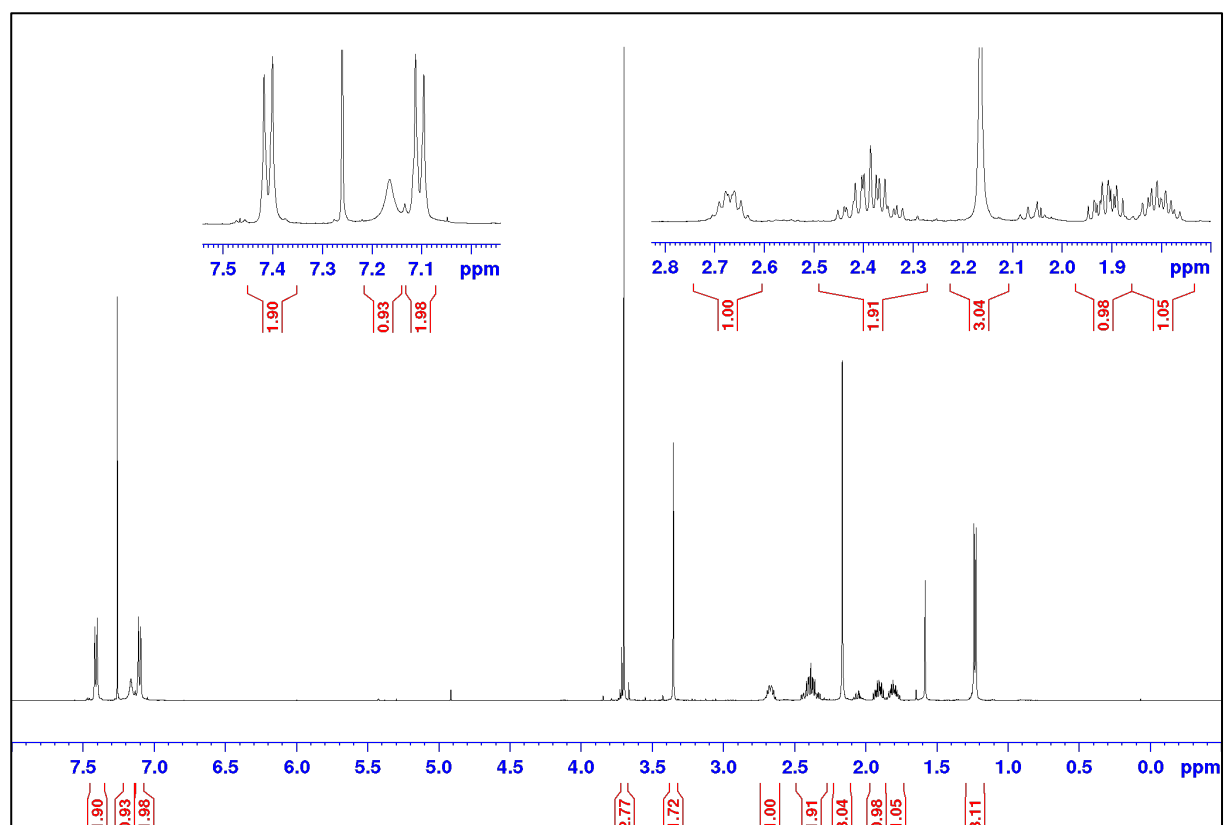

$^{13}\text{C}$  NMR (125 MHz,  $\text{CDCl}_3$ ) of **1d**

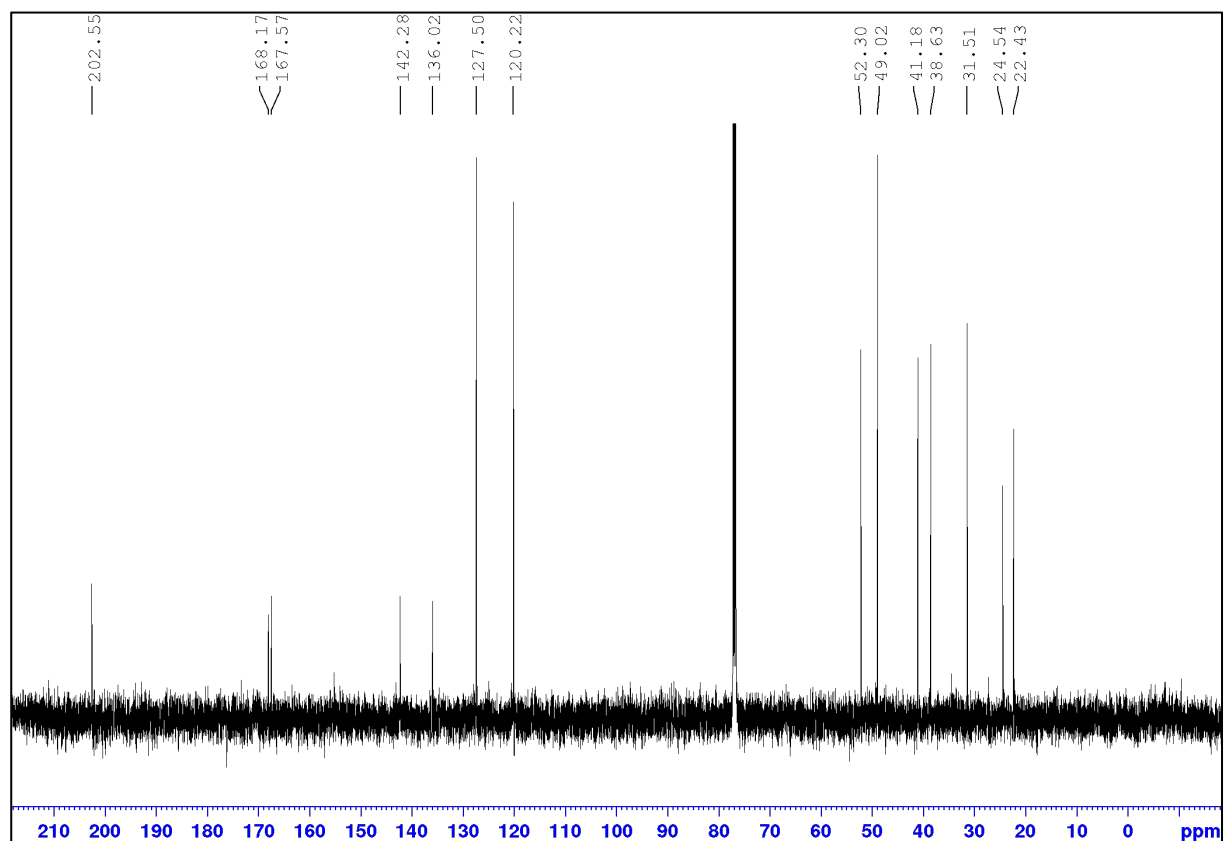

$^1\text{H}$  NMR (500 MHz,  $\text{CDCl}_3$ ) of **1e**

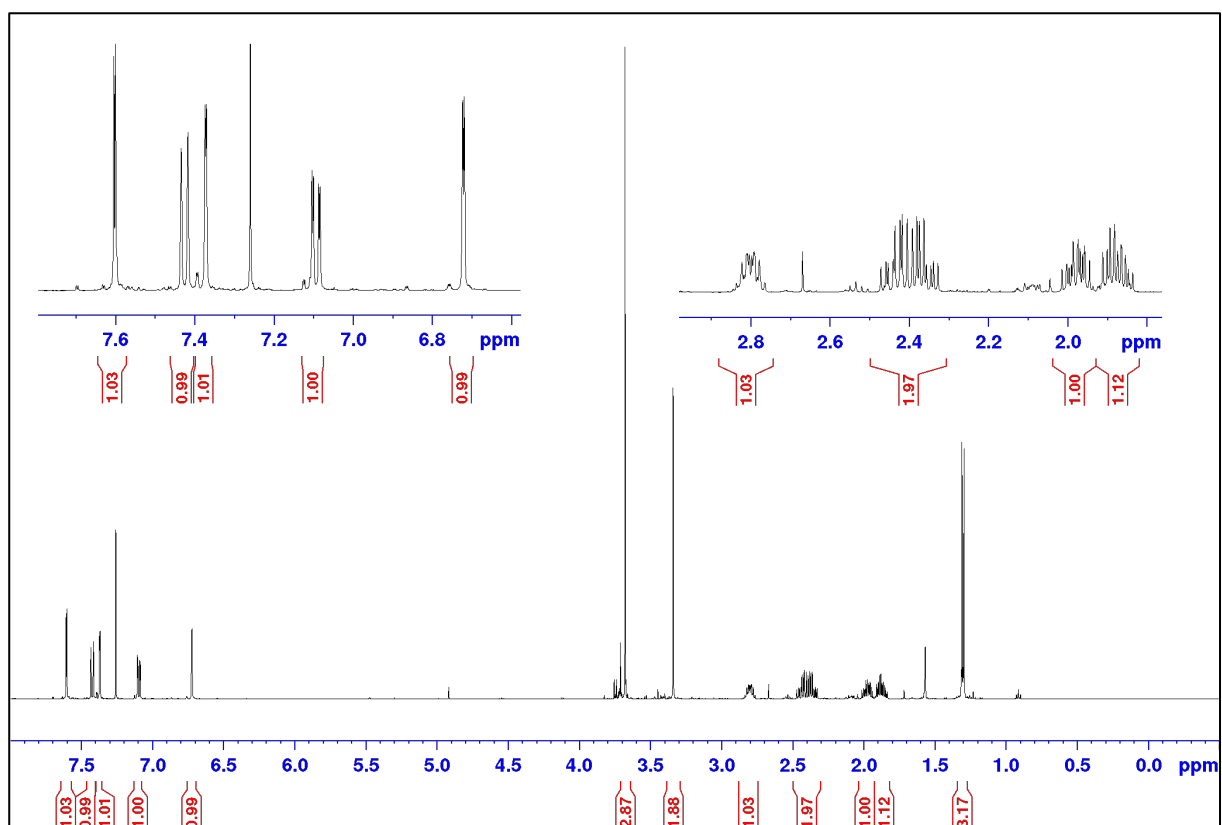

$^{13}\text{C}$  NMR (125 MHz,  $\text{CDCl}_3$ ) of **1e**

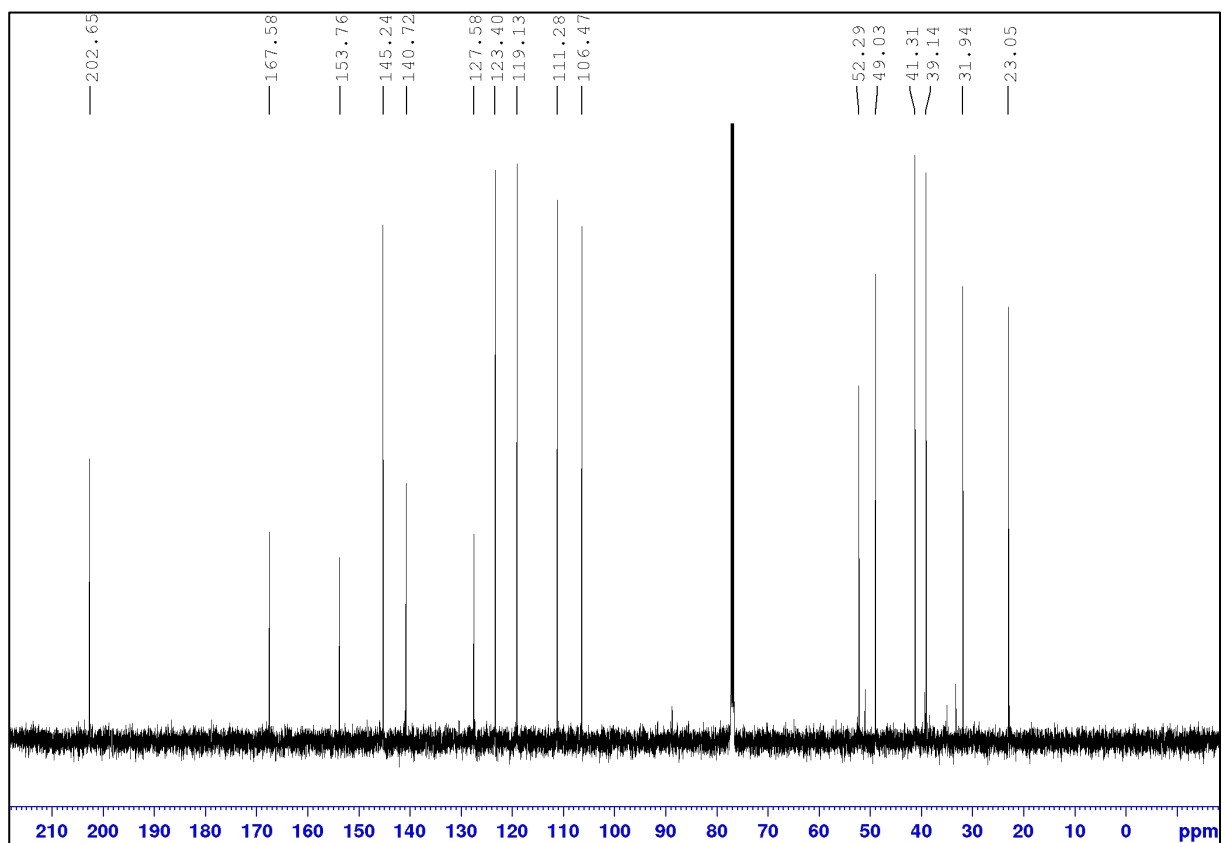

$^1\text{H}$  NMR (500 MHz,  $\text{CDCl}_3$ ) of **1f**

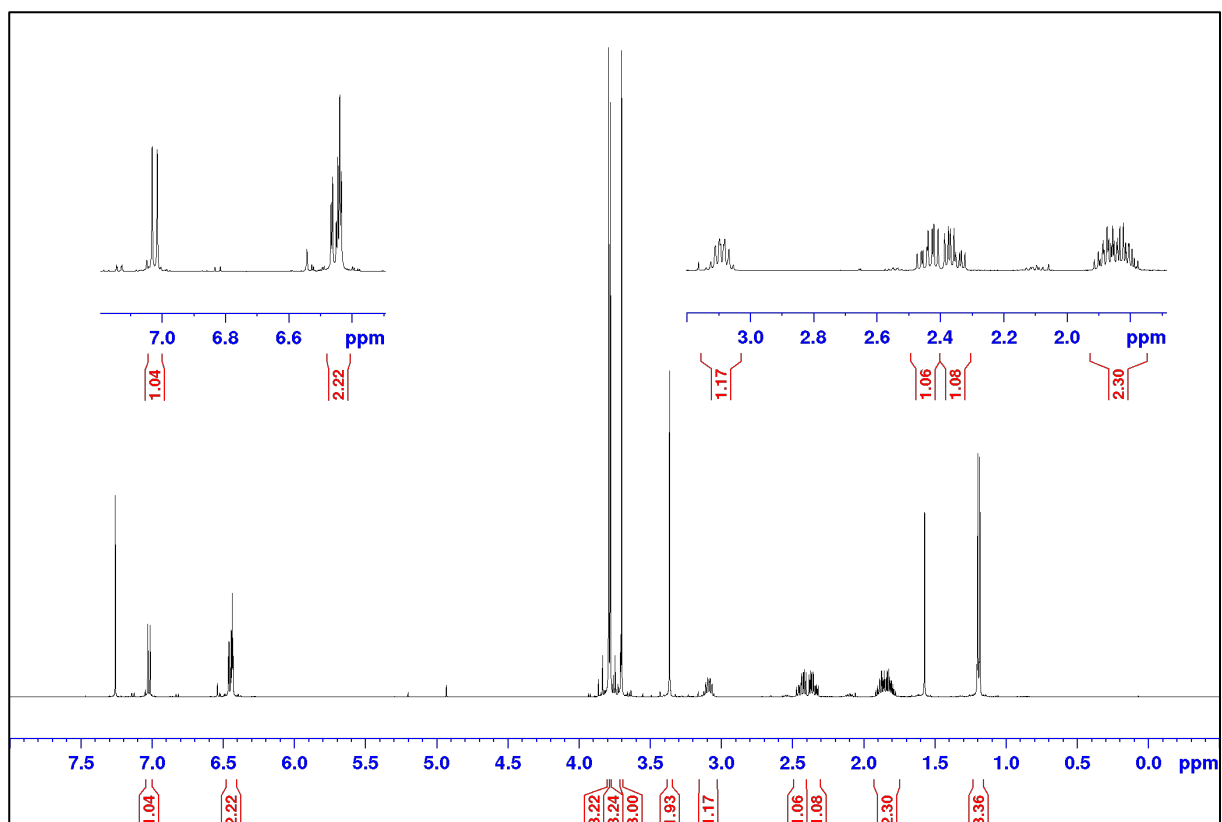

$^{13}\text{C}$  NMR (125 MHz,  $\text{CDCl}_3$ ) of **1f**

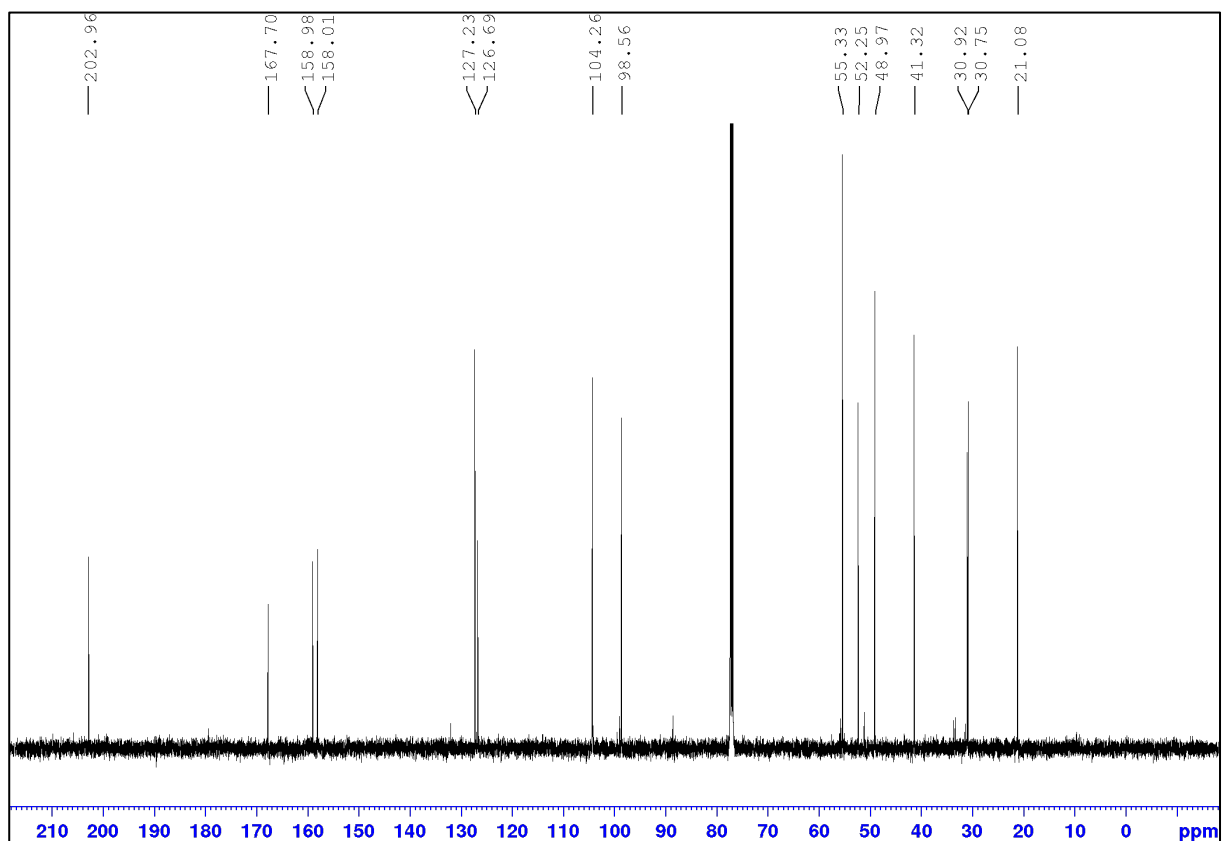

$^1\text{H}$  NMR (500 MHz,  $\text{CDCl}_3$ ) of **1g**

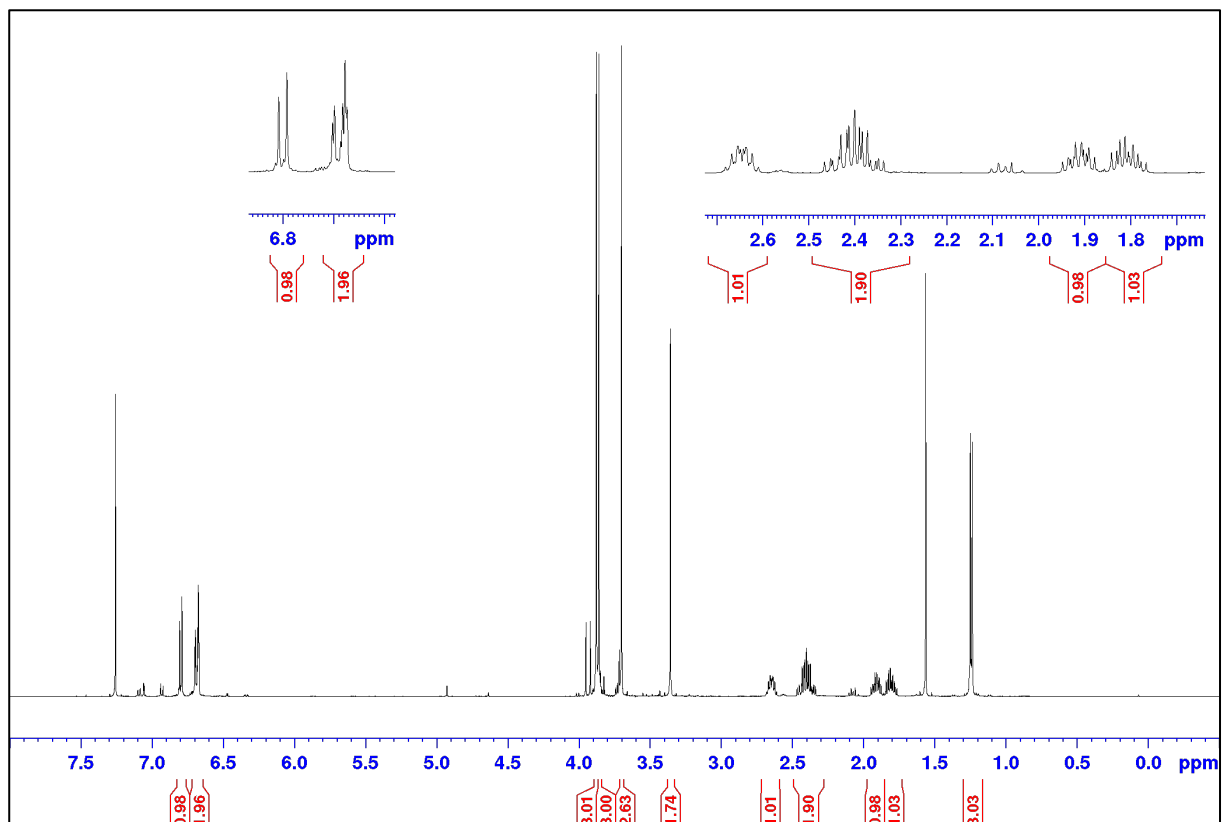

$^{13}\text{C}$  NMR (125 MHz,  $\text{CDCl}_3$ ) of **1g**

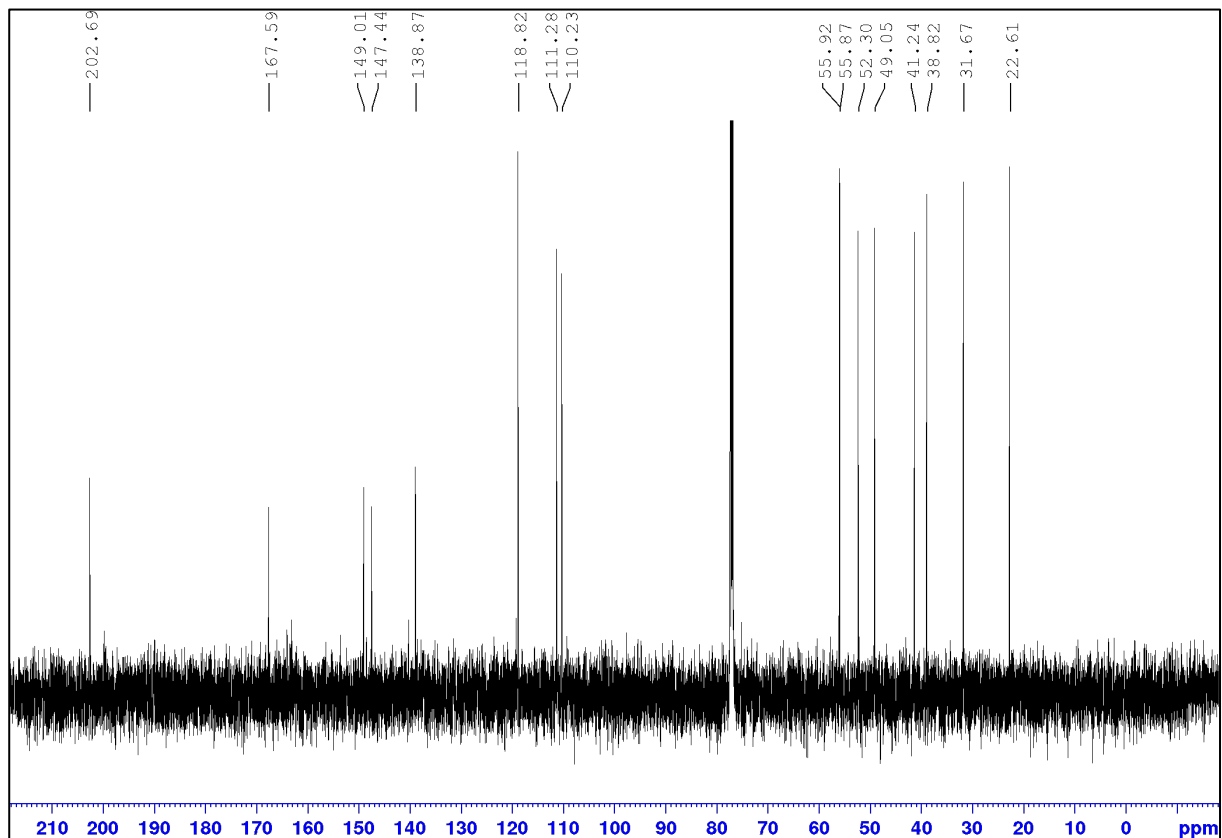

$^1\text{H}$  NMR (500 MHz,  $\text{CDCl}_3$ ) of **1h**

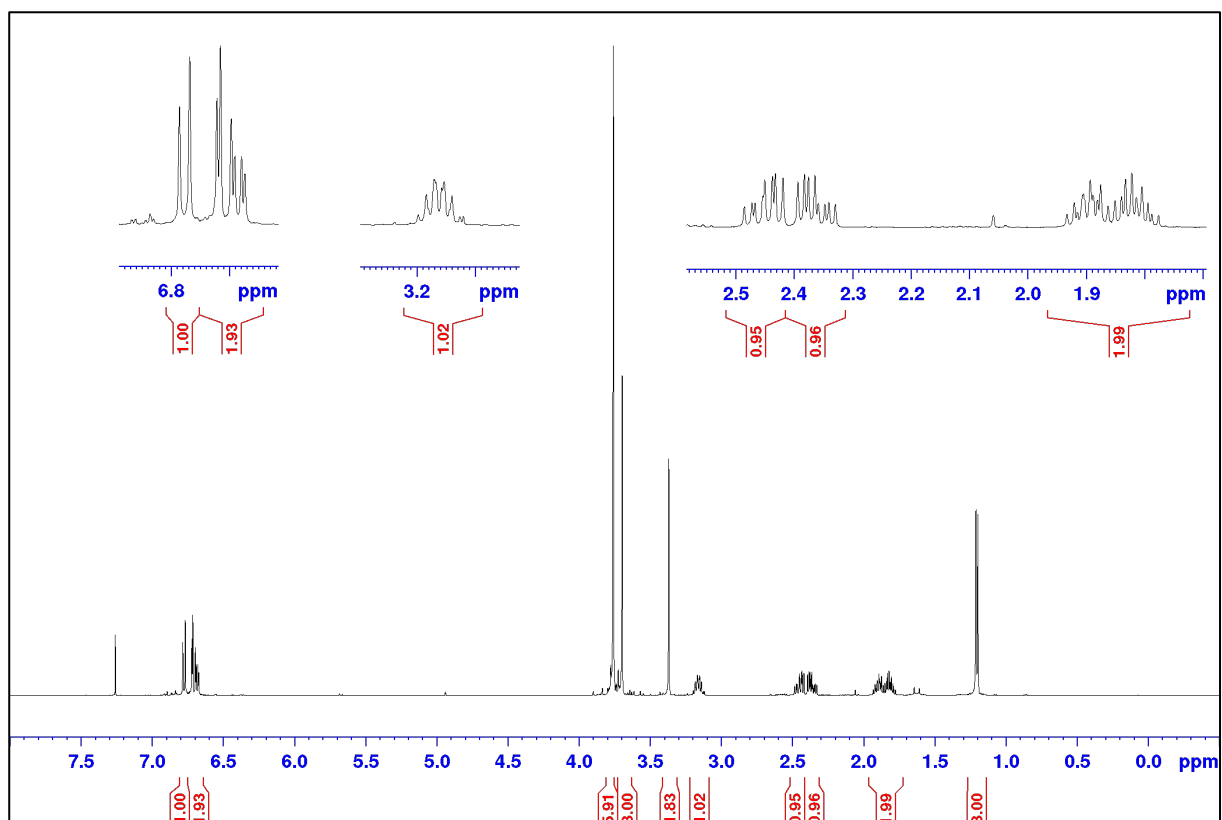

$^{13}\text{C}$  NMR (125 MHz,  $\text{CDCl}_3$ ) of **1h**

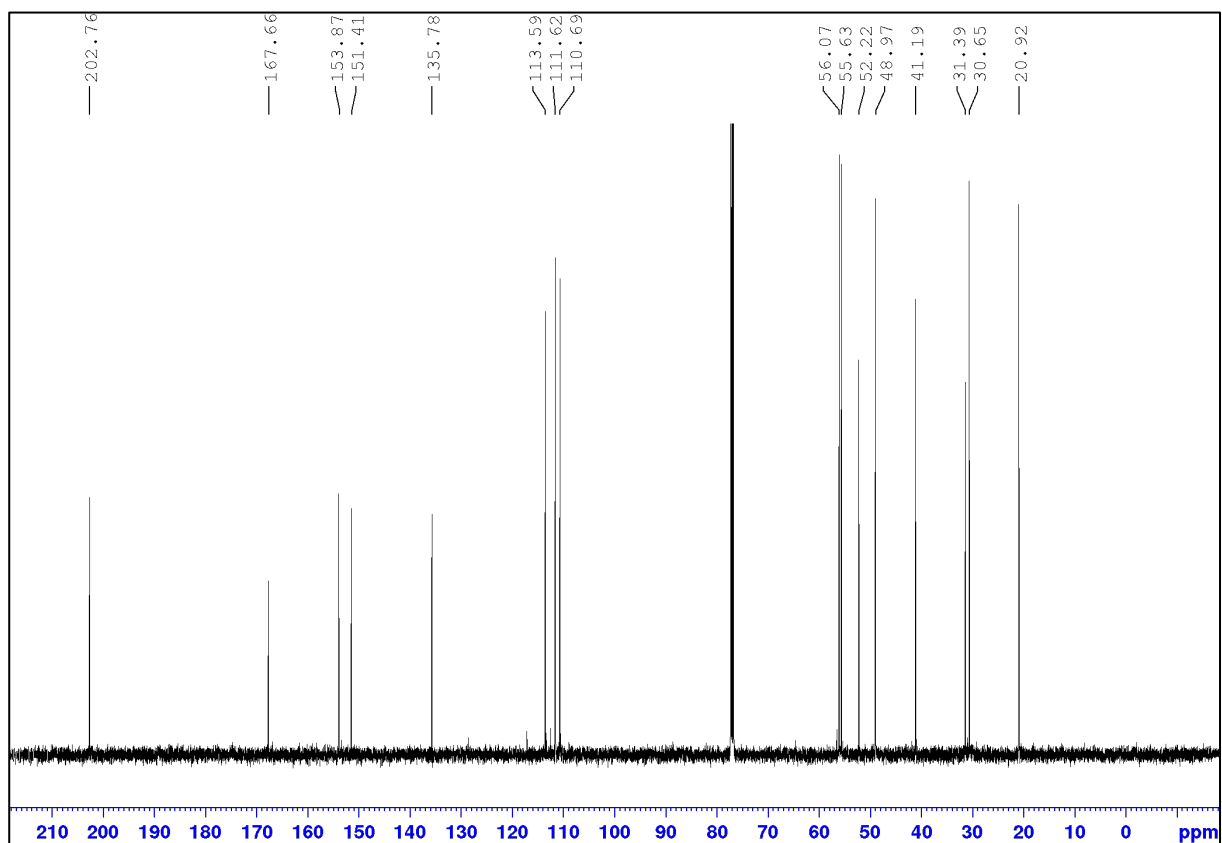



$^1\text{H}$  NMR (500 MHz,  $\text{CDCl}_3$ ) of **1i**

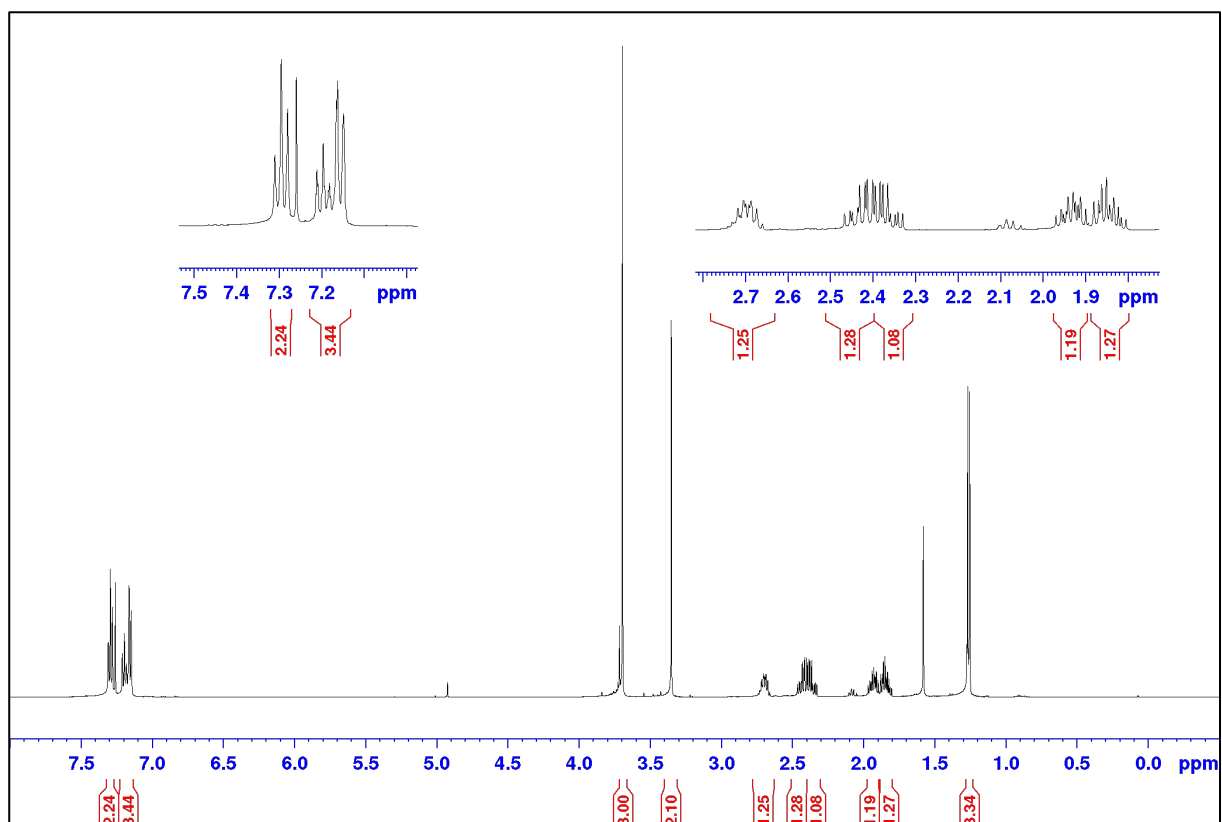

$^{13}\text{C}$  NMR (125 MHz,  $\text{CDCl}_3$ ) of **1i**

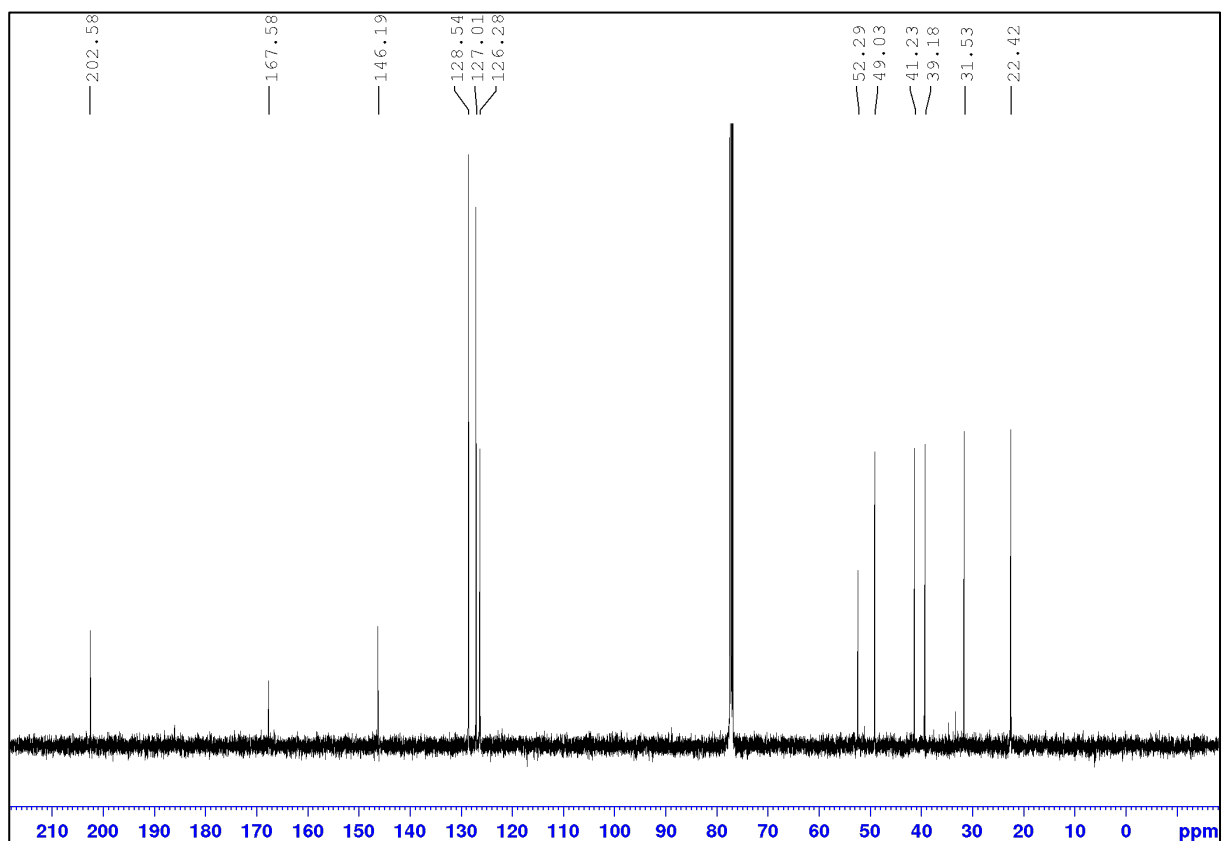

$^1\text{H}$  NMR (500 MHz,  $\text{CDCl}_3$ ) of **1j**

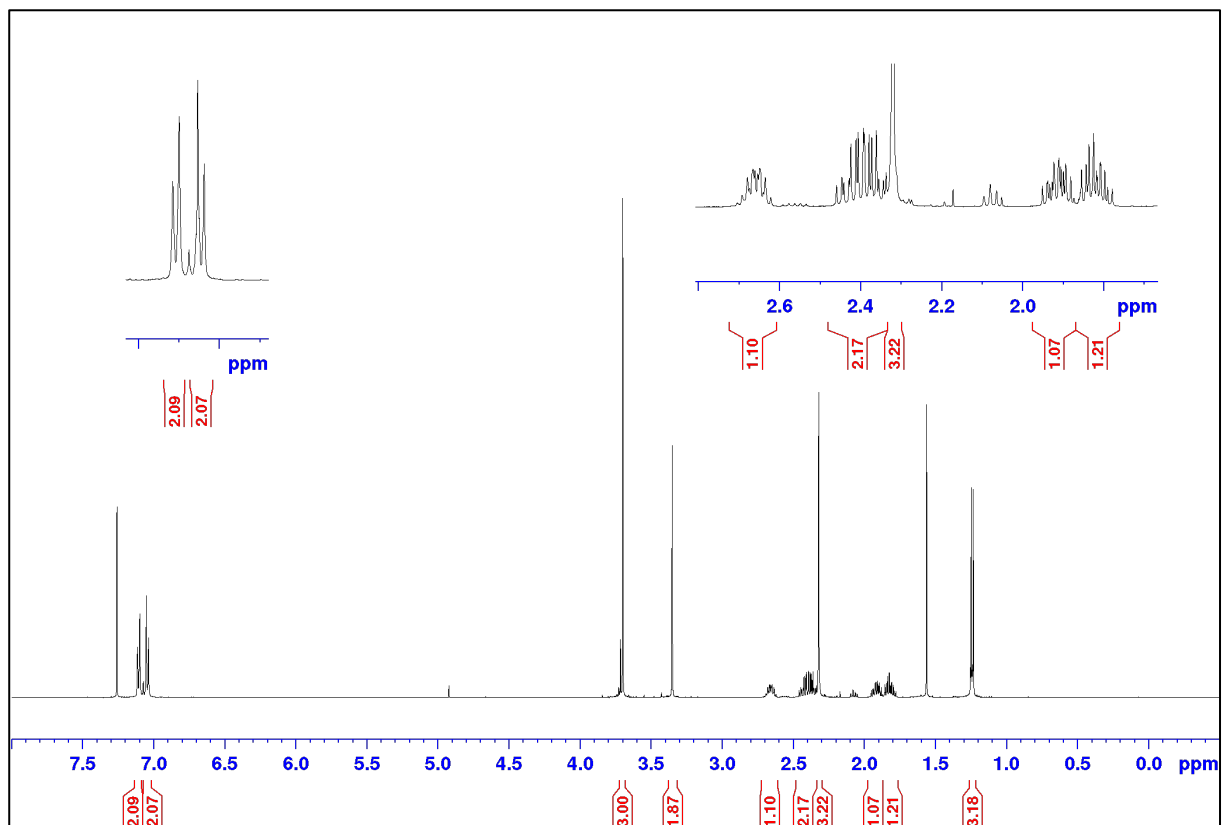

$^{13}\text{C}$  NMR (125 MHz,  $\text{CDCl}_3$ ) of **1j**

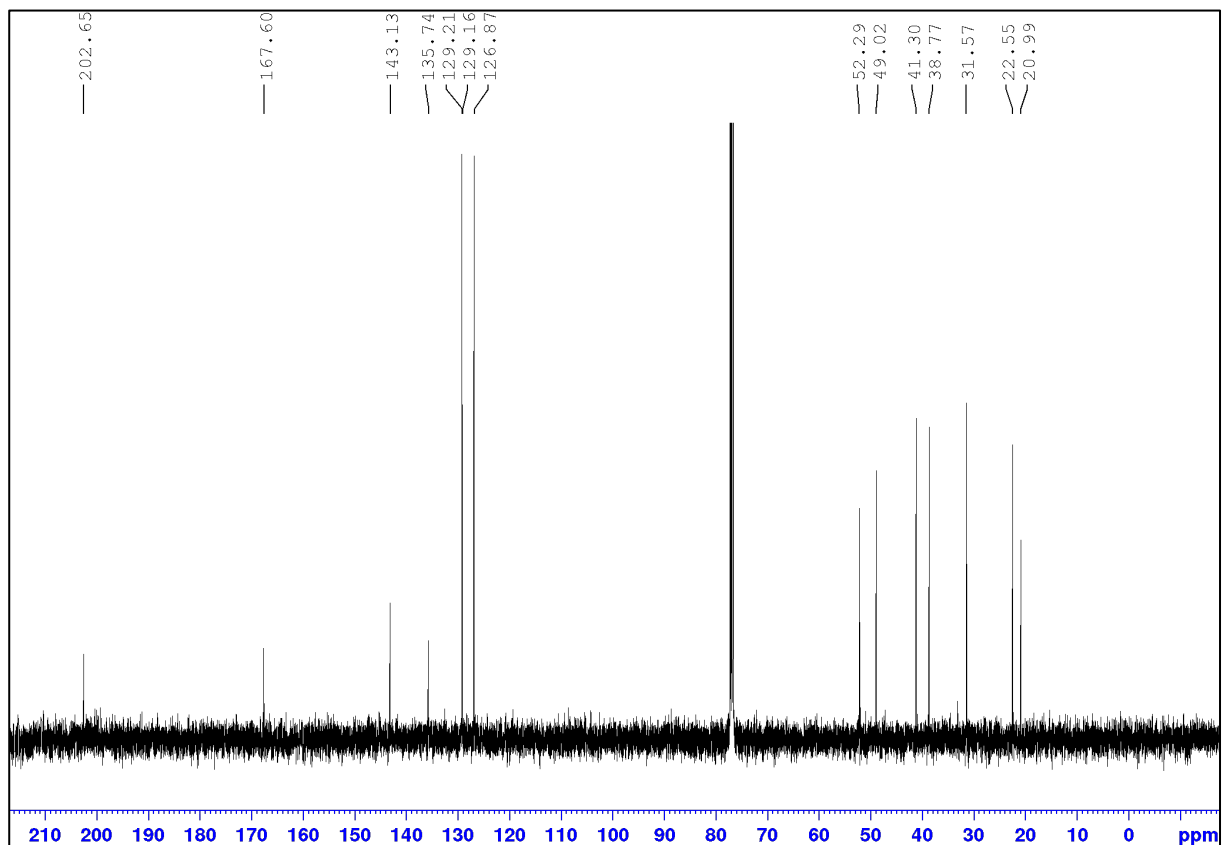

$^1\text{H}$  NMR (500 MHz,  $\text{CDCl}_3$ ) of **1k**

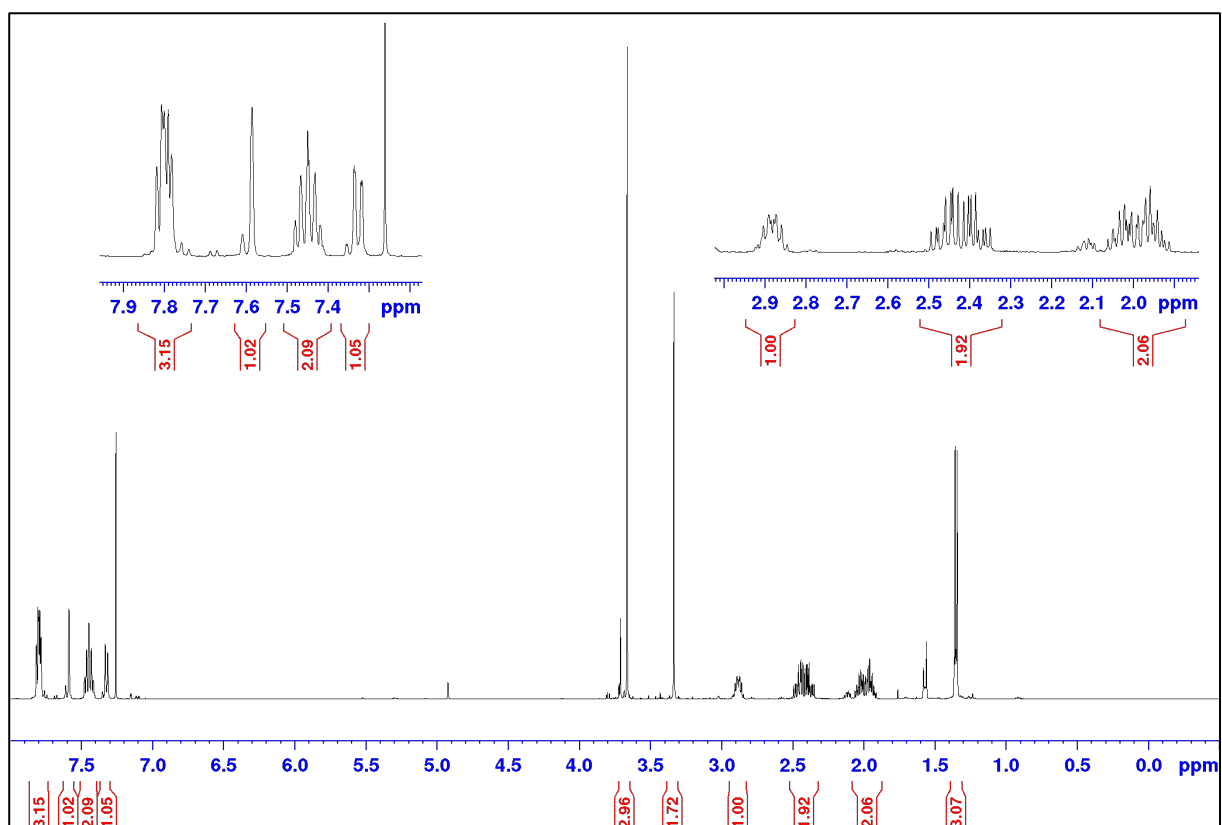

$^{13}\text{C}$  NMR (125 MHz,  $\text{CDCl}_3$ ) of **1k**

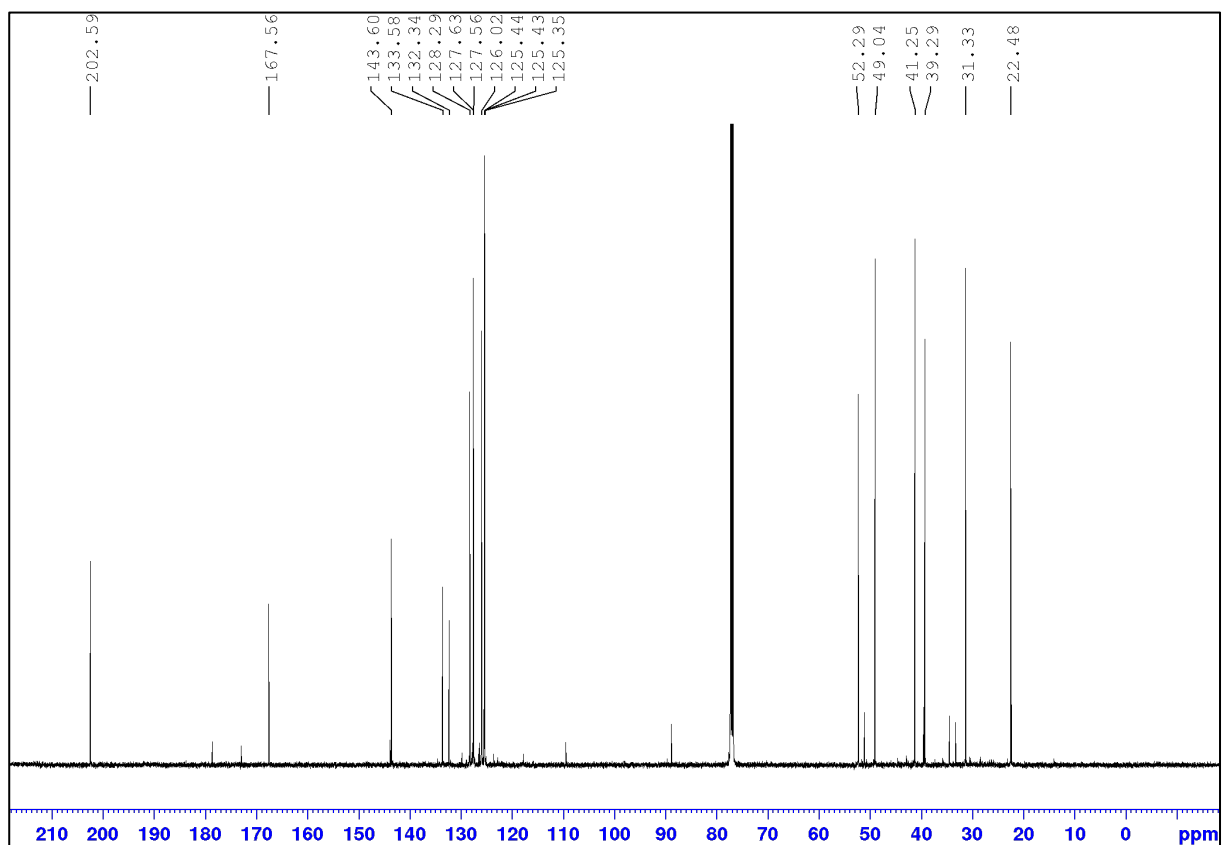

$^1\text{H}$  NMR (500 MHz,  $\text{CDCl}_3$ ) of **11**

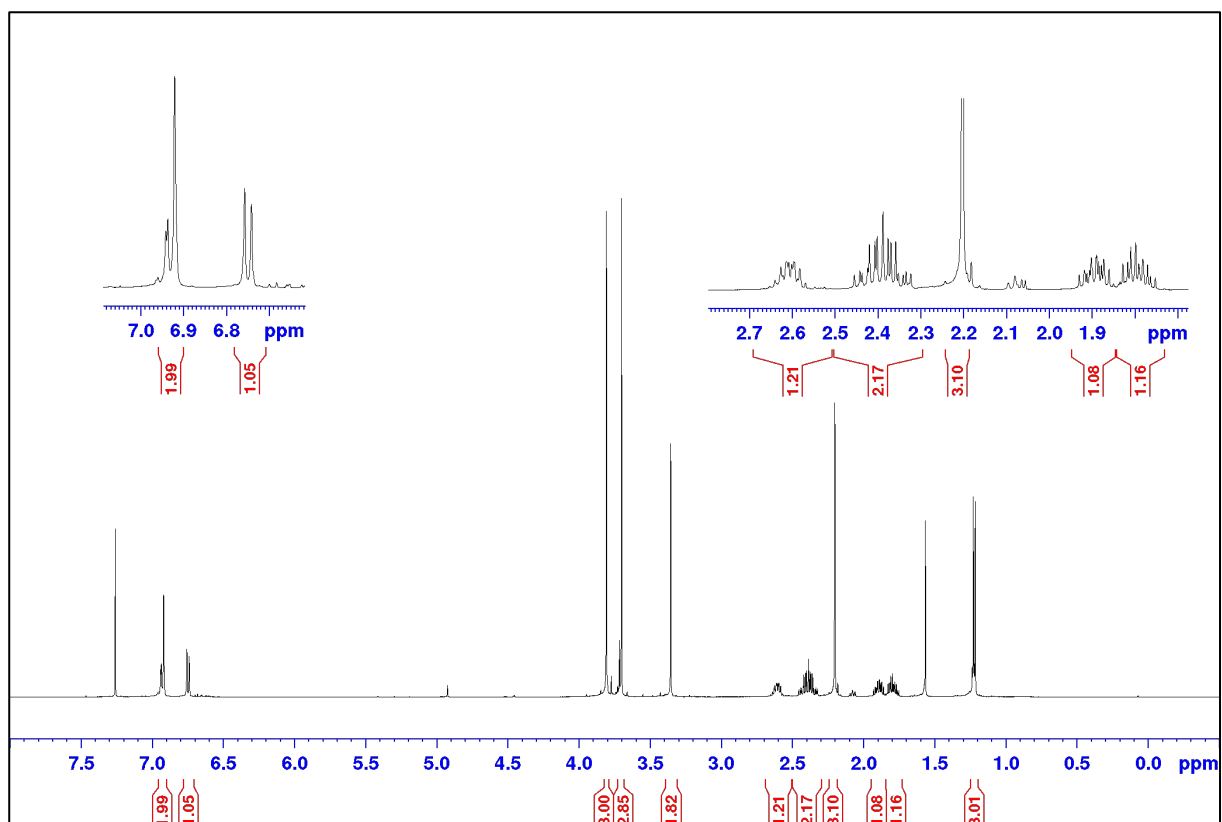

$^{13}\text{C}$  NMR (125 MHz,  $\text{CDCl}_3$ ) of **11**

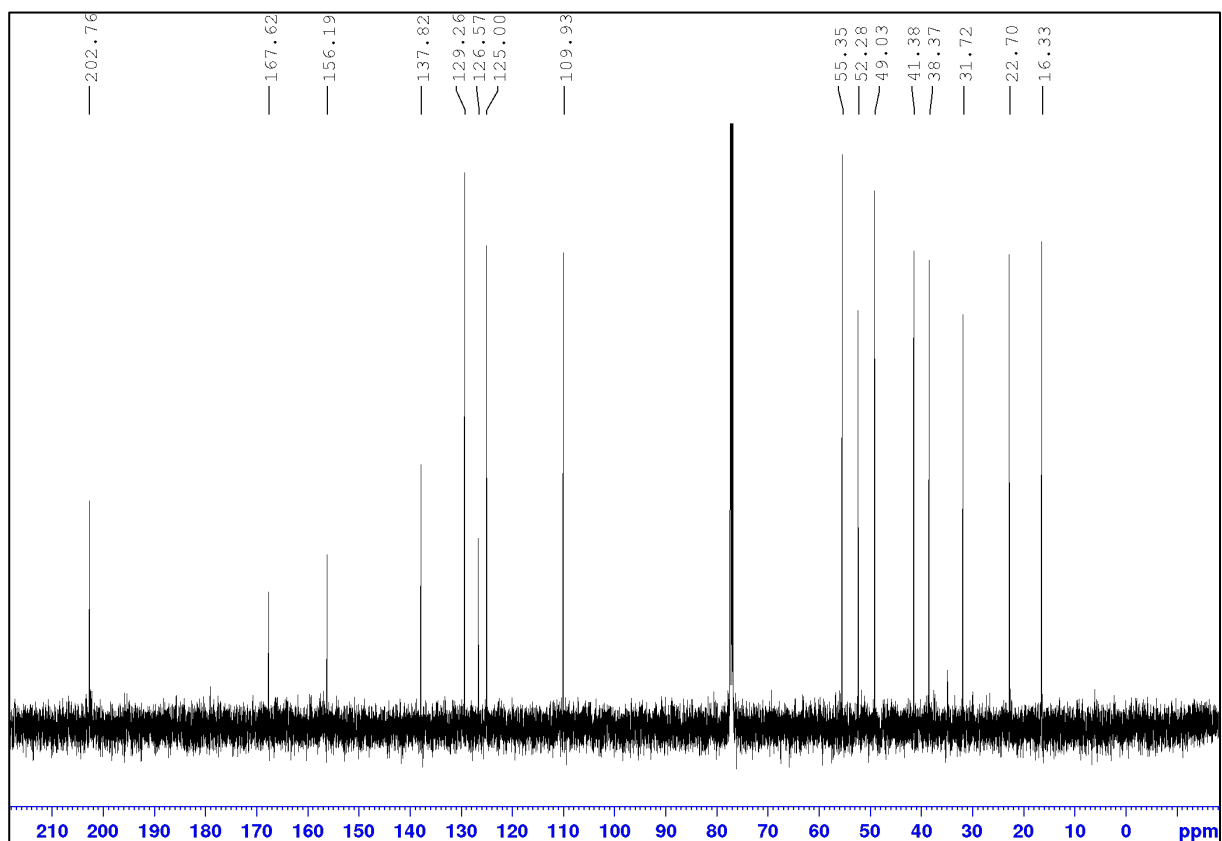

$^1\text{H}$  NMR (500 MHz,  $\text{CDCl}_3$ ) of **1m**

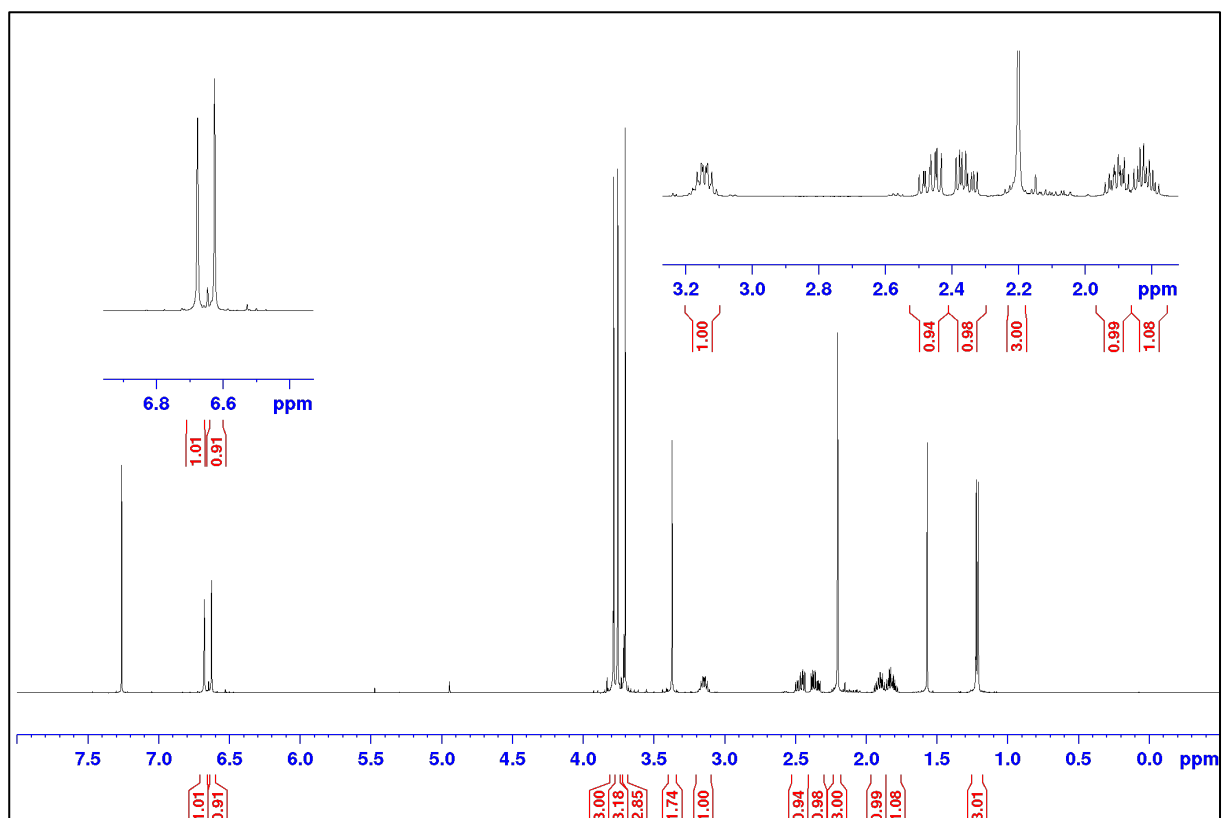

$^{13}\text{C}$  NMR (125 MHz,  $\text{CDCl}_3$ ) of **1m**

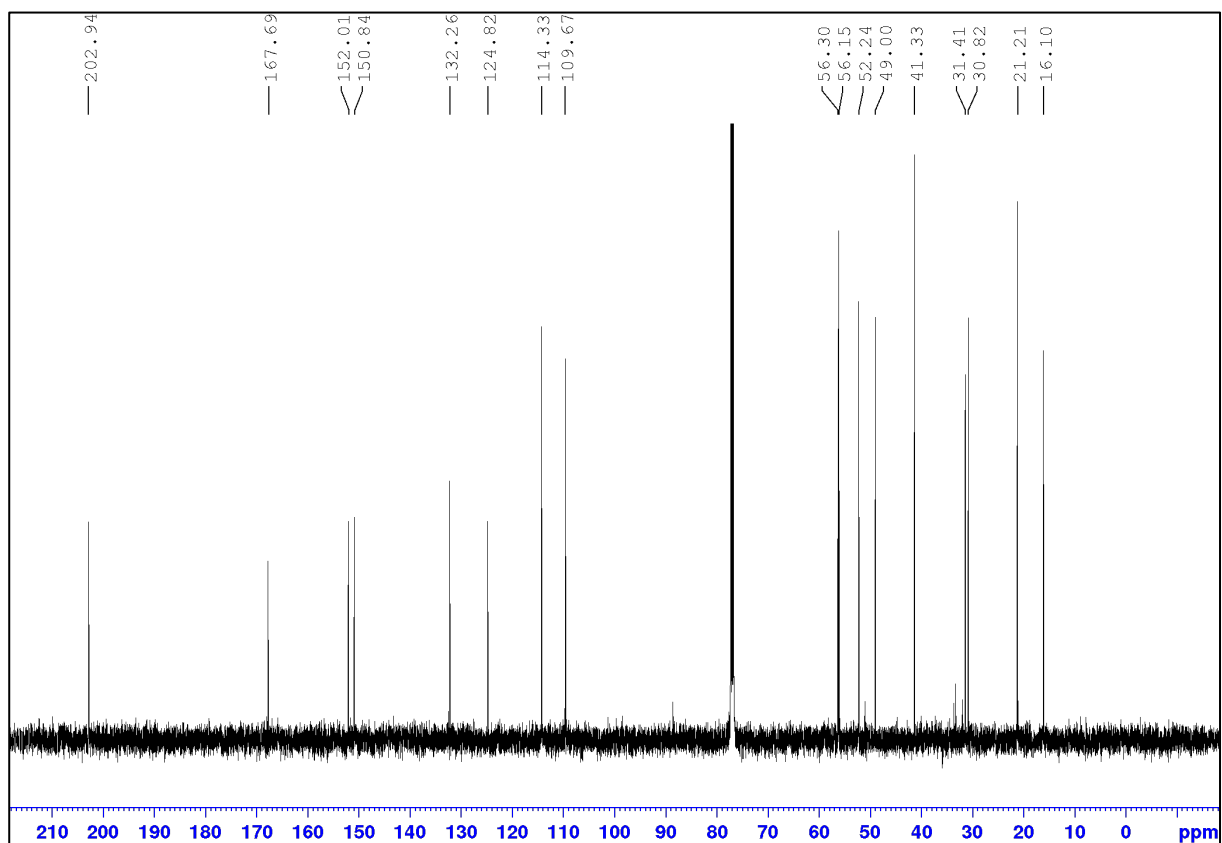

$^1\text{H}$  NMR (500 MHz,  $\text{CDCl}_3$ ) of **1n**

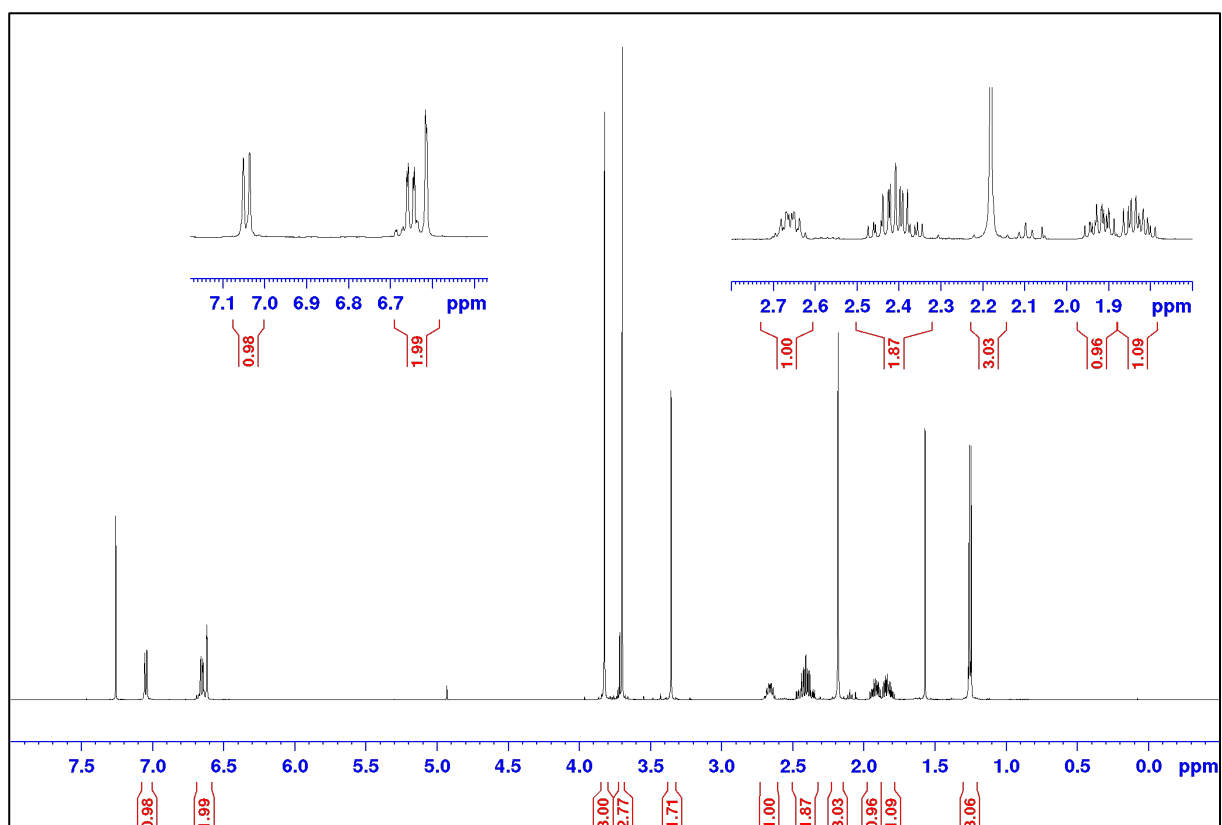

$^{13}\text{C}$  NMR (125 MHz,  $\text{CDCl}_3$ ) of **1n**

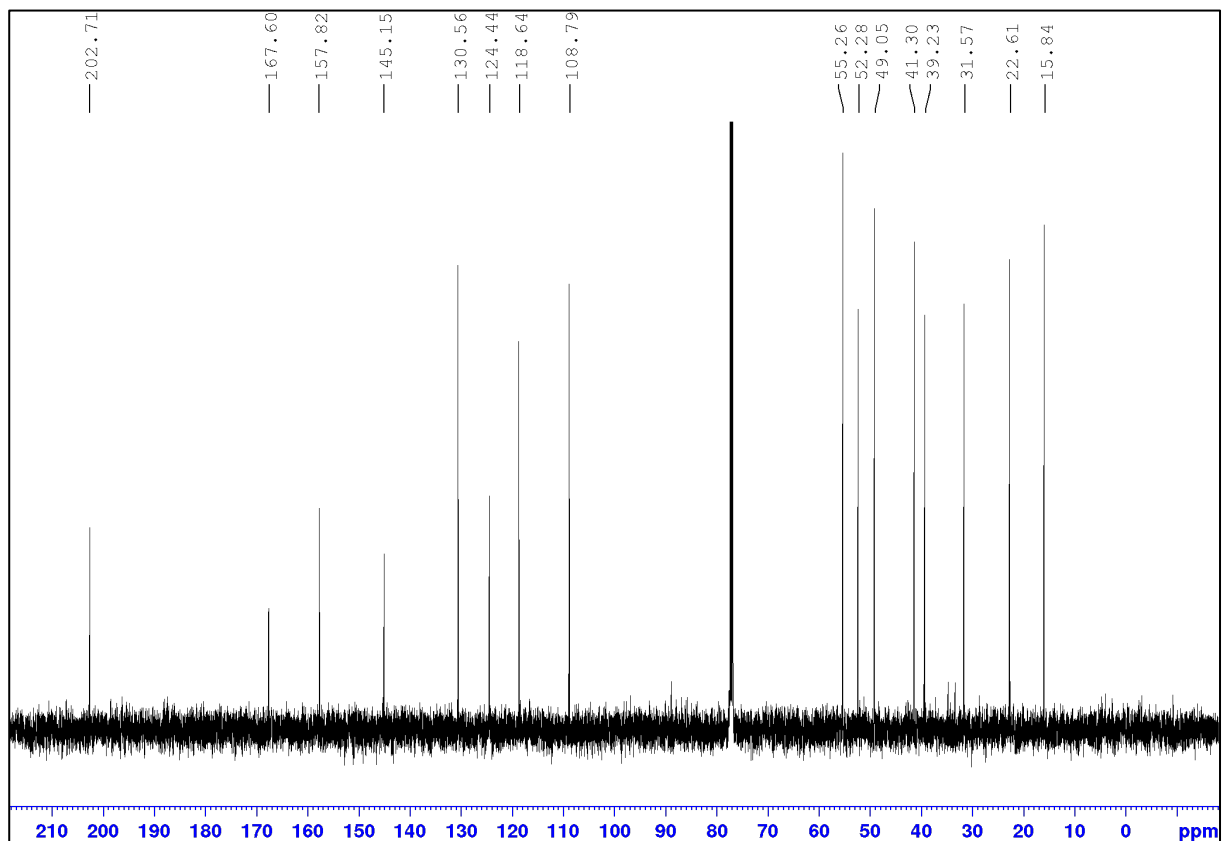

$^1\text{H}$  NMR (500 MHz,  $\text{CDCl}_3$ ) of (*E*)-**2a**

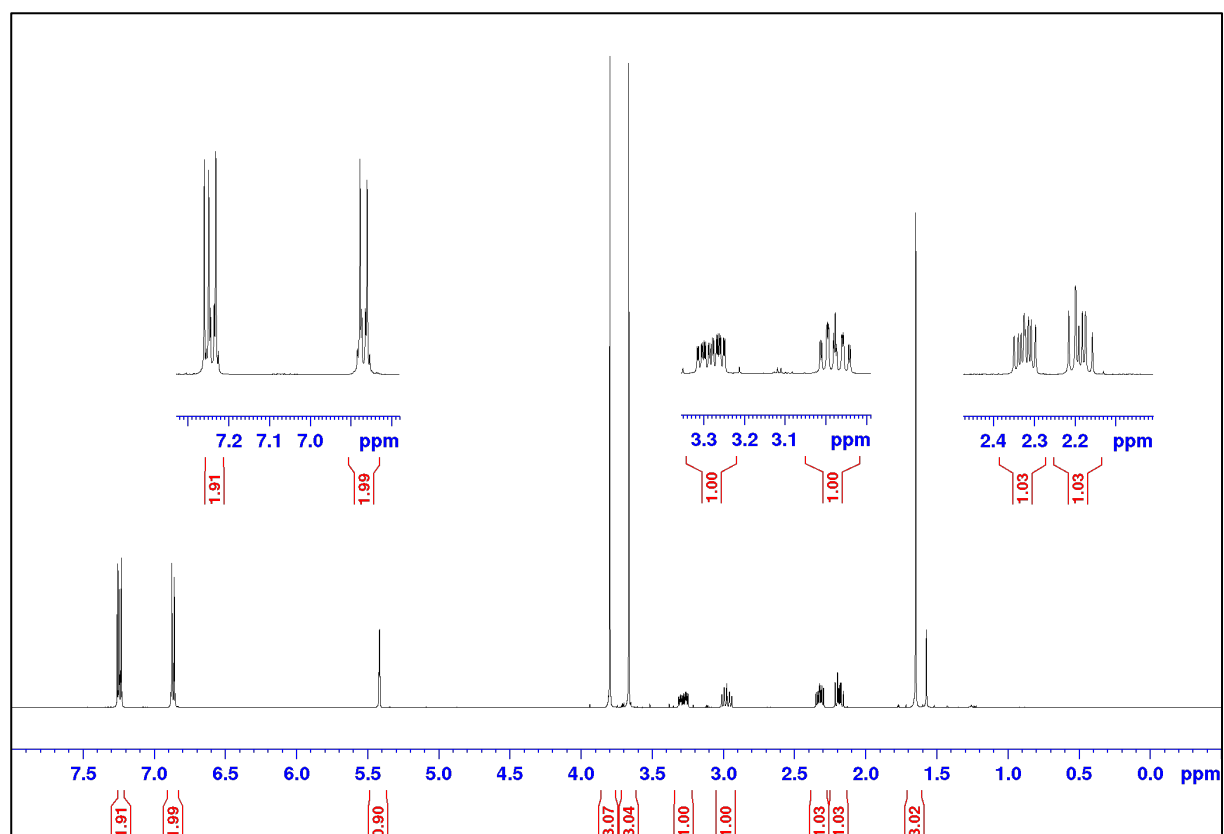

$^{13}\text{C}$  NMR (125 MHz,  $\text{CDCl}_3$ ) of (*E*)-**2a**

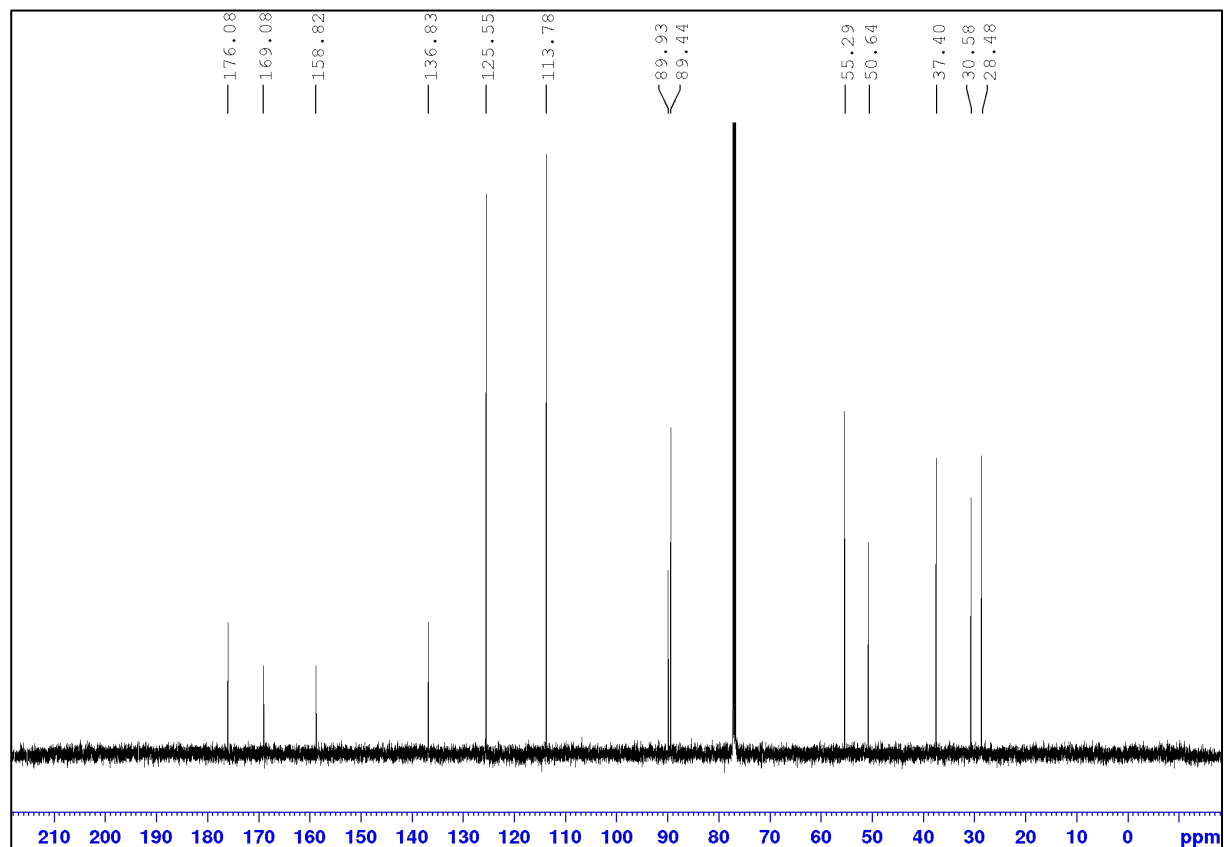

$^1\text{H}$  NMR (500 MHz,  $\text{CDCl}_3$ ) of (Z)-2a

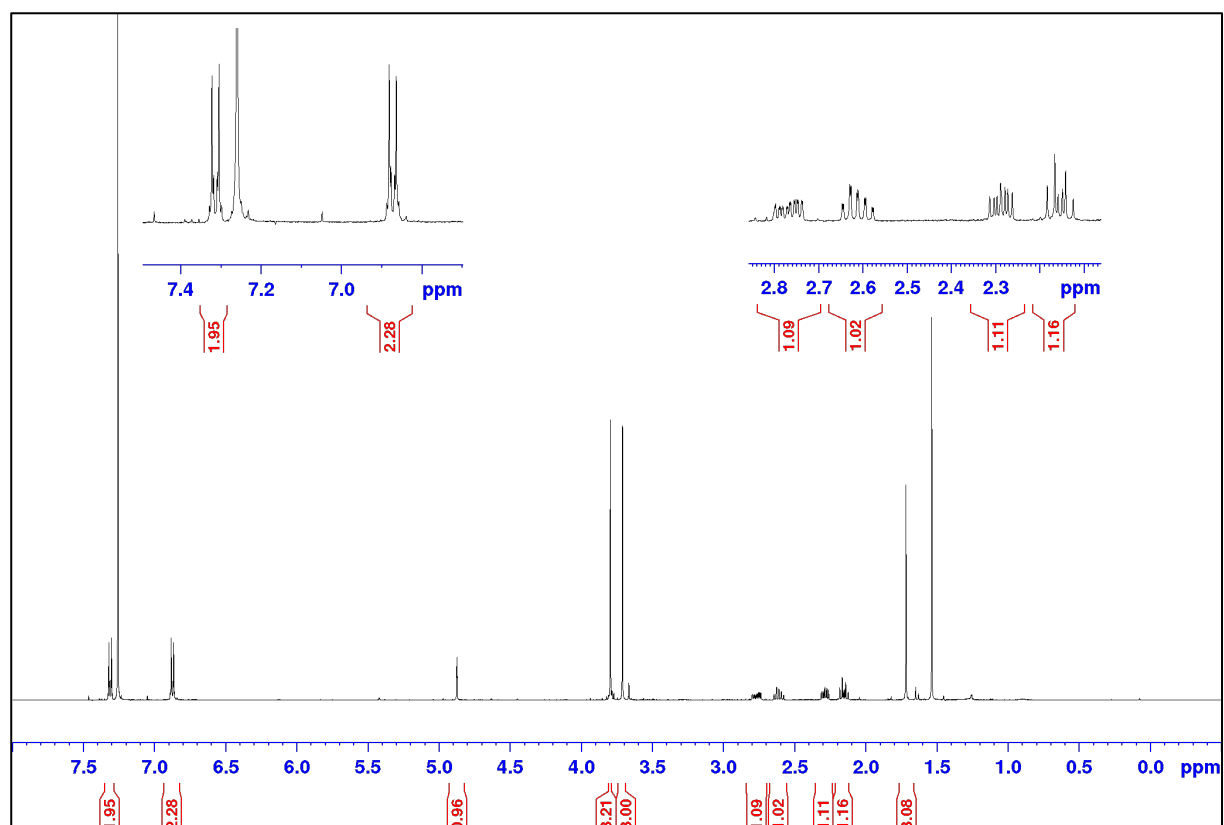

$^{13}\text{C}$  NMR (125 MHz,  $\text{CDCl}_3$ ) of (Z)-2a

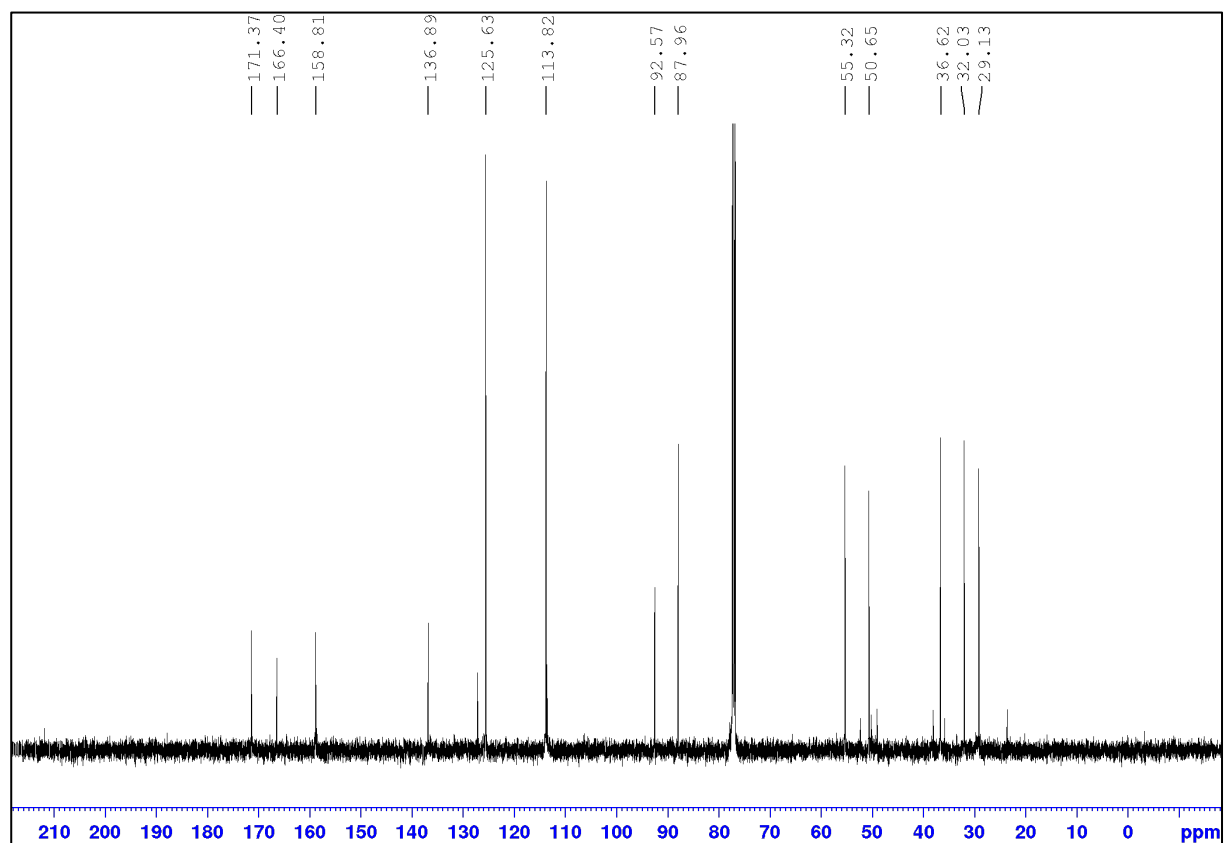



$^1\text{H}$  NMR (500 MHz,  $\text{CDCl}_3$ ) of (*E*)-**2d**

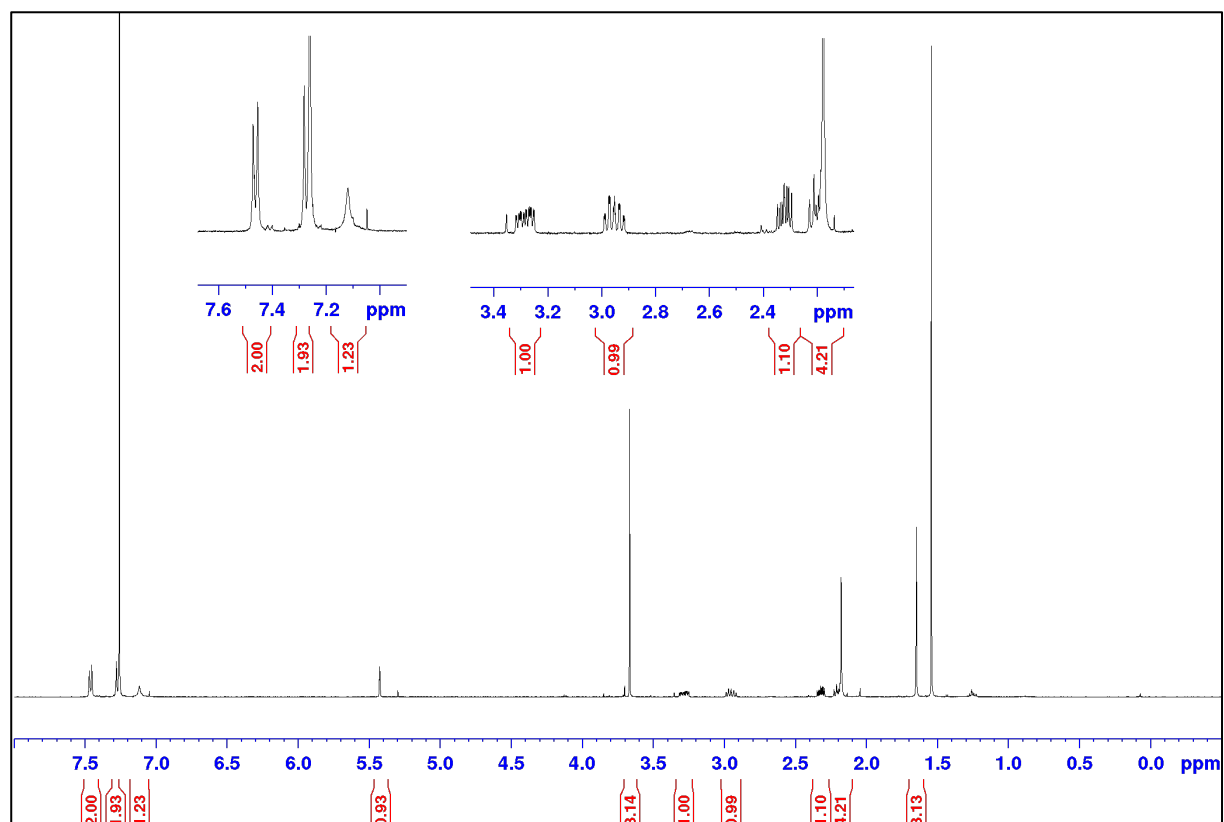

$^{13}\text{C}$  NMR (125 MHz,  $\text{CDCl}_3$ ) of (*E*)-**2d**

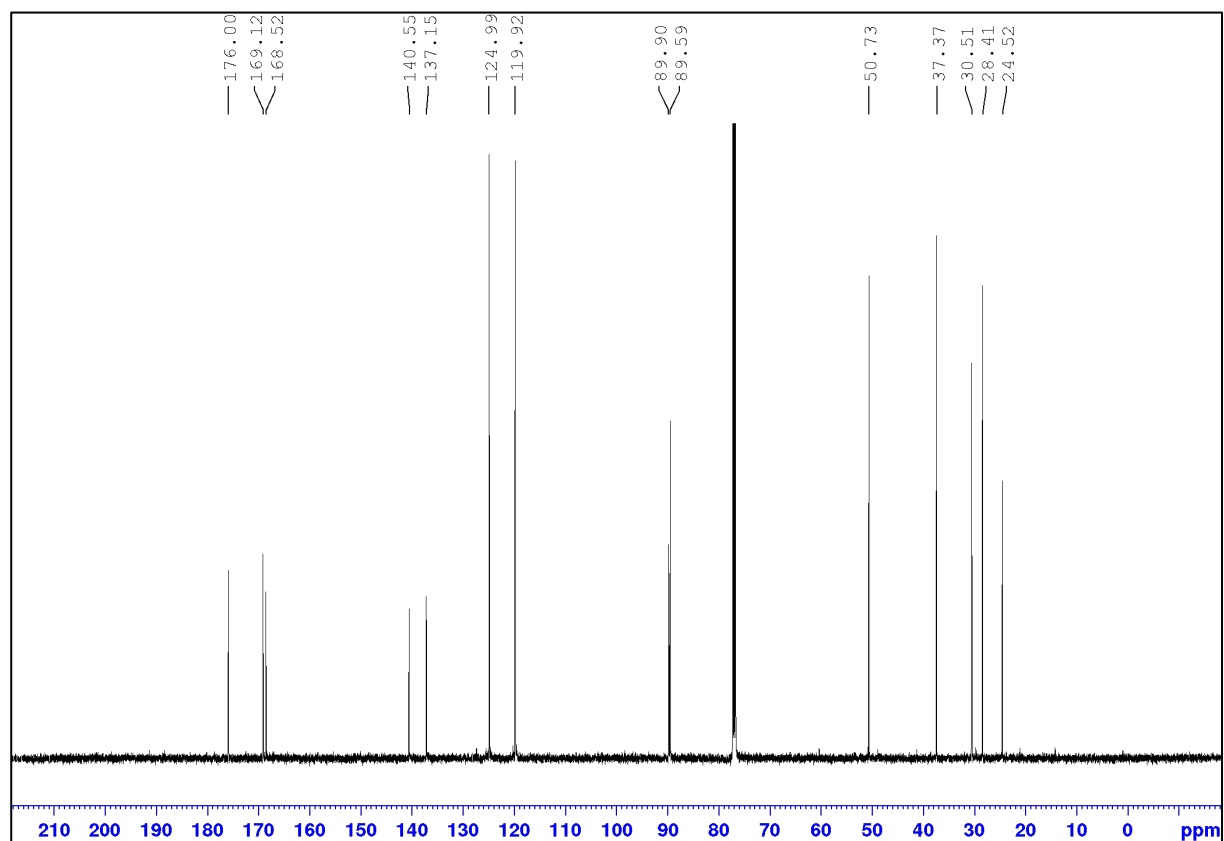

$^1\text{H}$  NMR (500 MHz,  $\text{CDCl}_3$ ) of (*E*)-**2e**

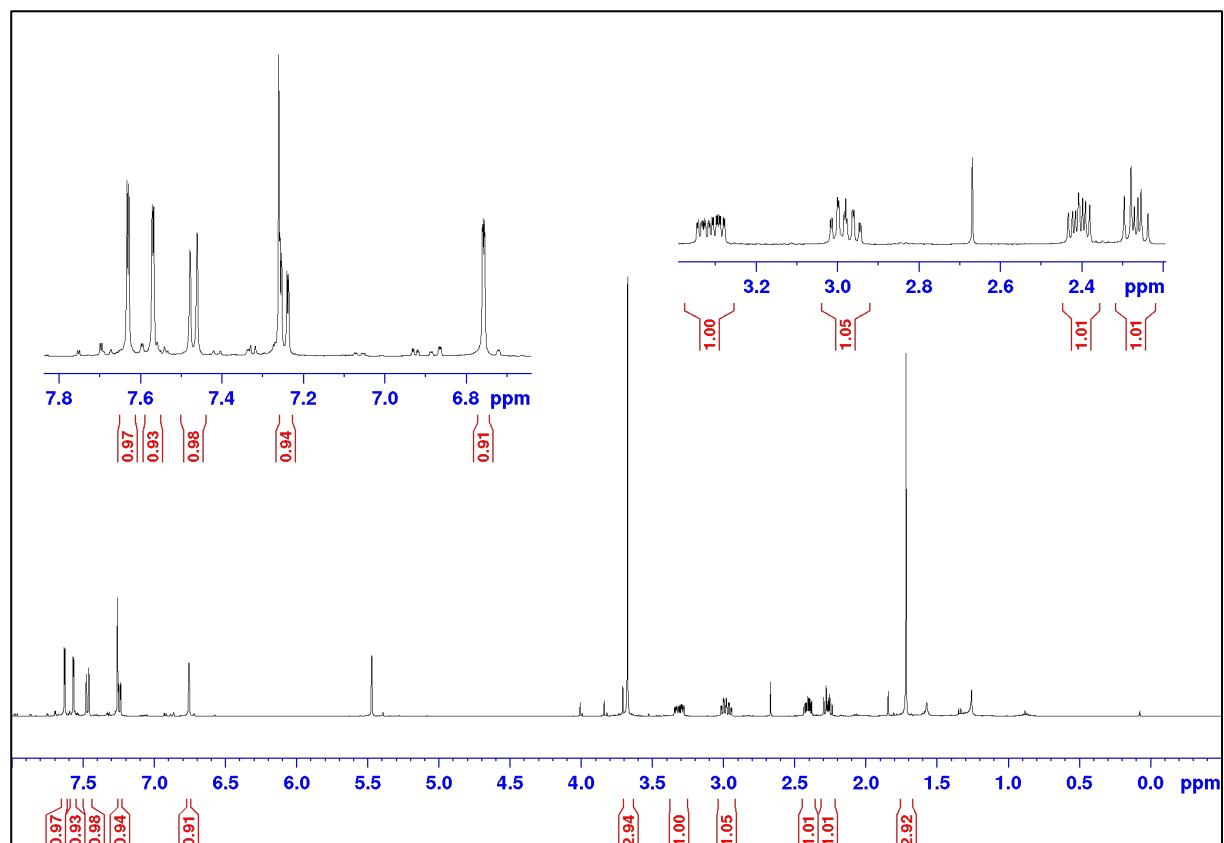

$^{13}\text{C}$  NMR (125 MHz,  $\text{CDCl}_3$ ) of (*E*)-**2e**

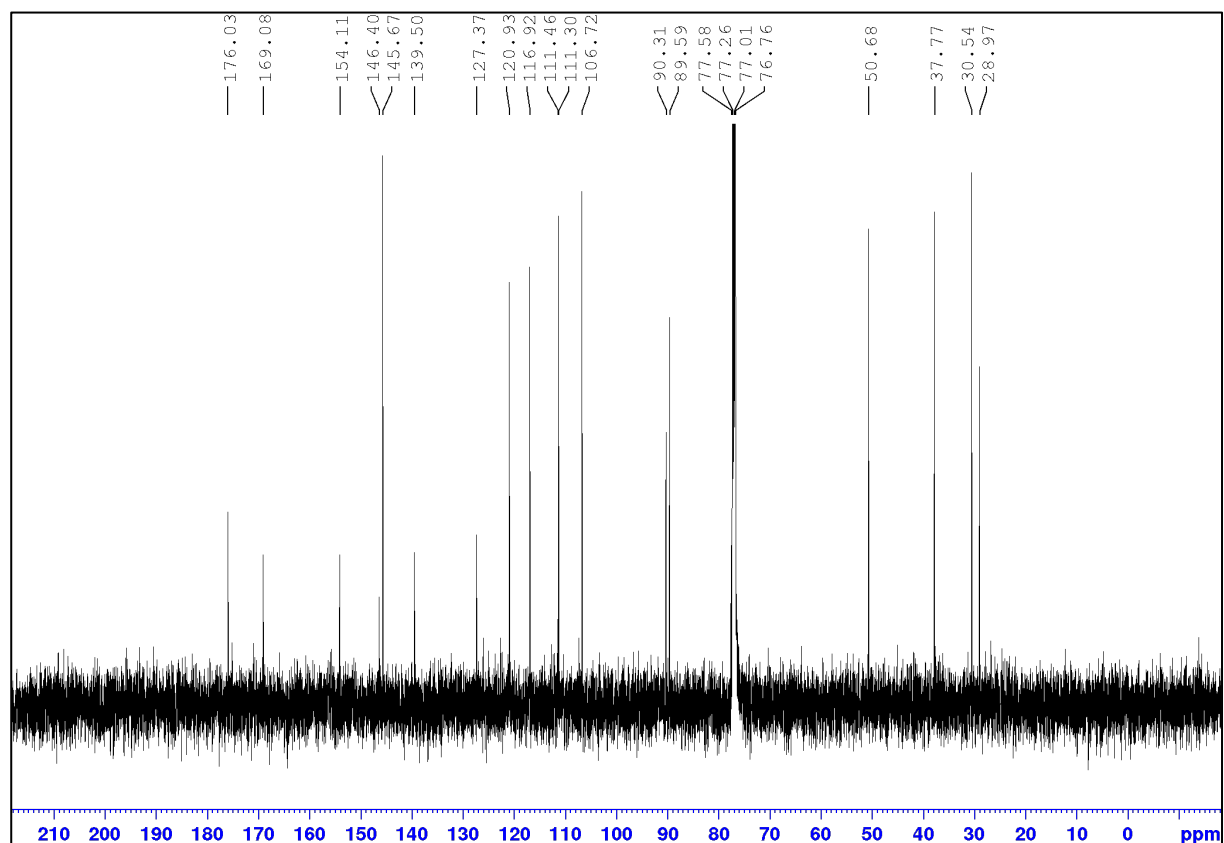

$^1\text{H}$  NMR (500 MHz,  $\text{CDCl}_3$ ) of (*E*)-**2f**

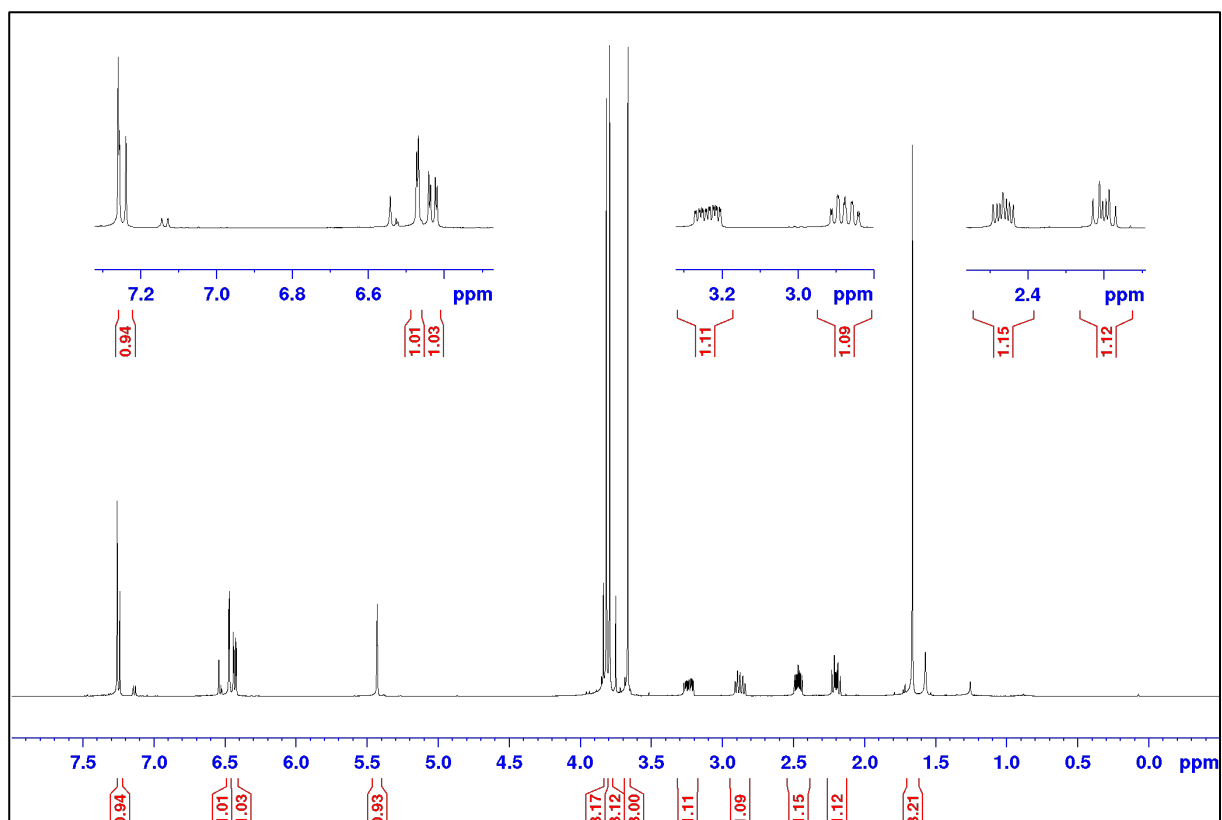

$^{13}\text{C}$  NMR (125 MHz,  $\text{CDCl}_3$ ) of (*E*)-**2f**

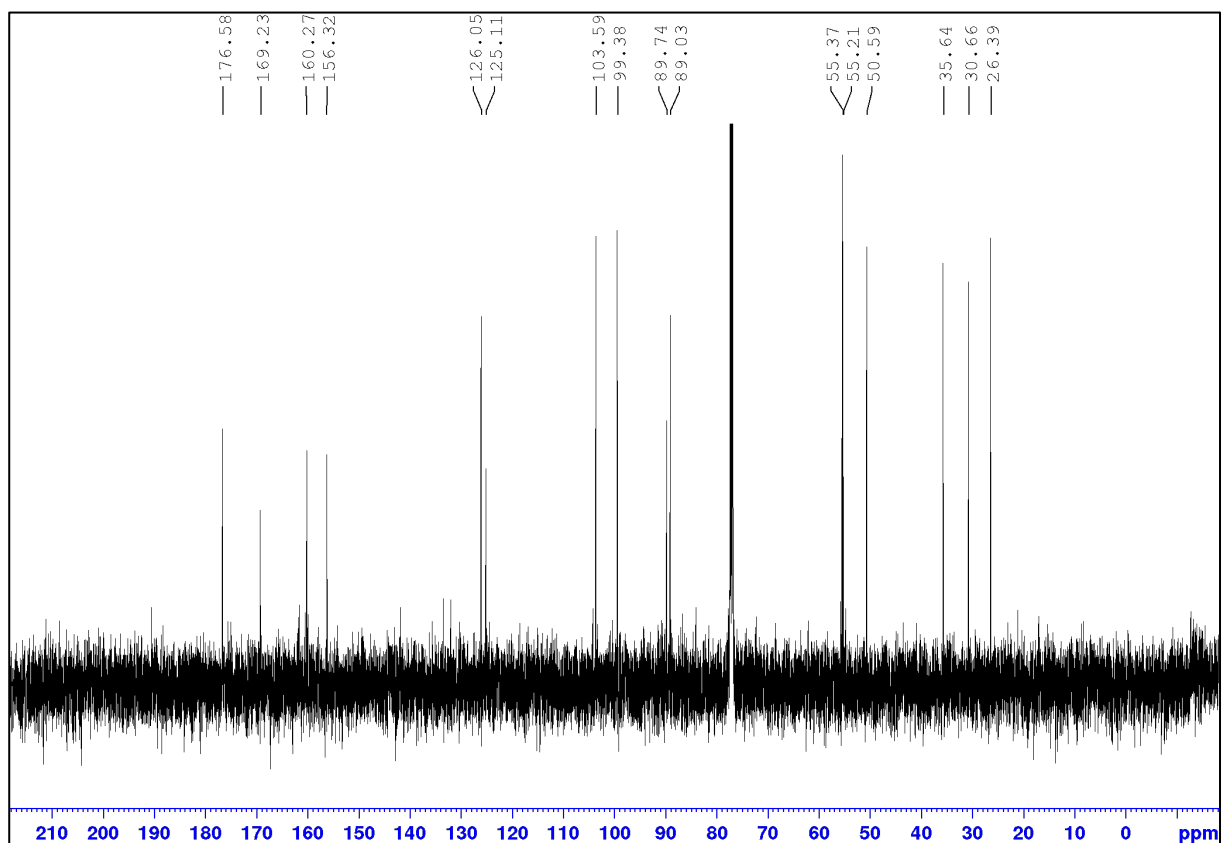

$^1\text{H}$  NMR (500 MHz,  $\text{CDCl}_3$ ) of (*E*)-**2g**

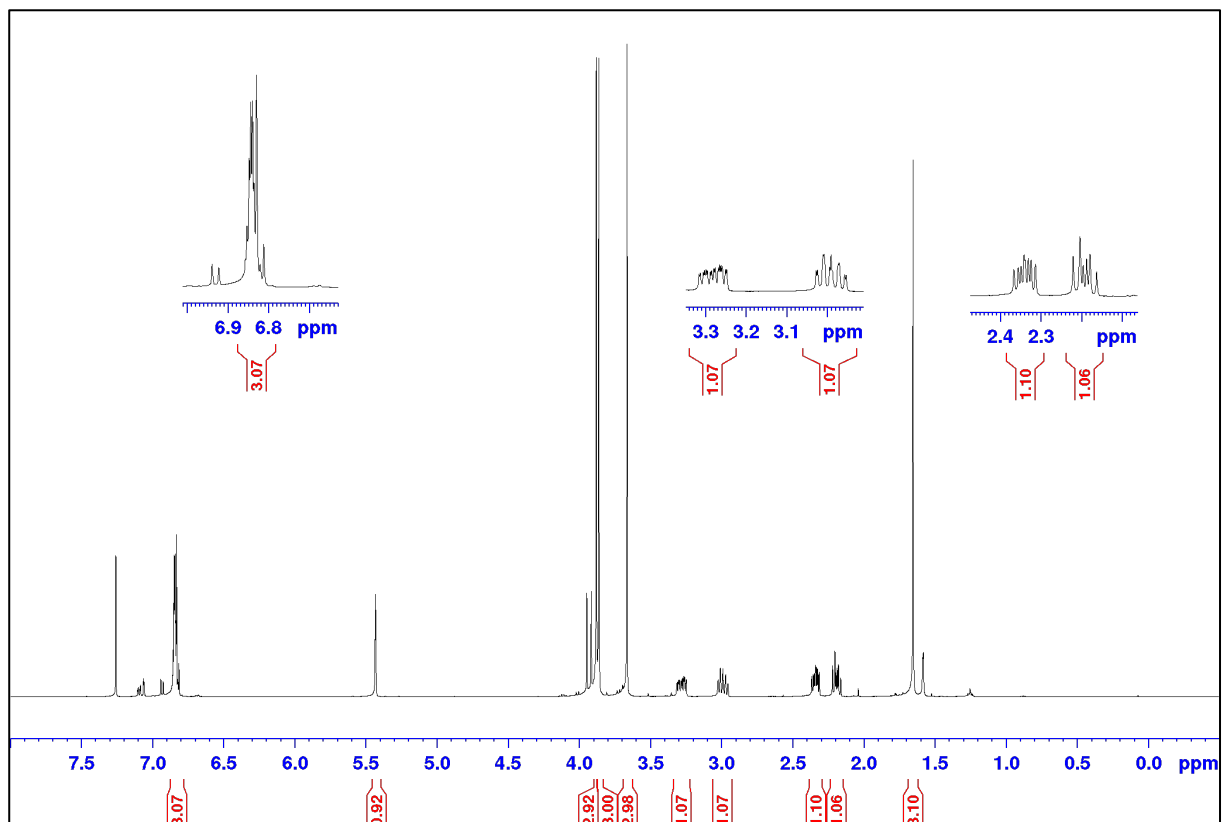

$^{13}\text{C}$  NMR (125 MHz,  $\text{CDCl}_3$ ) of (*E*)-**2g**

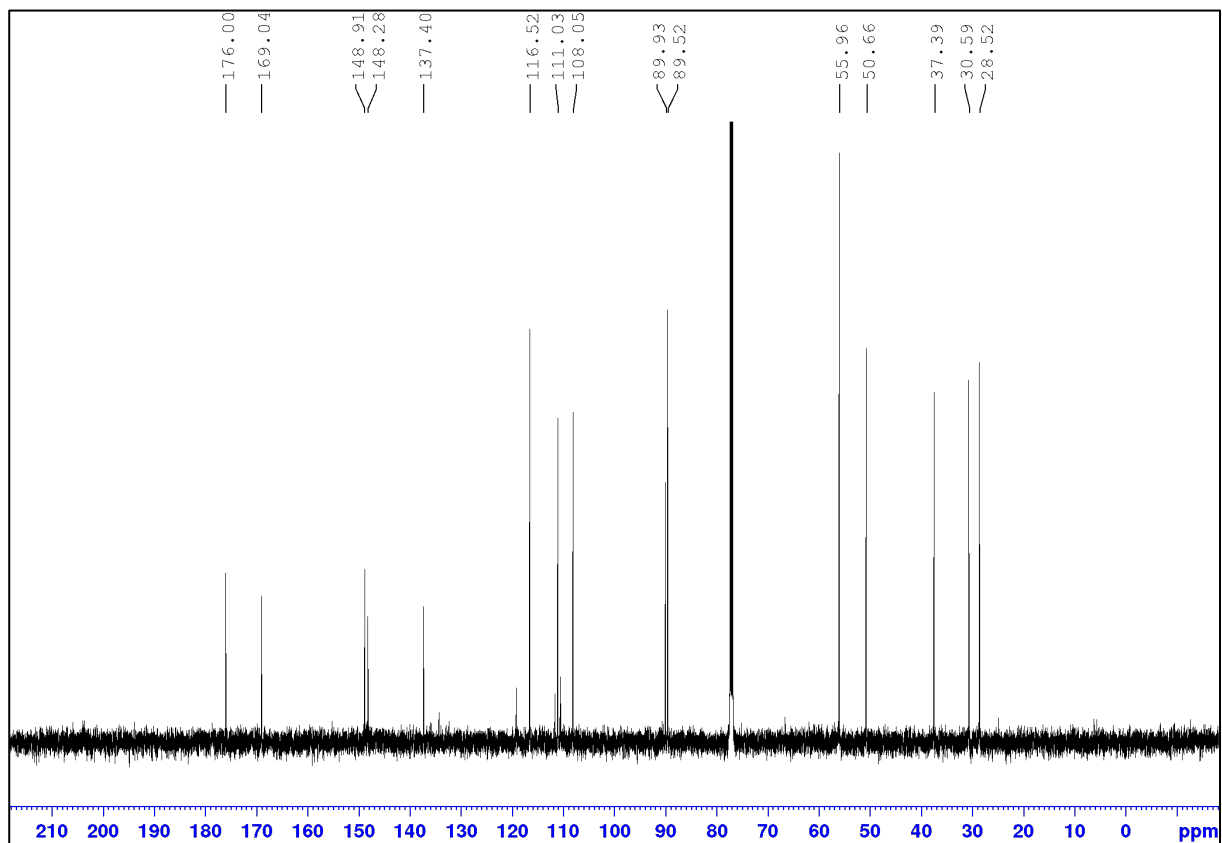

$^1\text{H}$  NMR (500 MHz,  $\text{CDCl}_3$ ) of (*E*)-**2i**

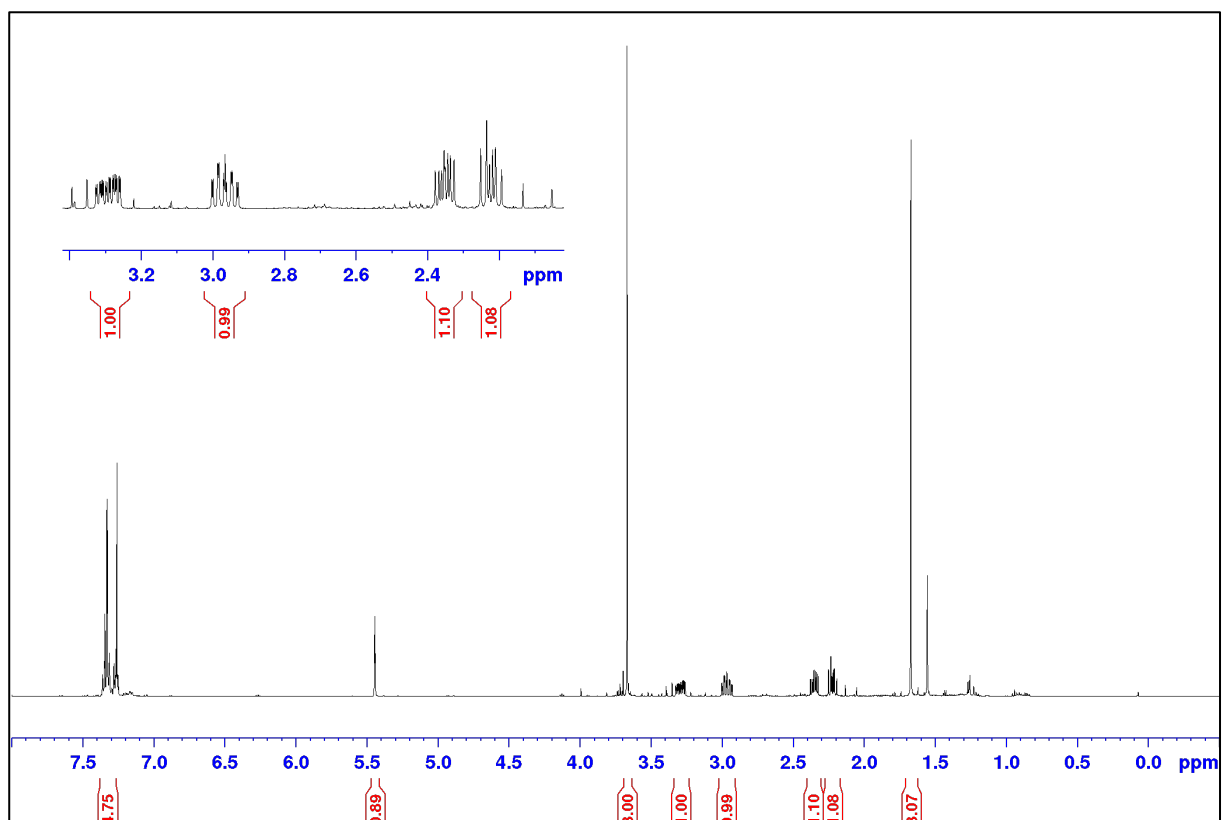

$^{13}\text{C}$  NMR (125 MHz,  $\text{CDCl}_3$ ) of (*E*)-**2i**

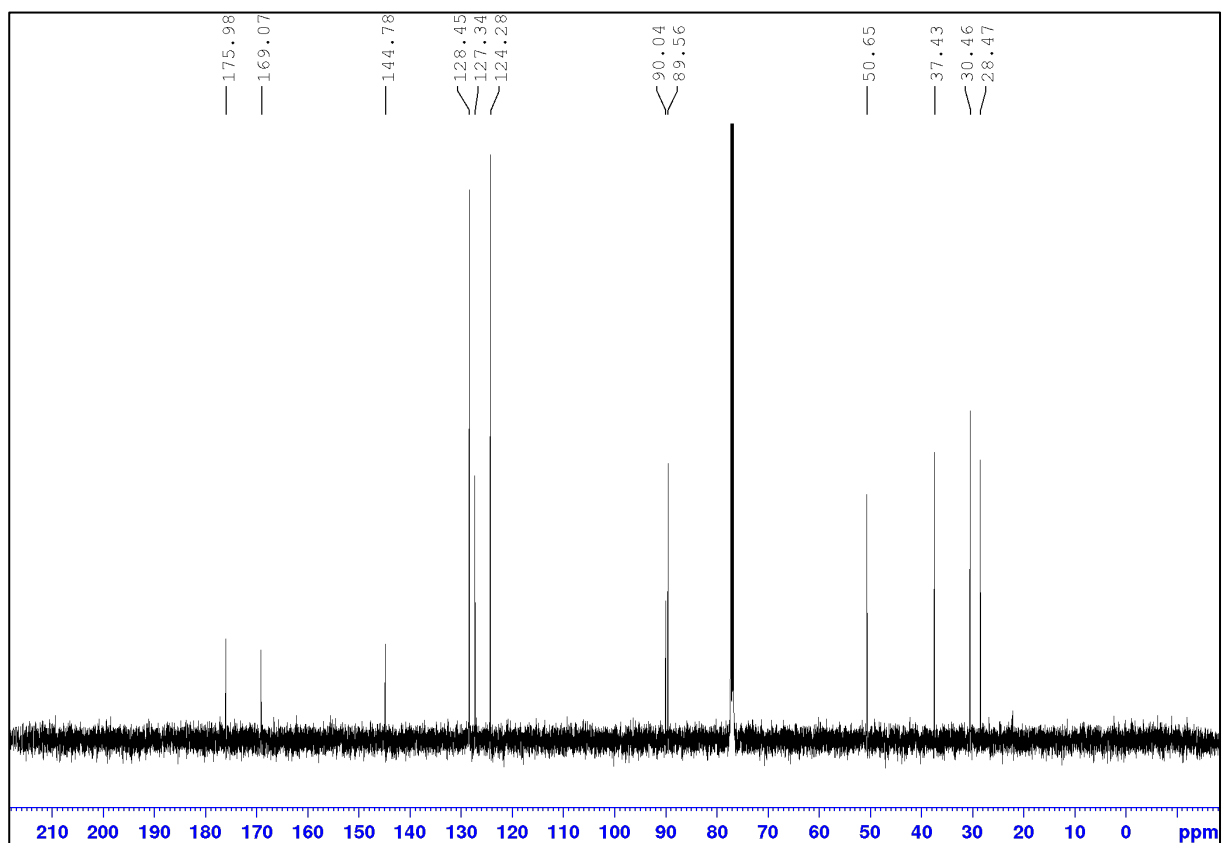

$^1\text{H}$  NMR (500 MHz,  $\text{CDCl}_3$ ) of (*E*)-**2j**

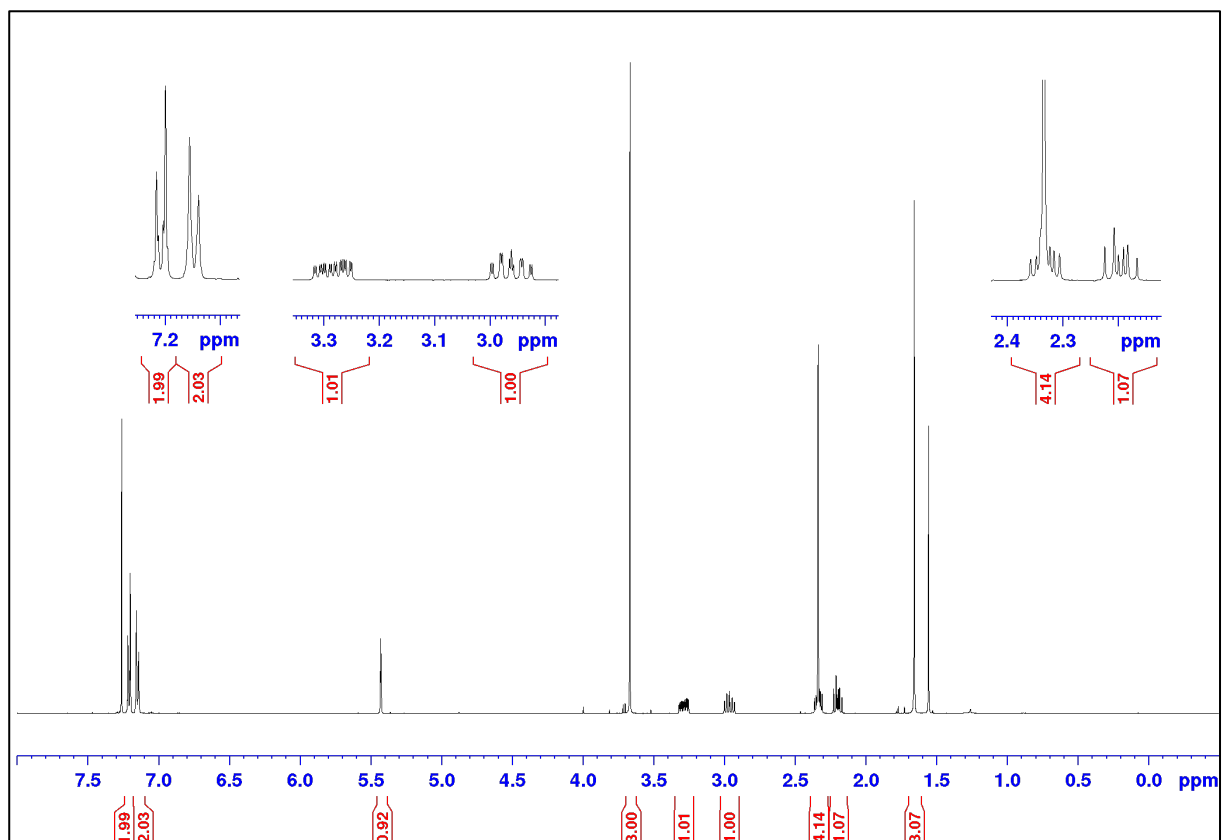

$^{13}\text{C}$  NMR (125 MHz,  $\text{CDCl}_3$ ) of (*E*)-**2j**

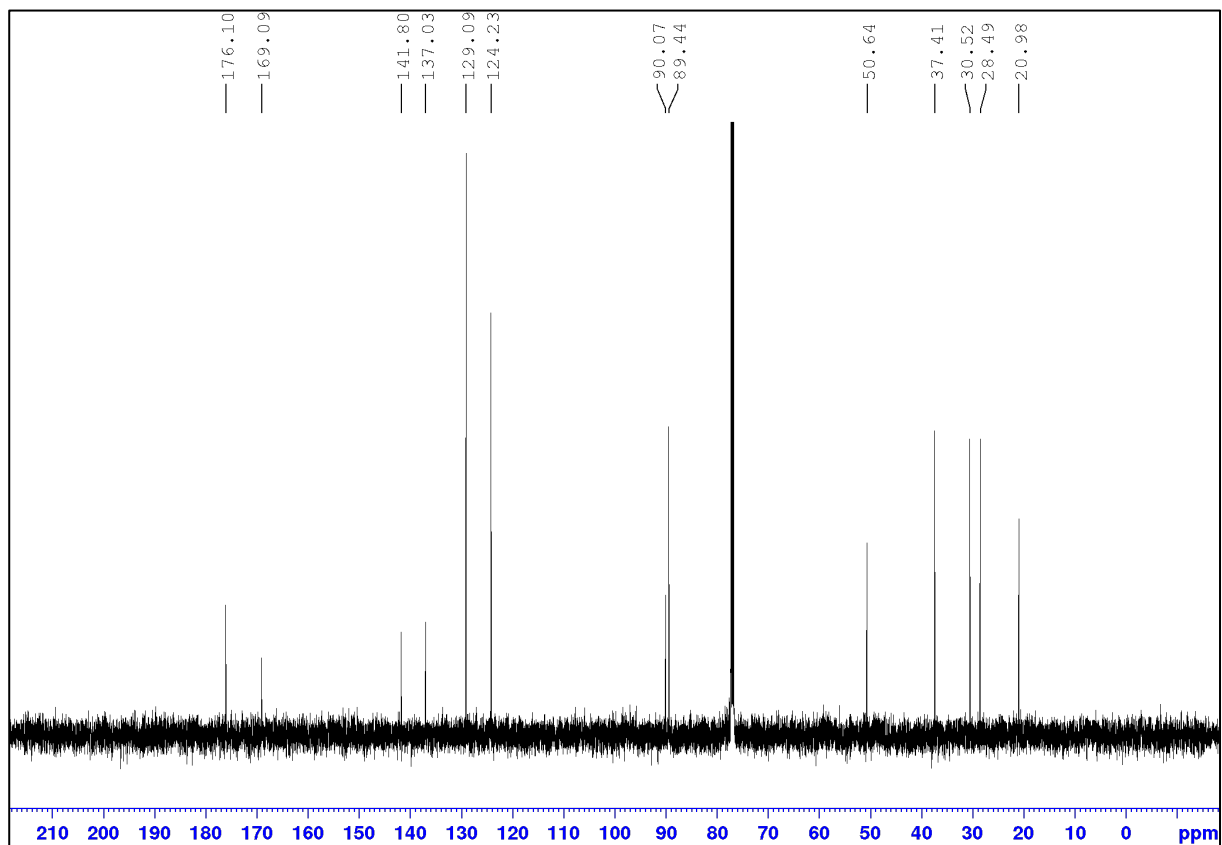

$^1\text{H}$  NMR (500 MHz,  $\text{CDCl}_3$ ) of (*E*)-**2k**

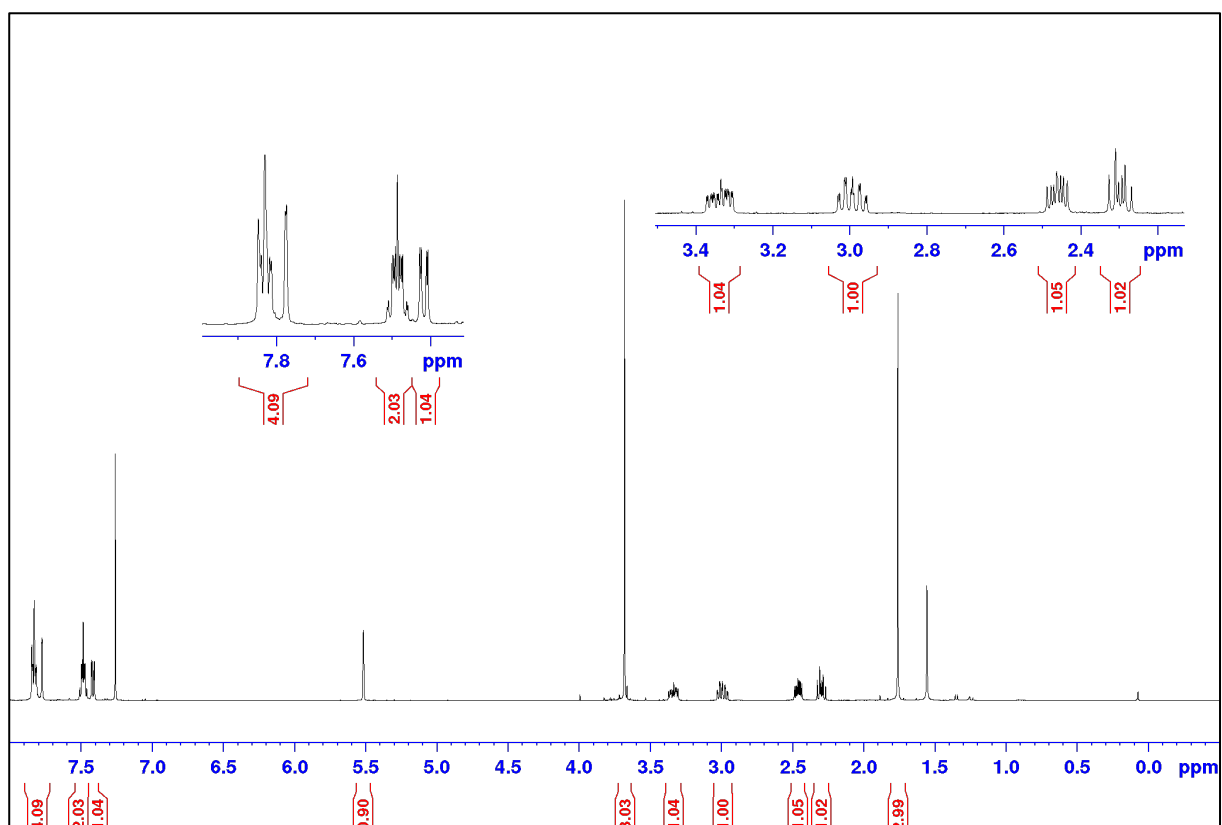

$^{13}\text{C}$  NMR (125 MHz,  $\text{CDCl}_3$ ) of (*E*)-**2k**

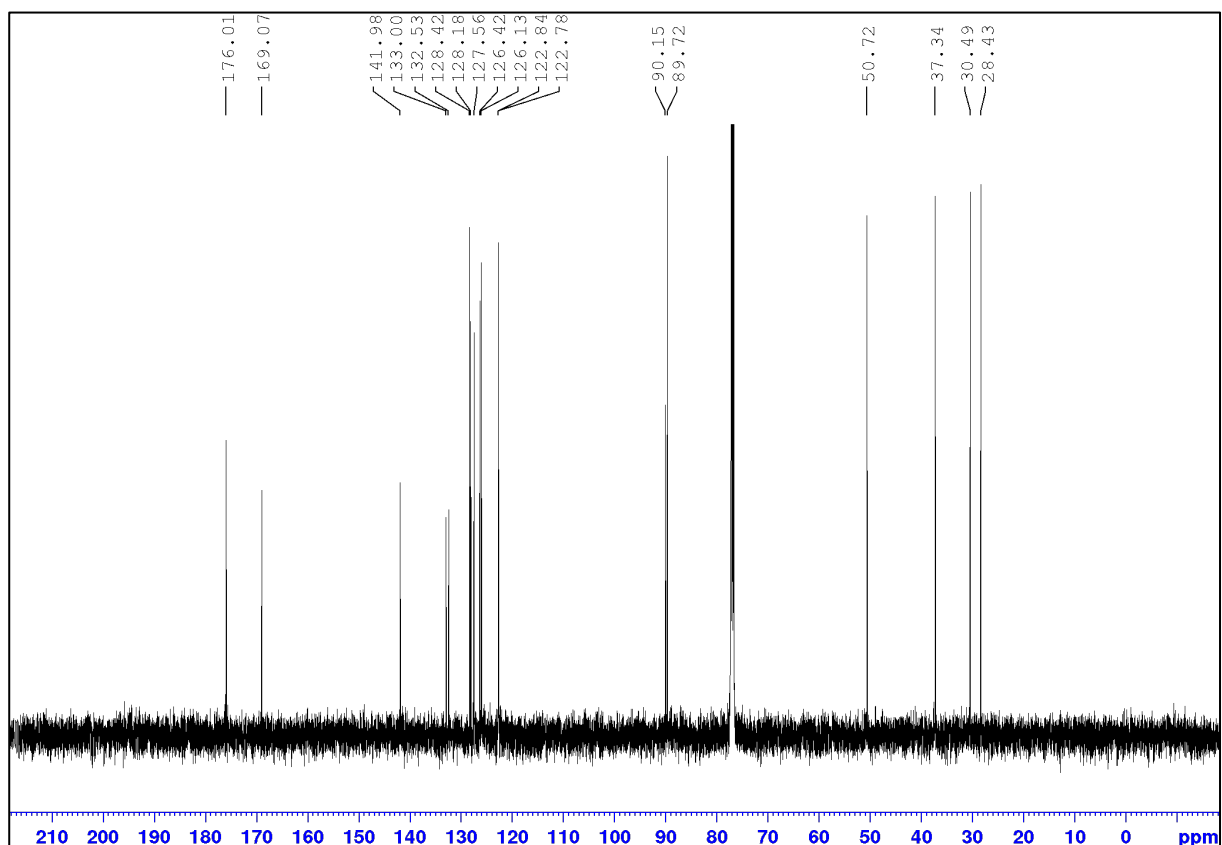

$^1\text{H}$  NMR (500 MHz,  $\text{CDCl}_3$ ) of (*E*)-**21**

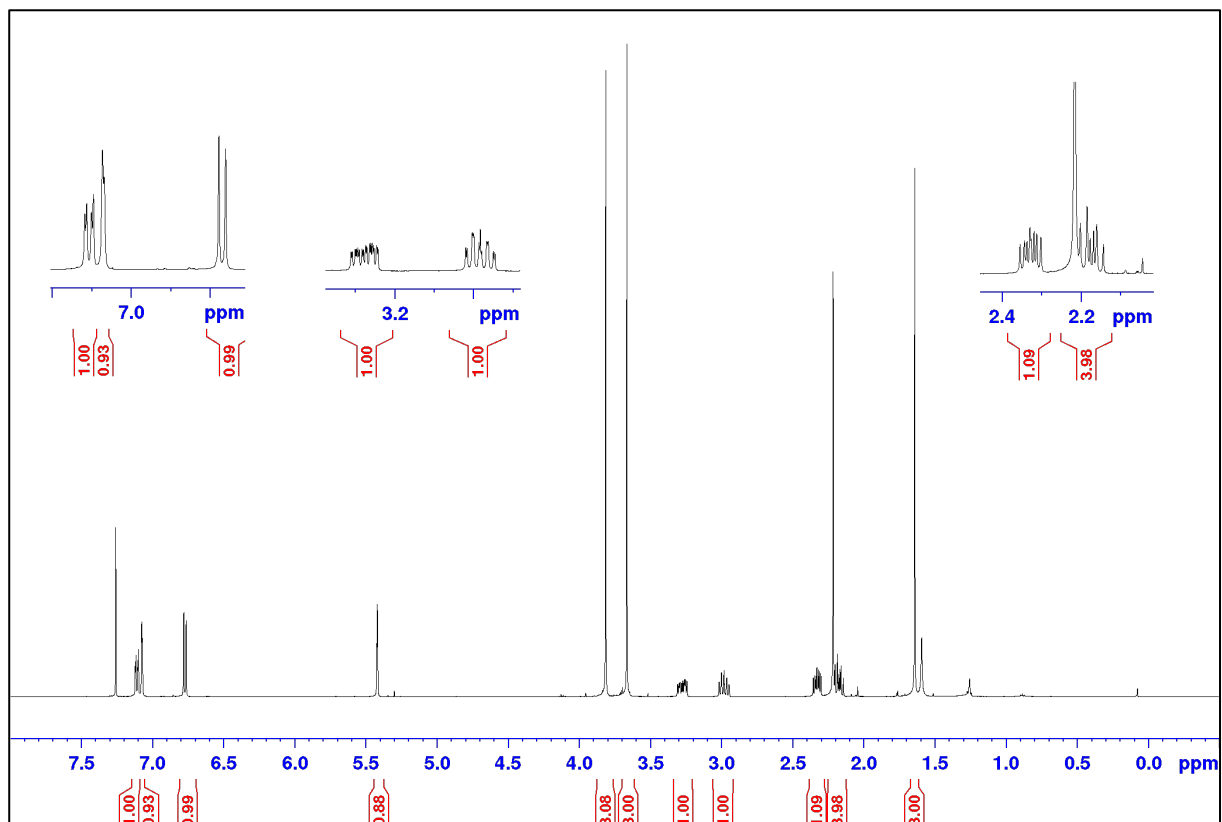

$^{13}\text{C}$  NMR (125 MHz,  $\text{CDCl}_3$ ) of (*E*)-**21**

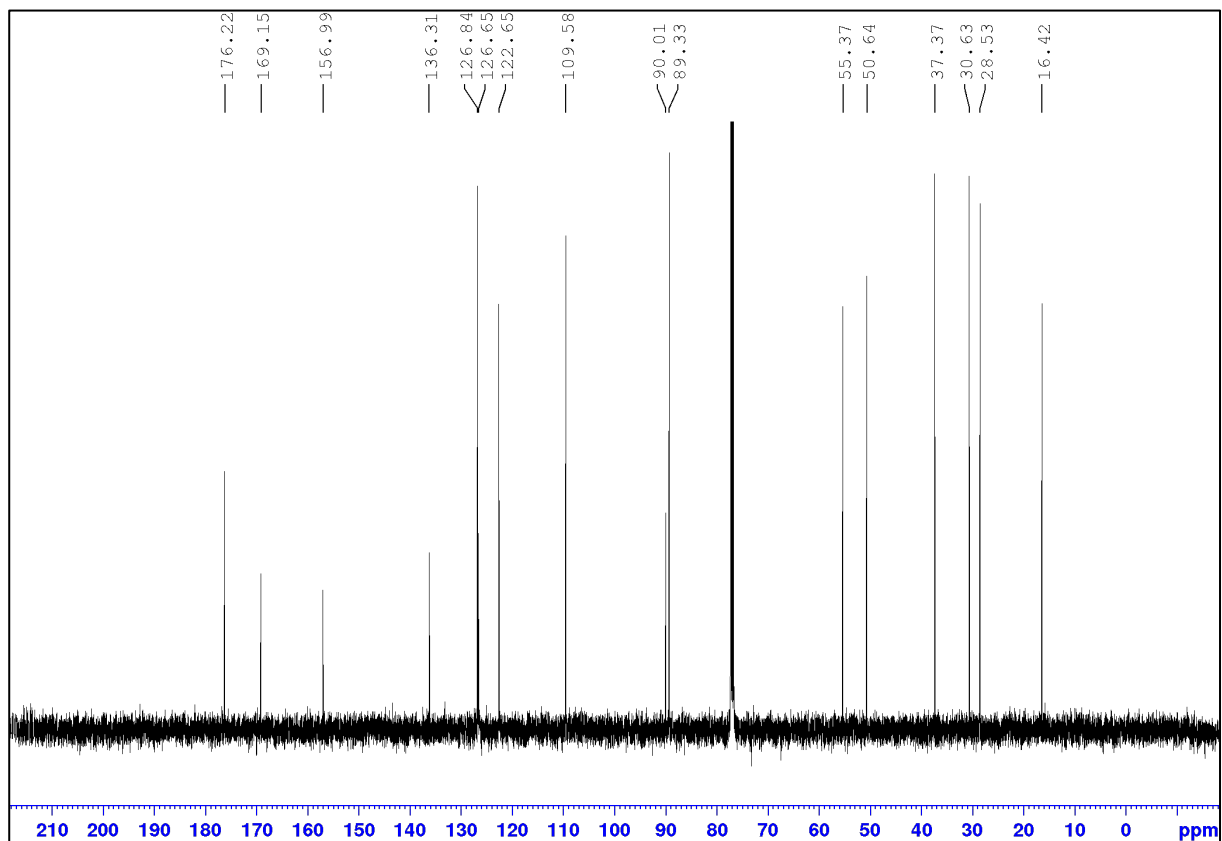



$^1\text{H}$  NMR (500 MHz,  $\text{CDCl}_3$ ) of (*E*)-**2m**

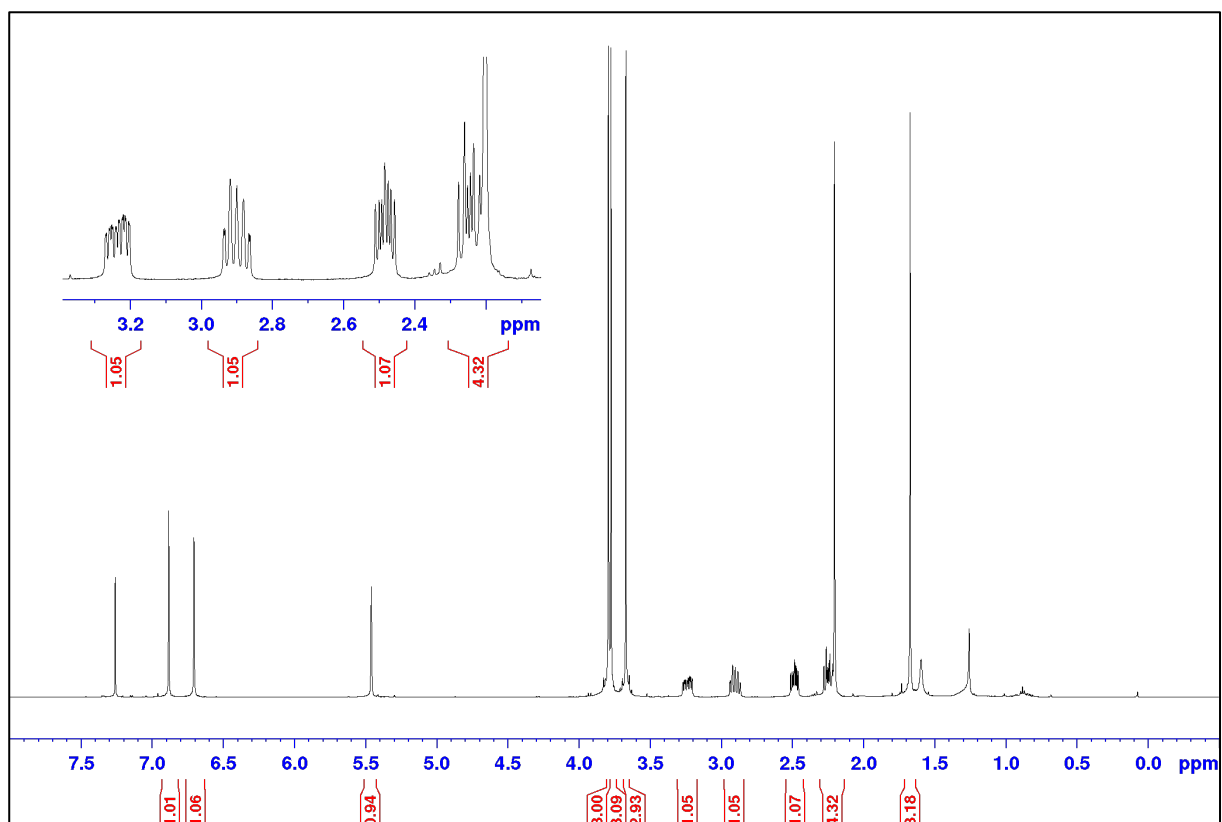

$^{13}\text{C}$  NMR (125 MHz,  $\text{CDCl}_3$ ) of (*E*)-**2m**

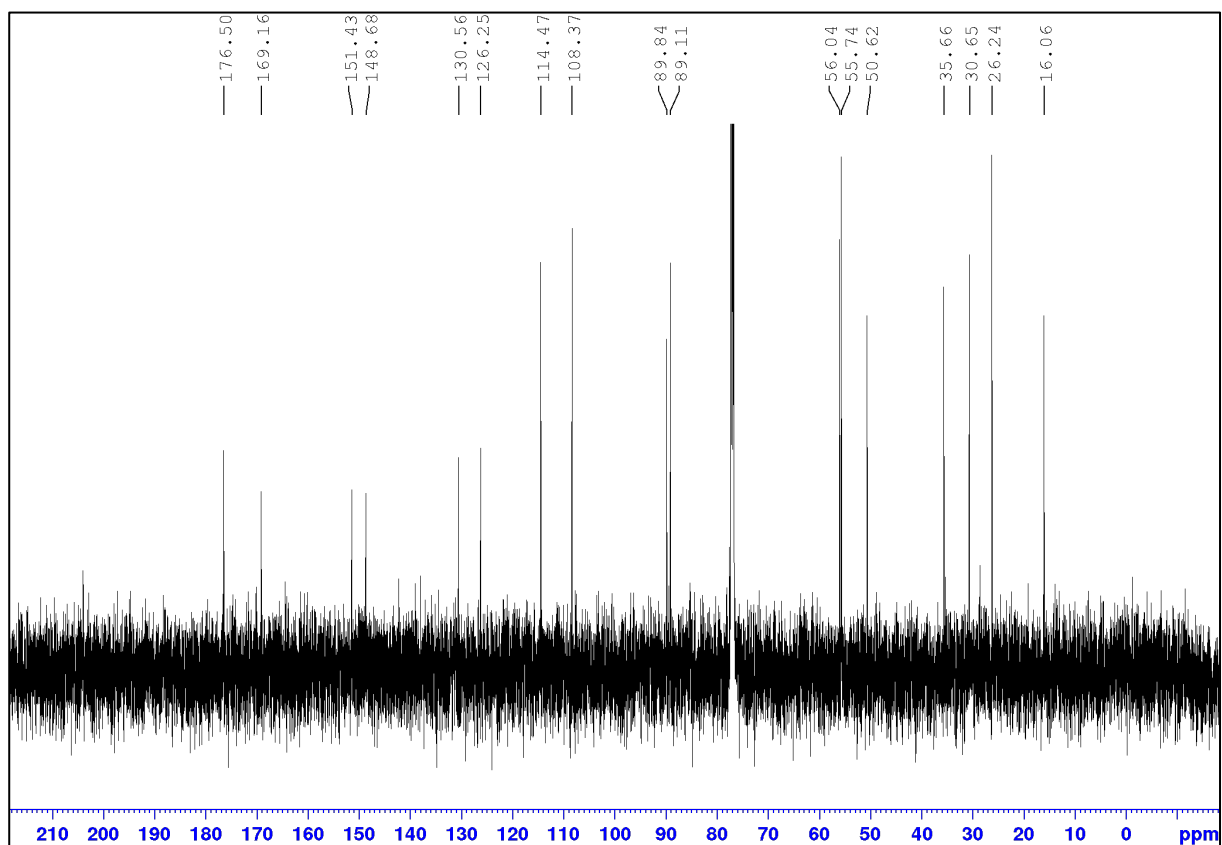

<sup>1</sup>H NMR (500 MHz, CDCl<sub>3</sub>) of (*E*)-**2n**

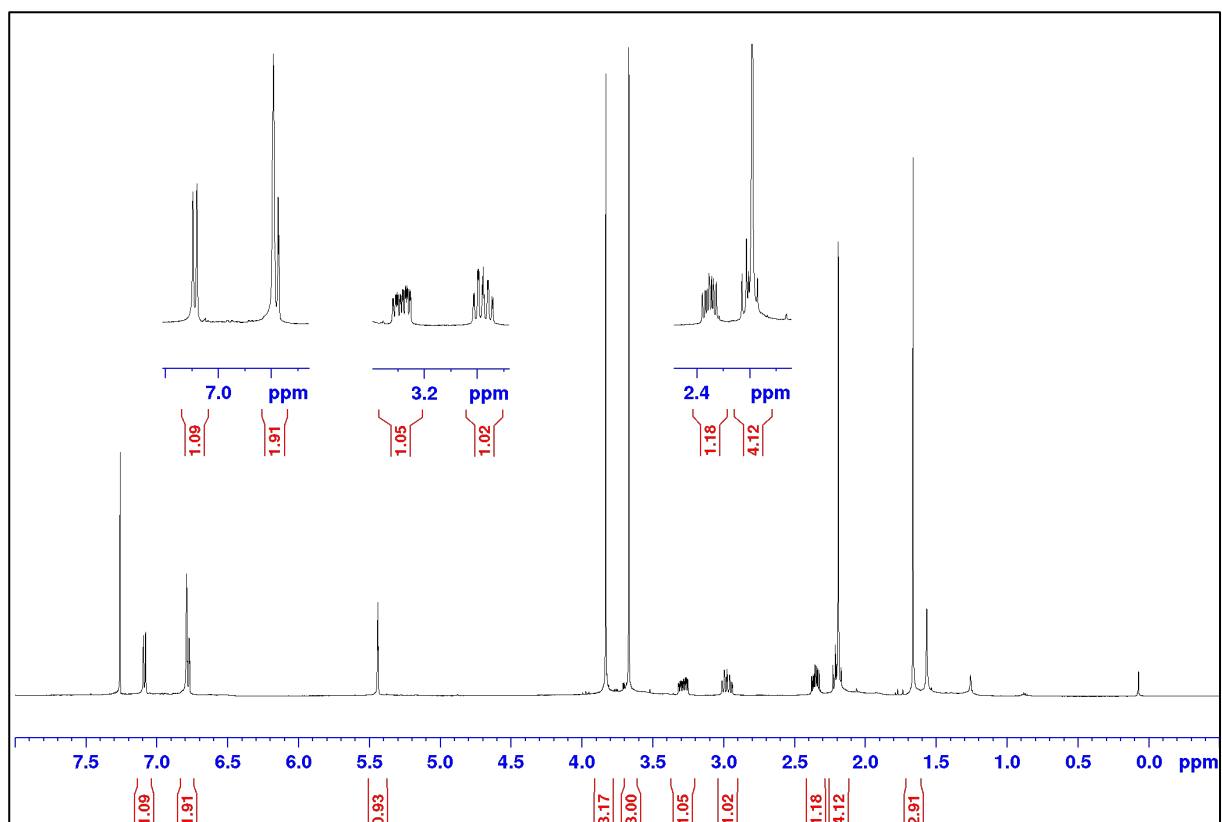

<sup>13</sup>C NMR (125 MHz, CDCl<sub>3</sub>) of (*E*)-**2n**

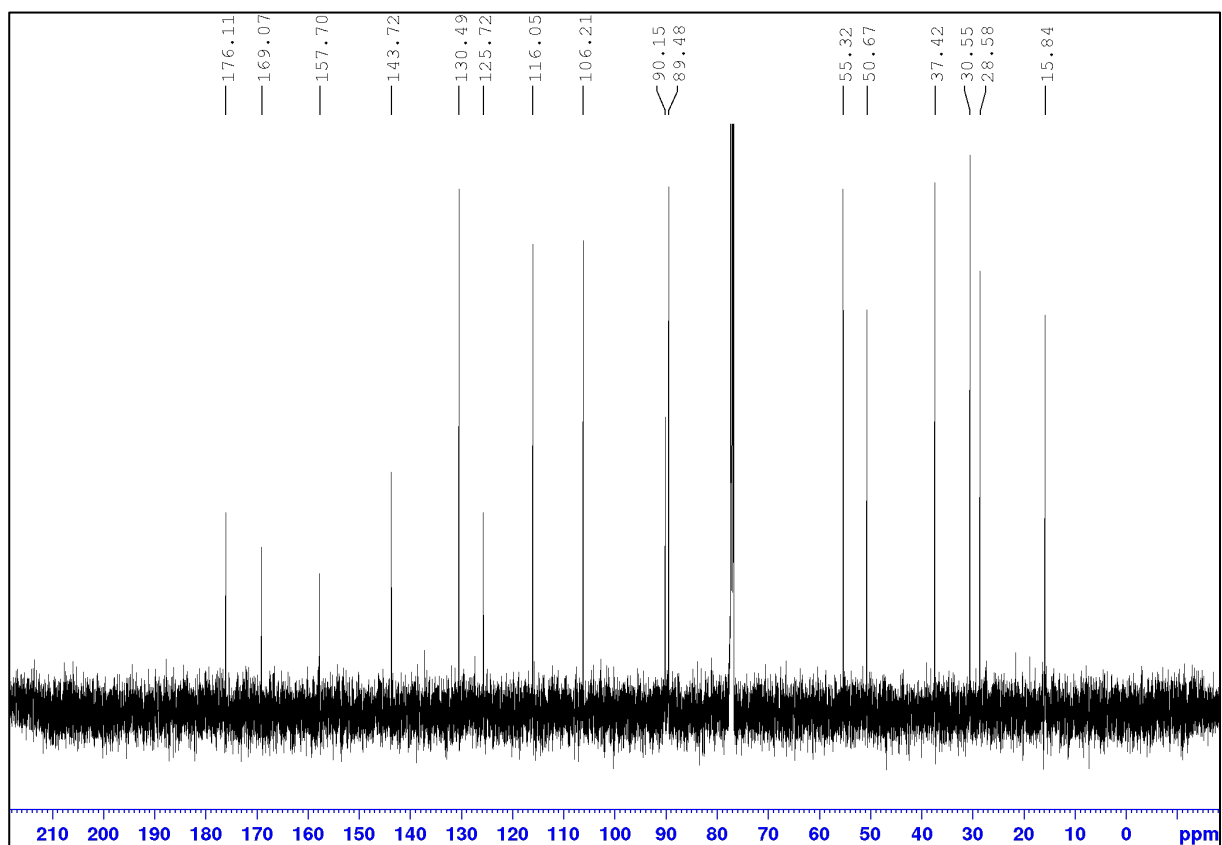

$^1\text{H}$  NMR (500 MHz,  $\text{CDCl}_3$ ) of **3a**

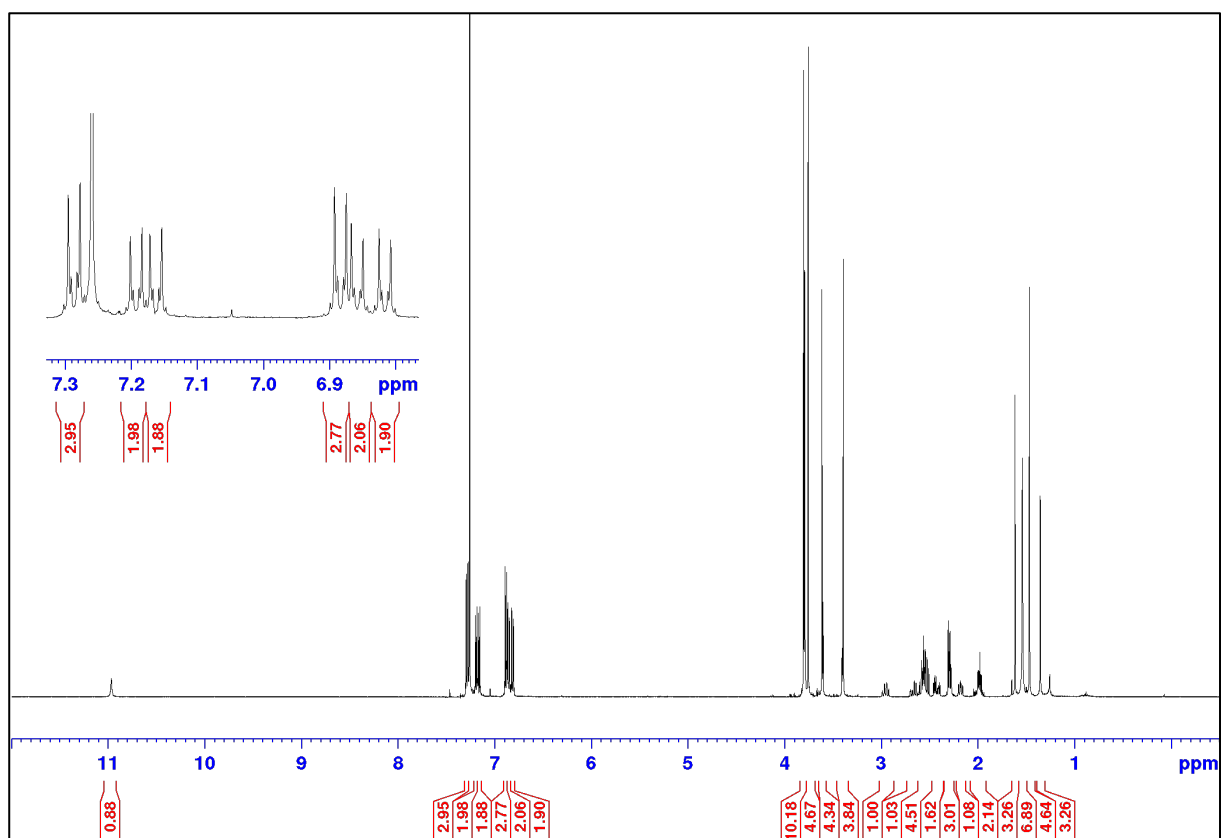

$^1\text{H}$  NMR (500 MHz,  $\text{CDCl}_3$ ) of **3d**

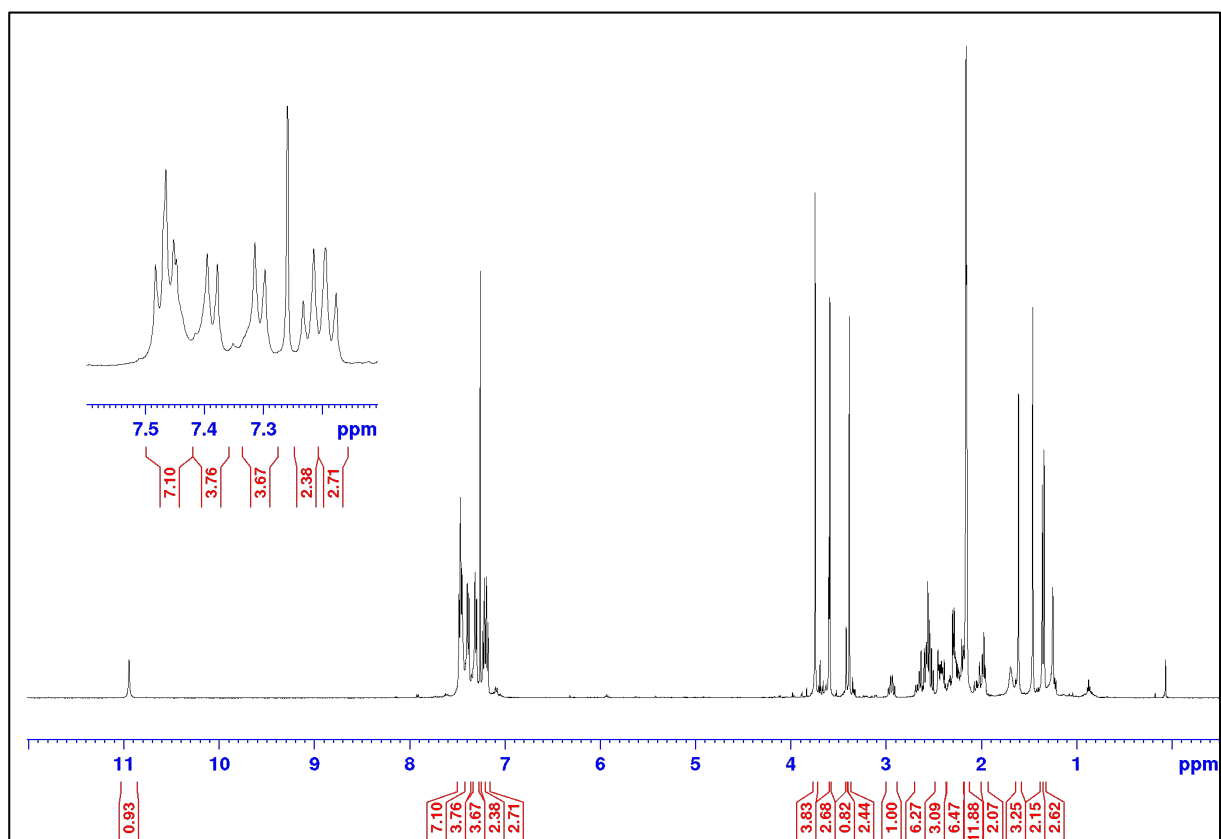

$^1\text{H}$  NMR (500 MHz,  $\text{CDCl}_3$ ) of **3e**

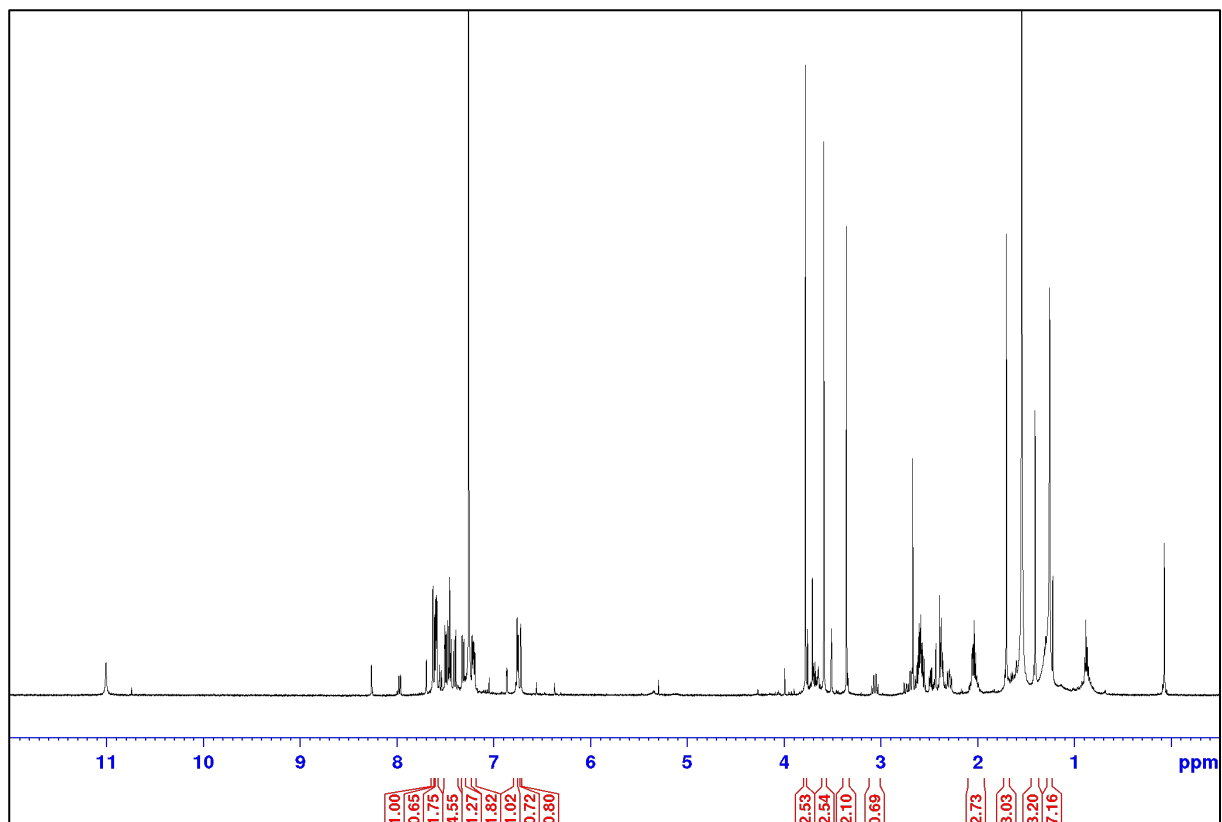

$^1\text{H}$  NMR (500 MHz,  $\text{CDCl}_3$ ) of **3f**

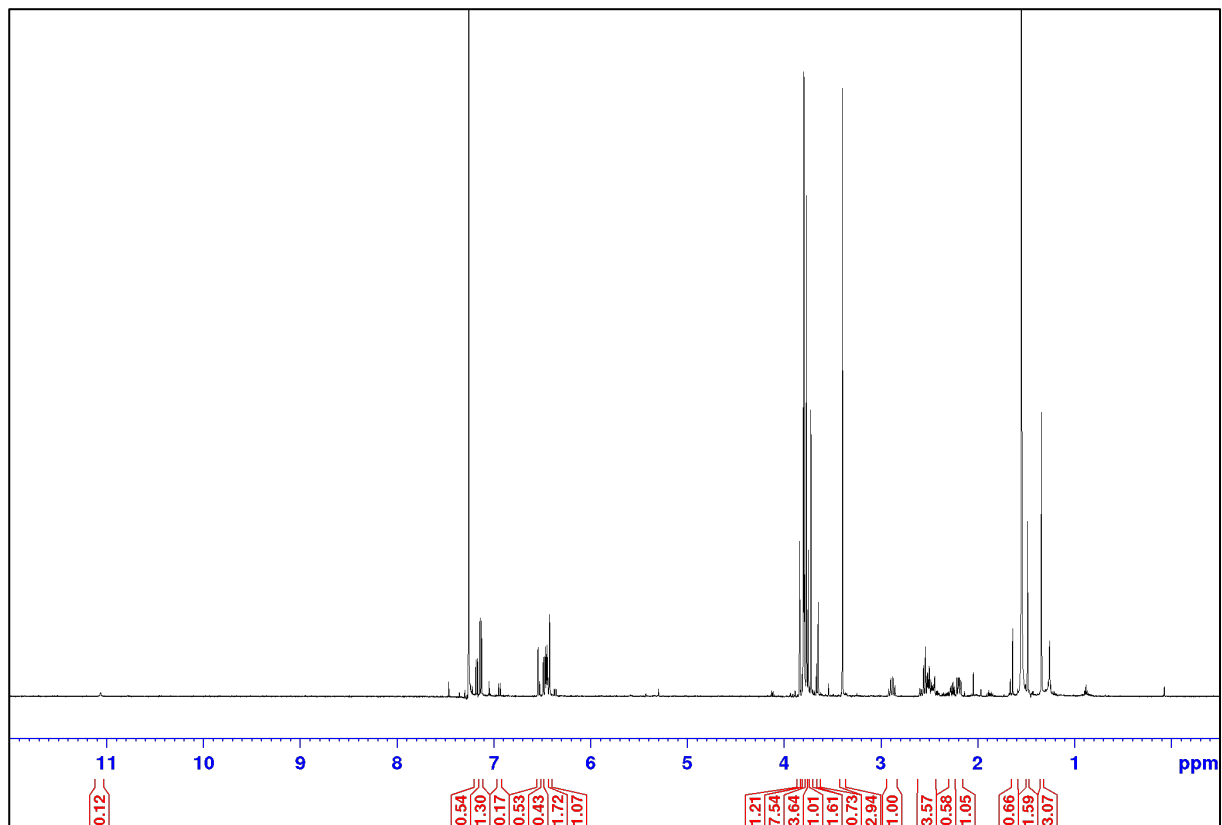

$^1\text{H}$  NMR (500 MHz,  $\text{CDCl}_3$ ) of **3g**

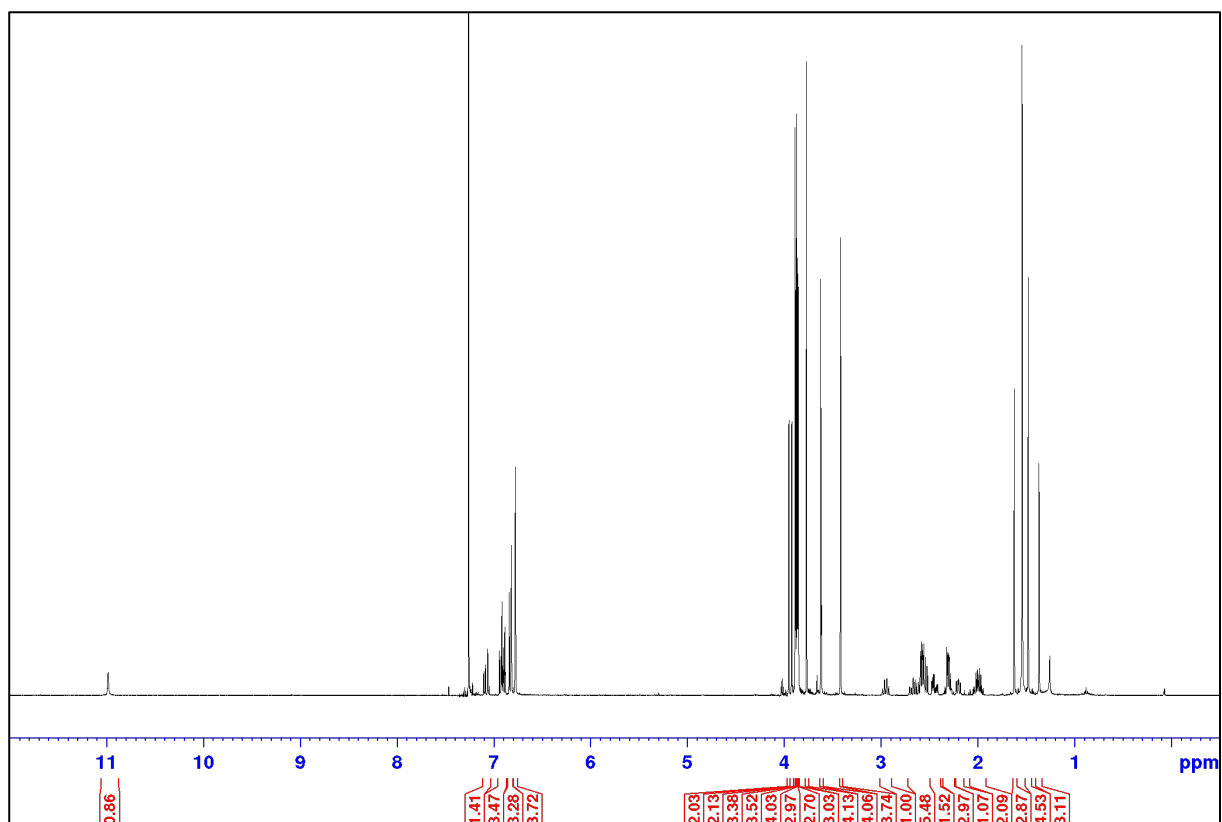

$^1\text{H}$  NMR (500 MHz,  $\text{CDCl}_3$ ) of **3i**

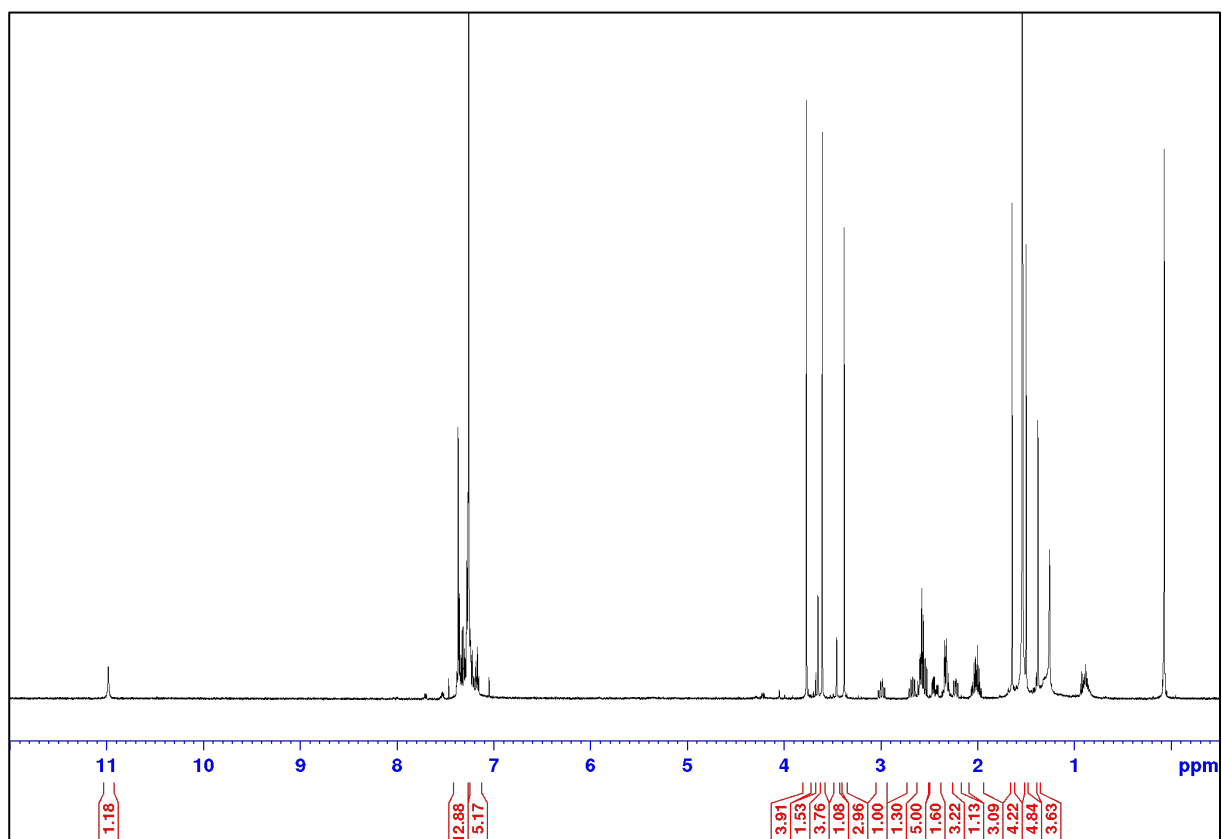

$^1\text{H}$  NMR (500 MHz,  $\text{CDCl}_3$ ) of **3j**

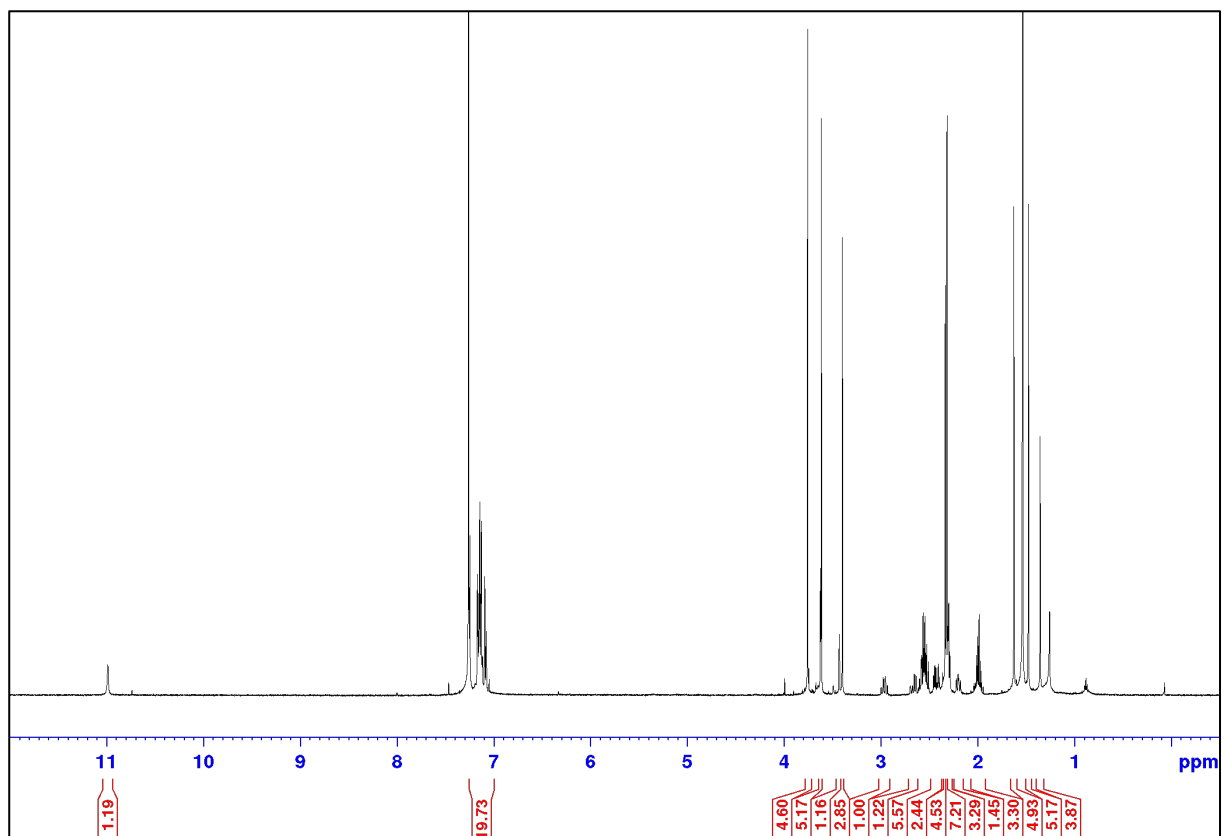

$^1\text{H}$  NMR (500 MHz,  $\text{CDCl}_3$ ) of **3k**

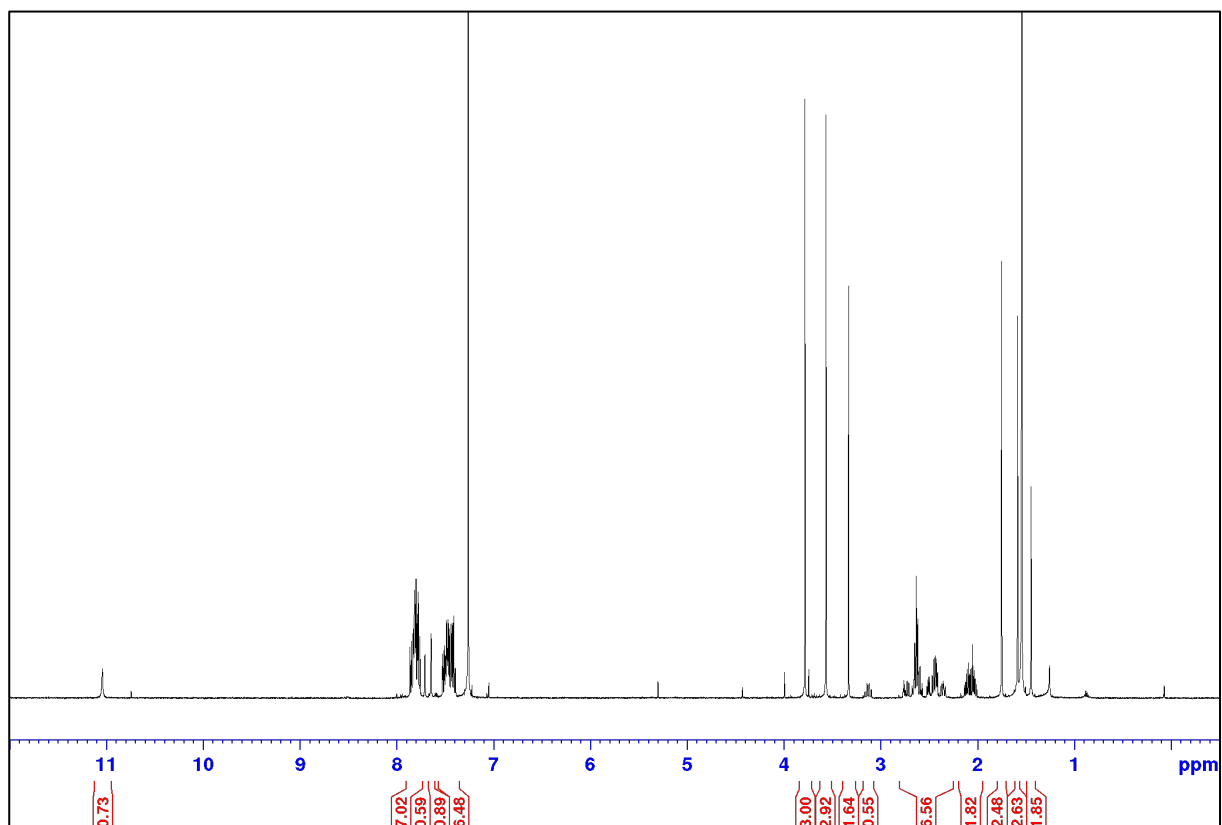

$^1\text{H}$  NMR (500 MHz,  $\text{CDCl}_3$ ) of **3l**

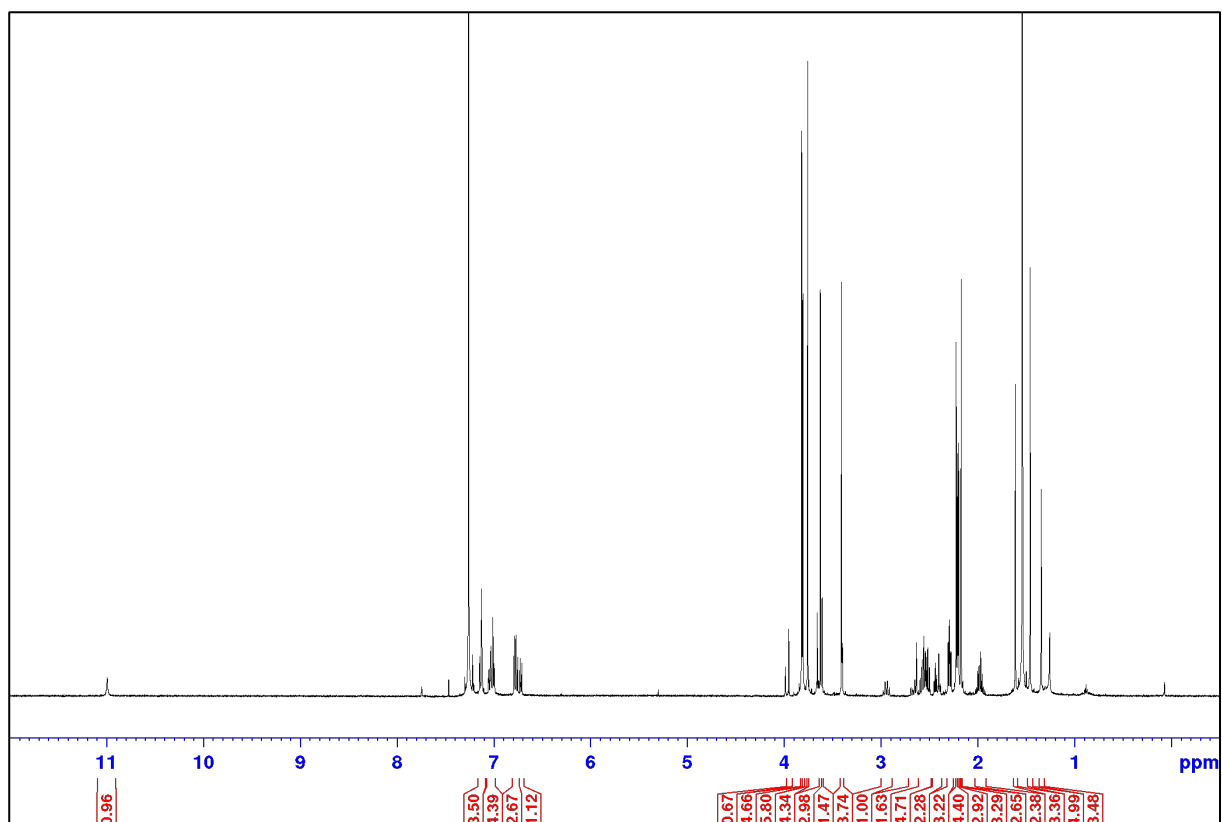

$^1\text{H}$  NMR (500 MHz,  $\text{CDCl}_3$ ) of **3m**

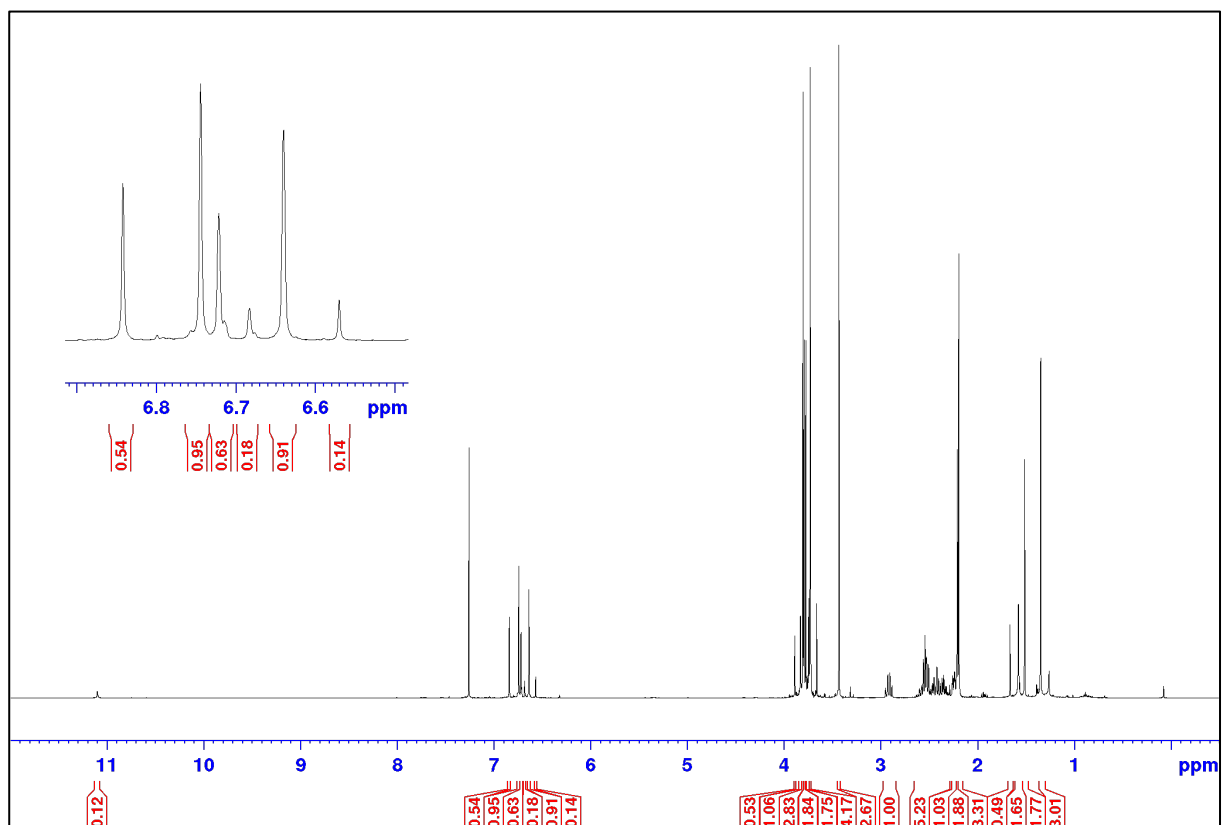

$^1\text{H}$  NMR (500 MHz,  $\text{CDCl}_3$ ) of **3n**

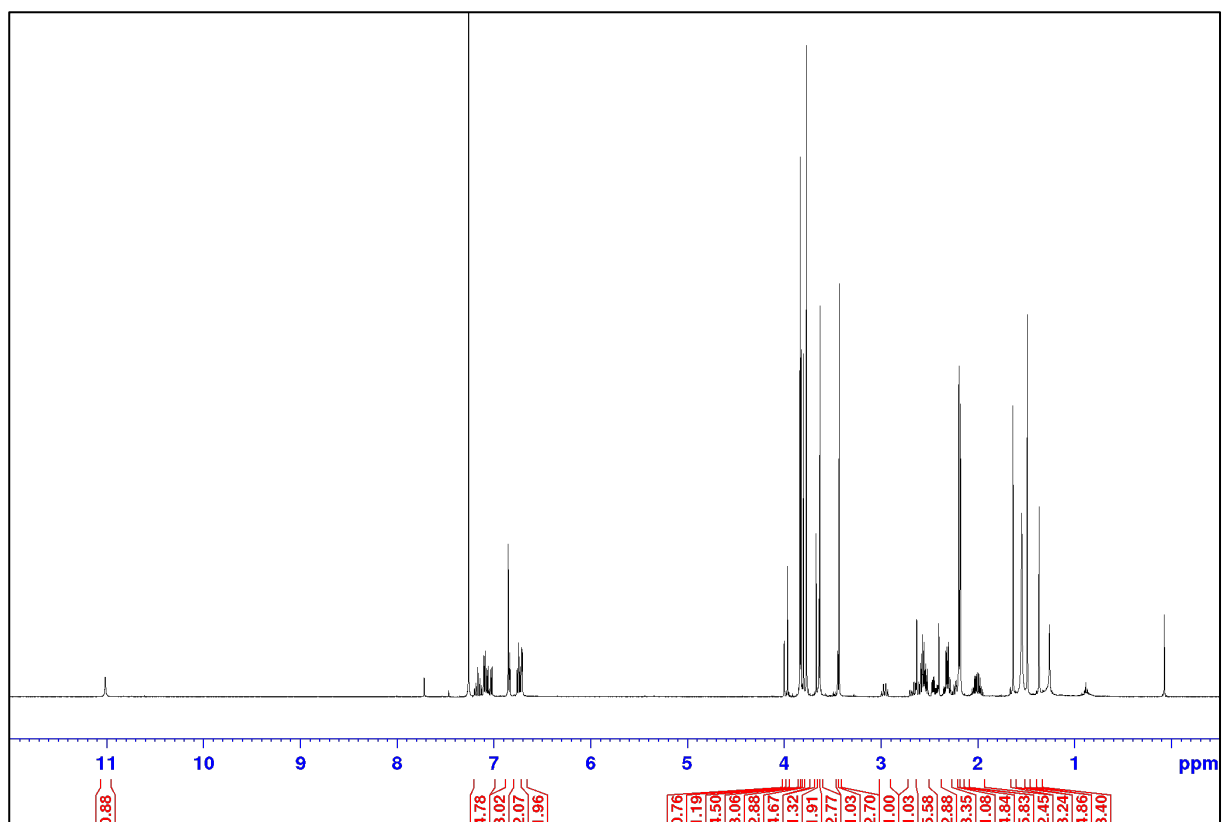

$^1\text{H}$  NMR (500 MHz,  $\text{CDCl}_3$ ) of **10a**

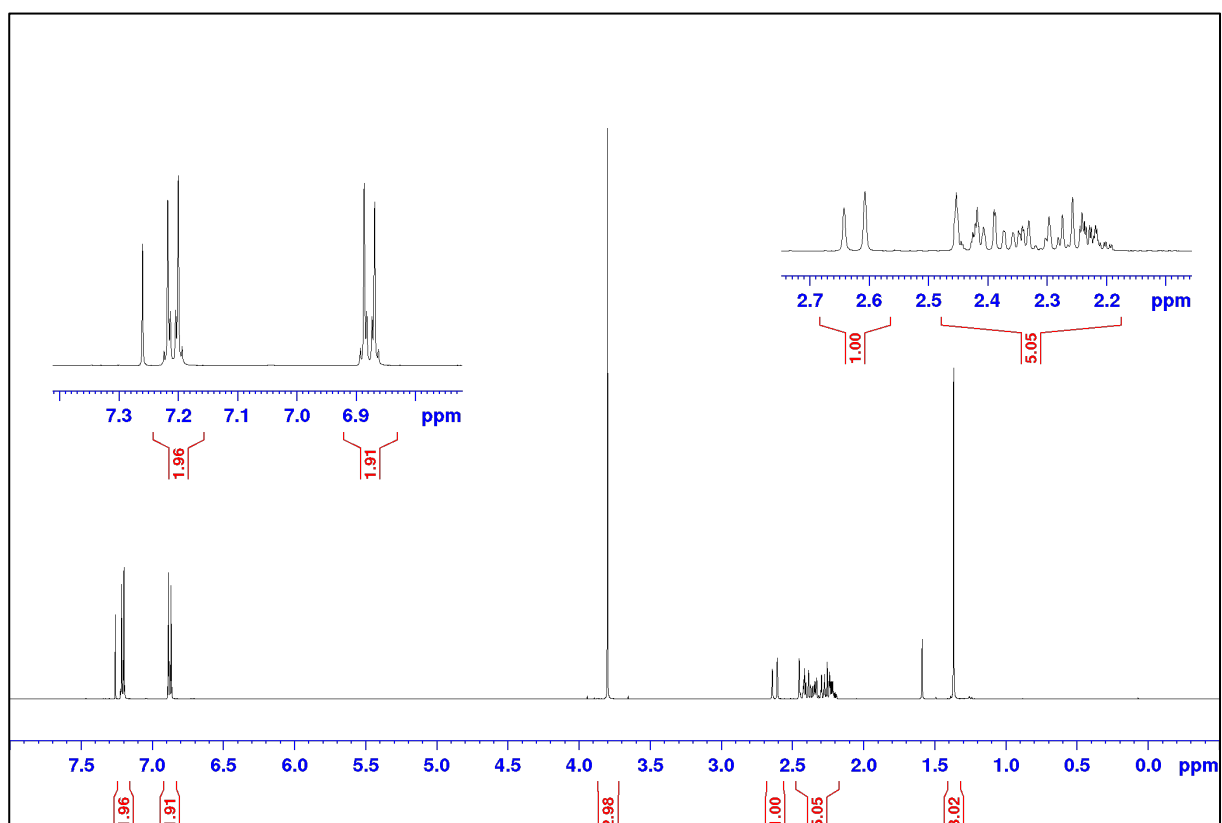



$^1\text{H}$  NMR (500 MHz,  $\text{CDCl}_3$ ) of **10d**

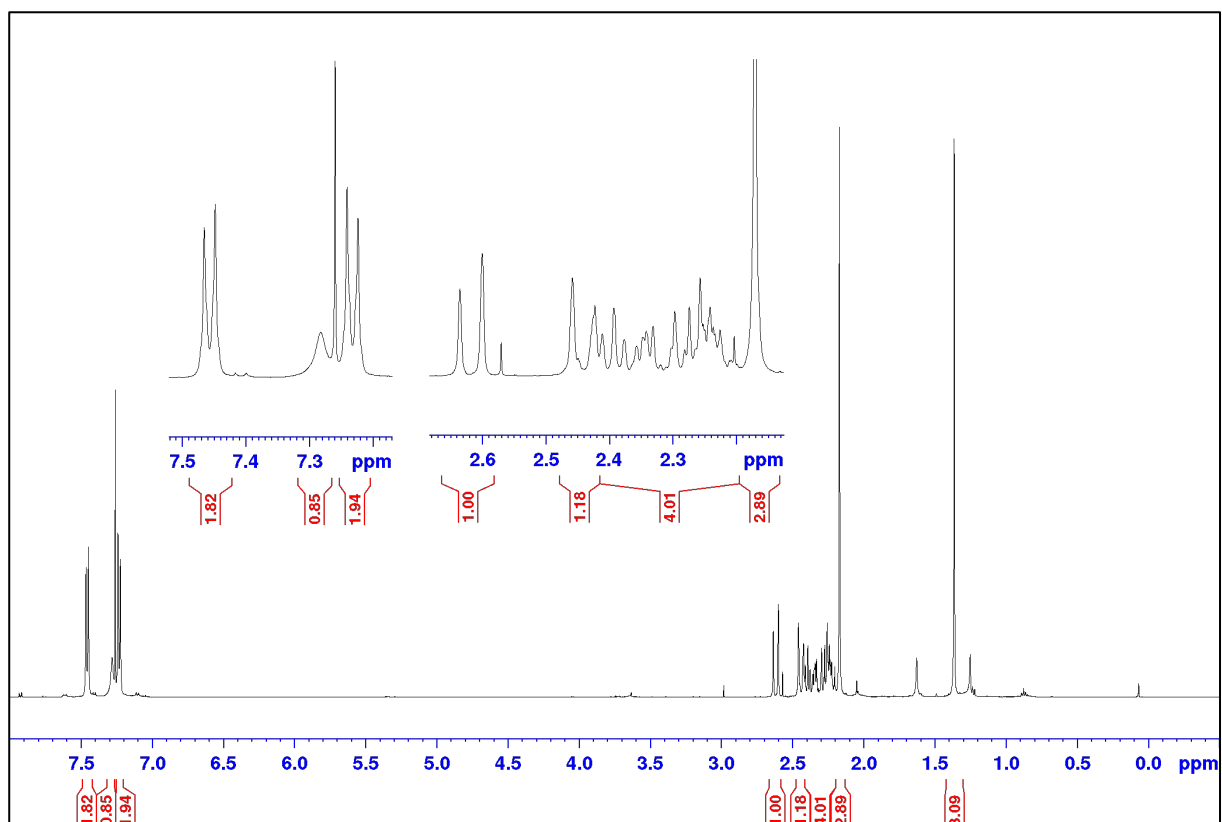

$^{13}\text{C}$  NMR (125 MHz,  $\text{CDCl}_3$ ) of **10d**

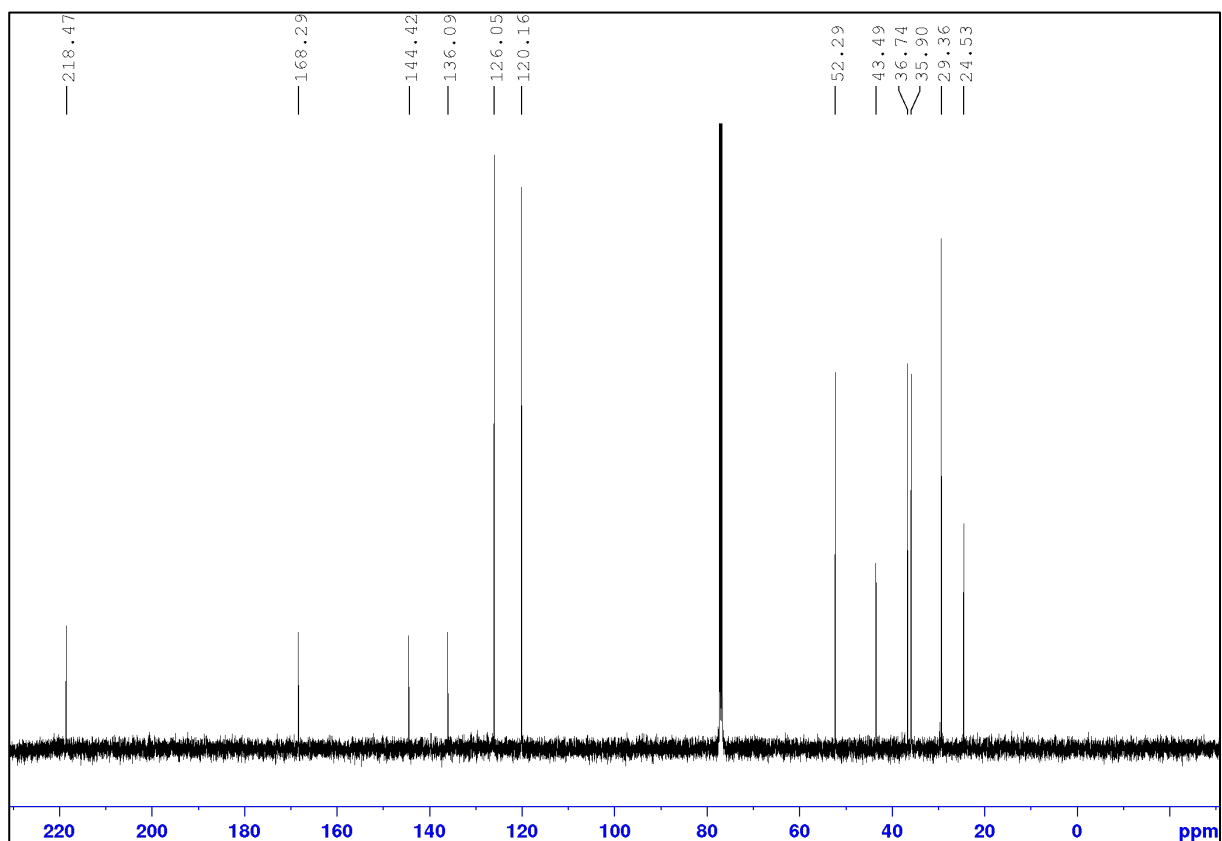

$^1\text{H}$  NMR (500 MHz,  $\text{CDCl}_3$ ) of **10e**

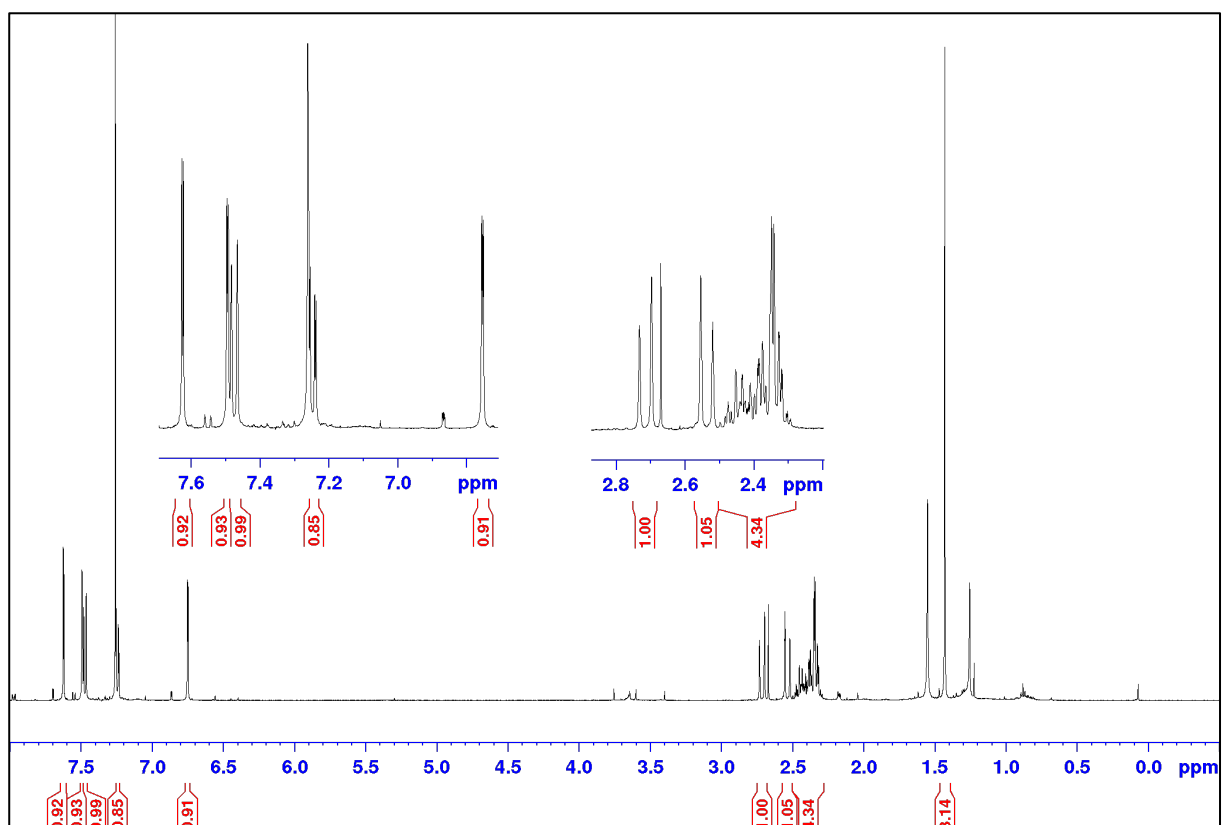

$^{13}\text{C}$  NMR (125 MHz,  $\text{CDCl}_3$ ) of **10e**

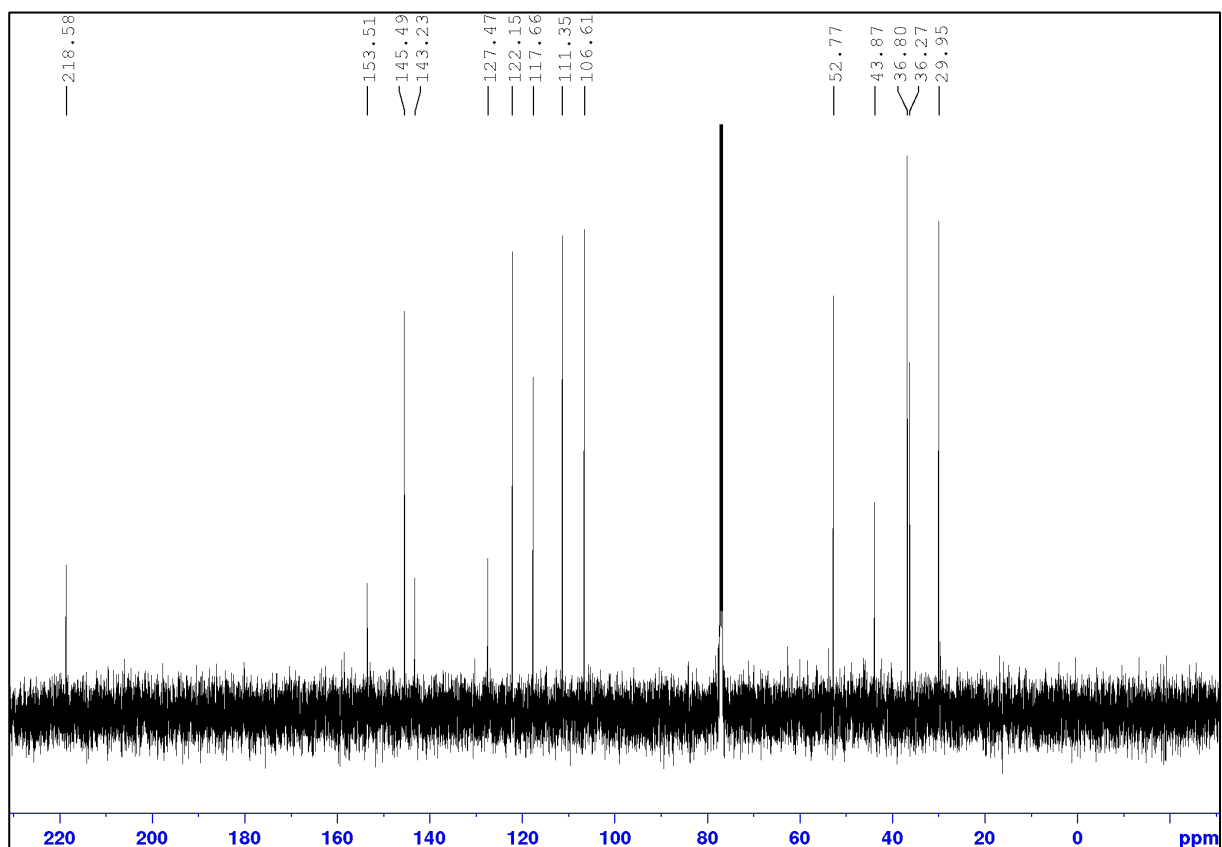

<sup>1</sup>H NMR (500 MHz, CDCl<sub>3</sub>) of **10f**

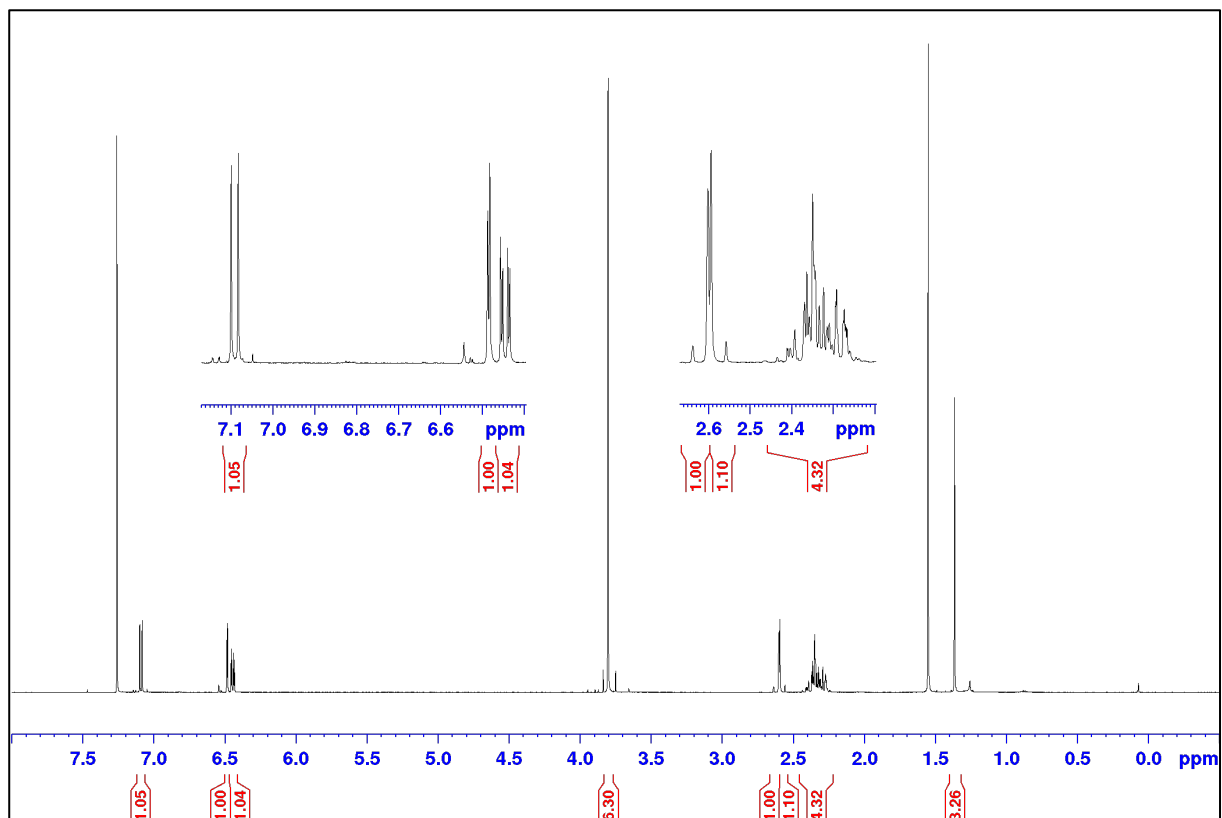

<sup>13</sup>C NMR (125 MHz, CDCl<sub>3</sub>) of **10f**

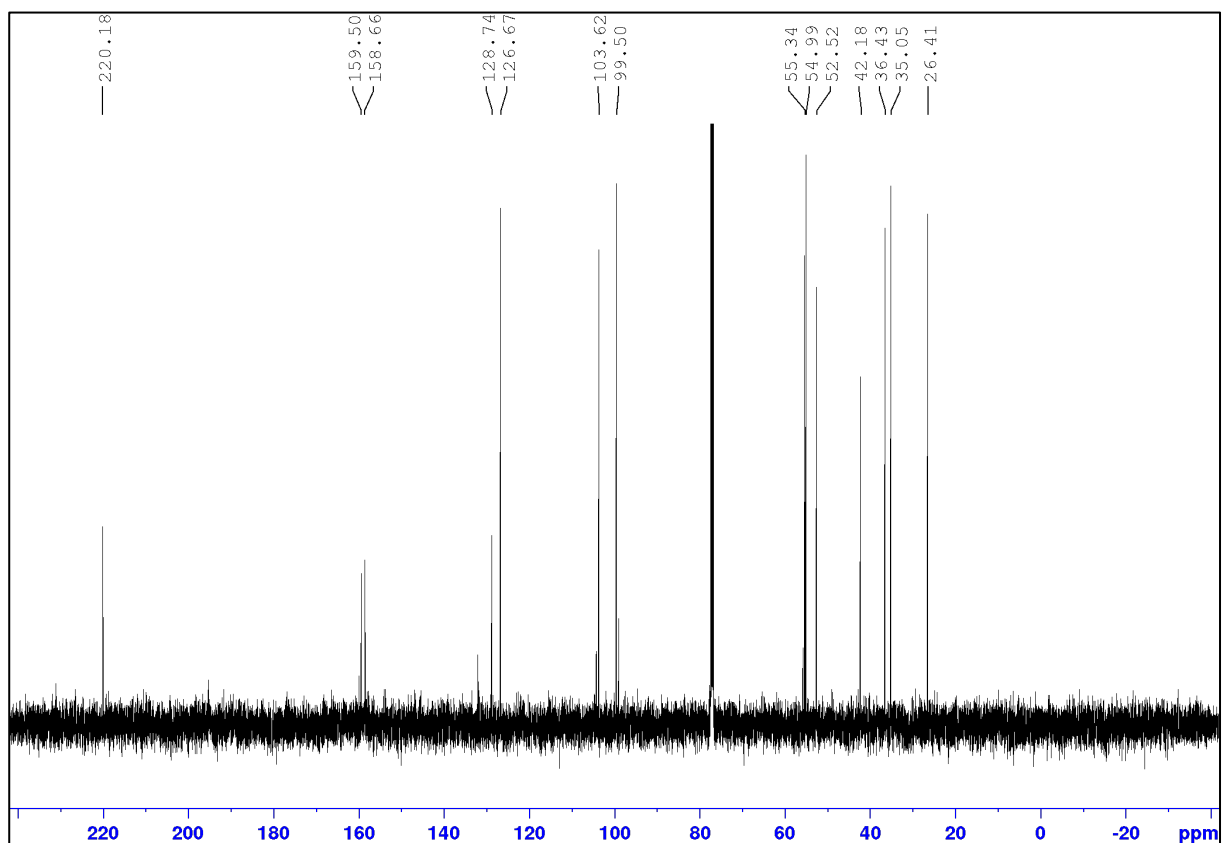

$^1\text{H}$  NMR (500 MHz,  $\text{CDCl}_3$ ) of **10g**

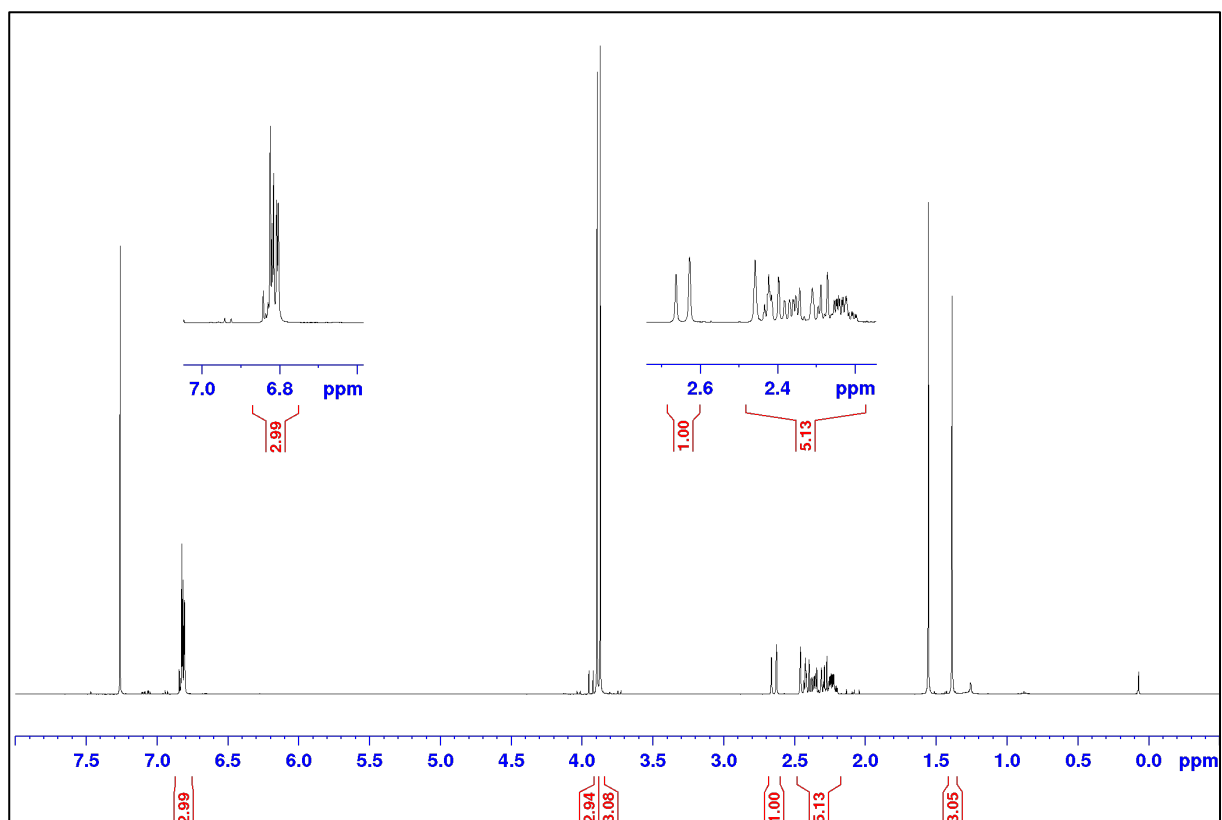

$^{13}\text{C}$  NMR (125 MHz,  $\text{CDCl}_3$ ) of **10g**

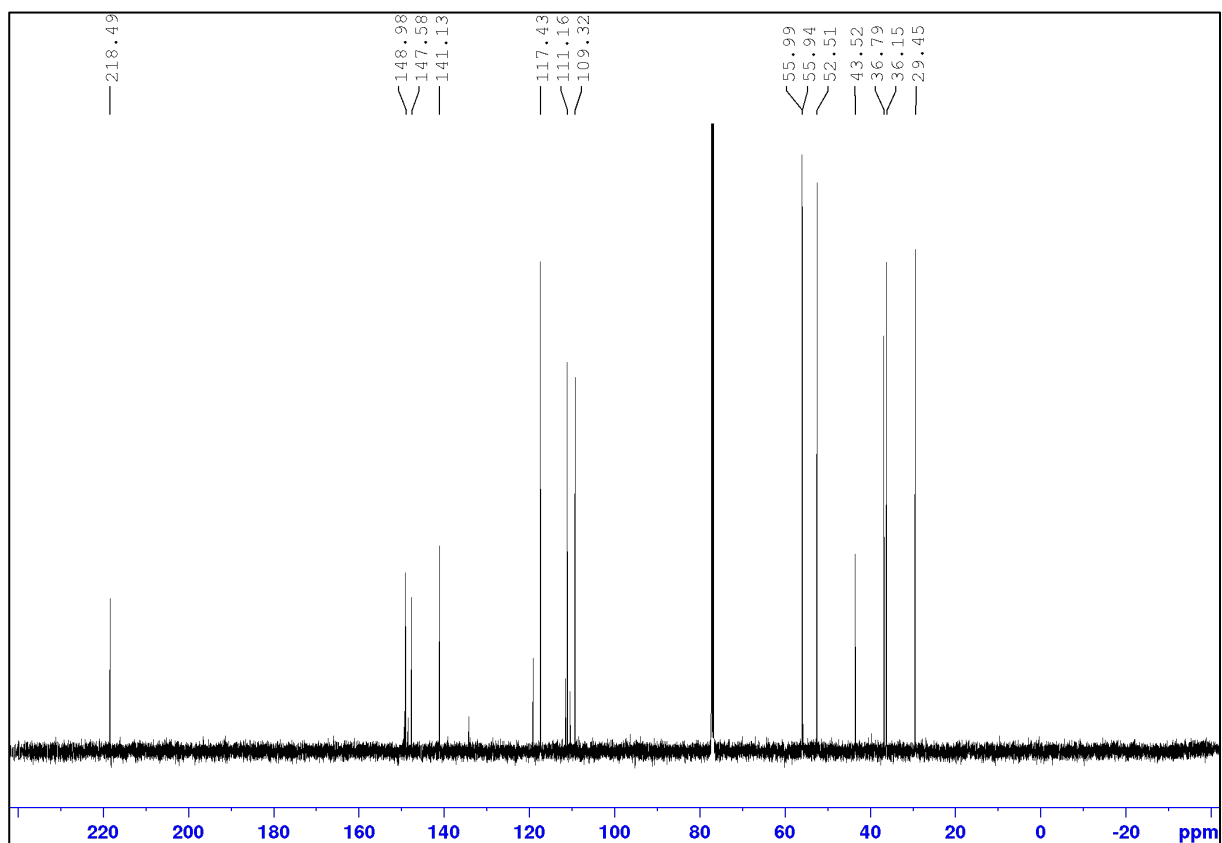

$^1\text{H}$  NMR (500 MHz,  $\text{CDCl}_3$ ) of **10i**

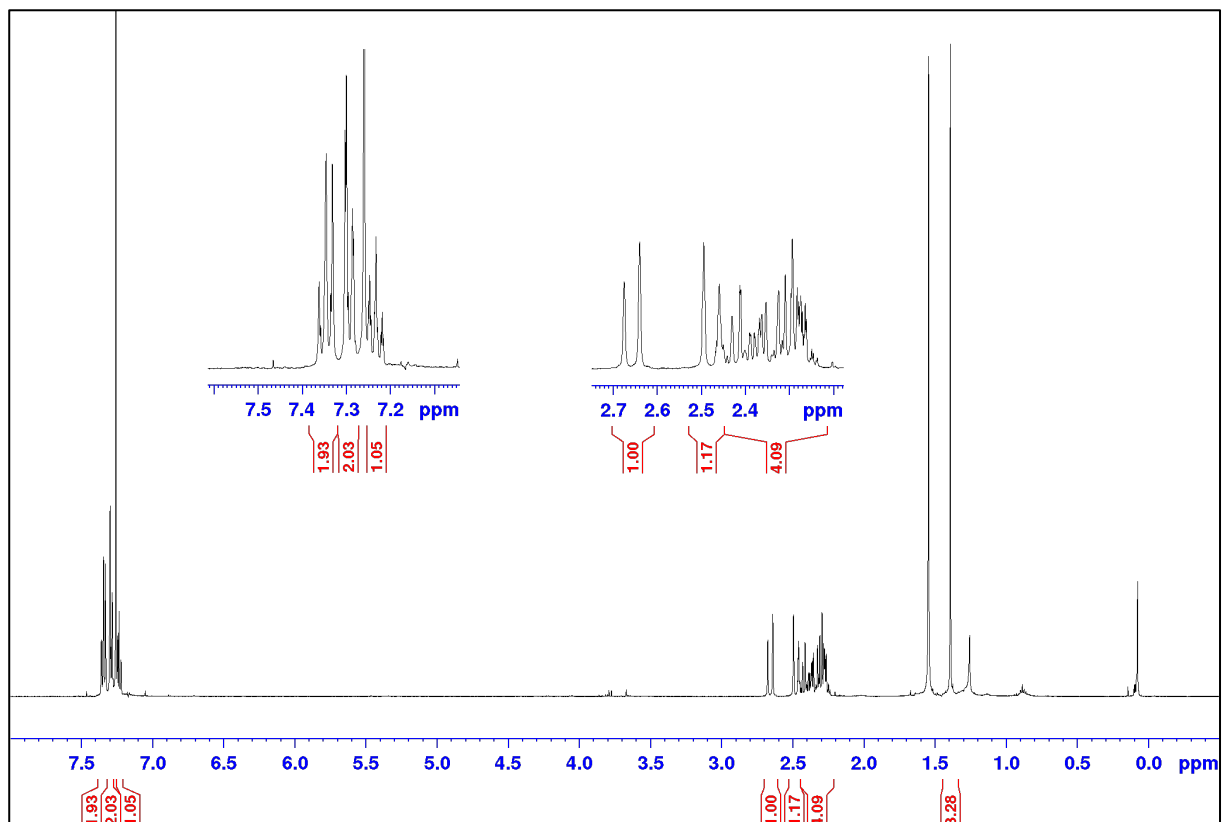

$^1\text{H}$  NMR (500 MHz,  $\text{CDCl}_3$ ) of **10j**

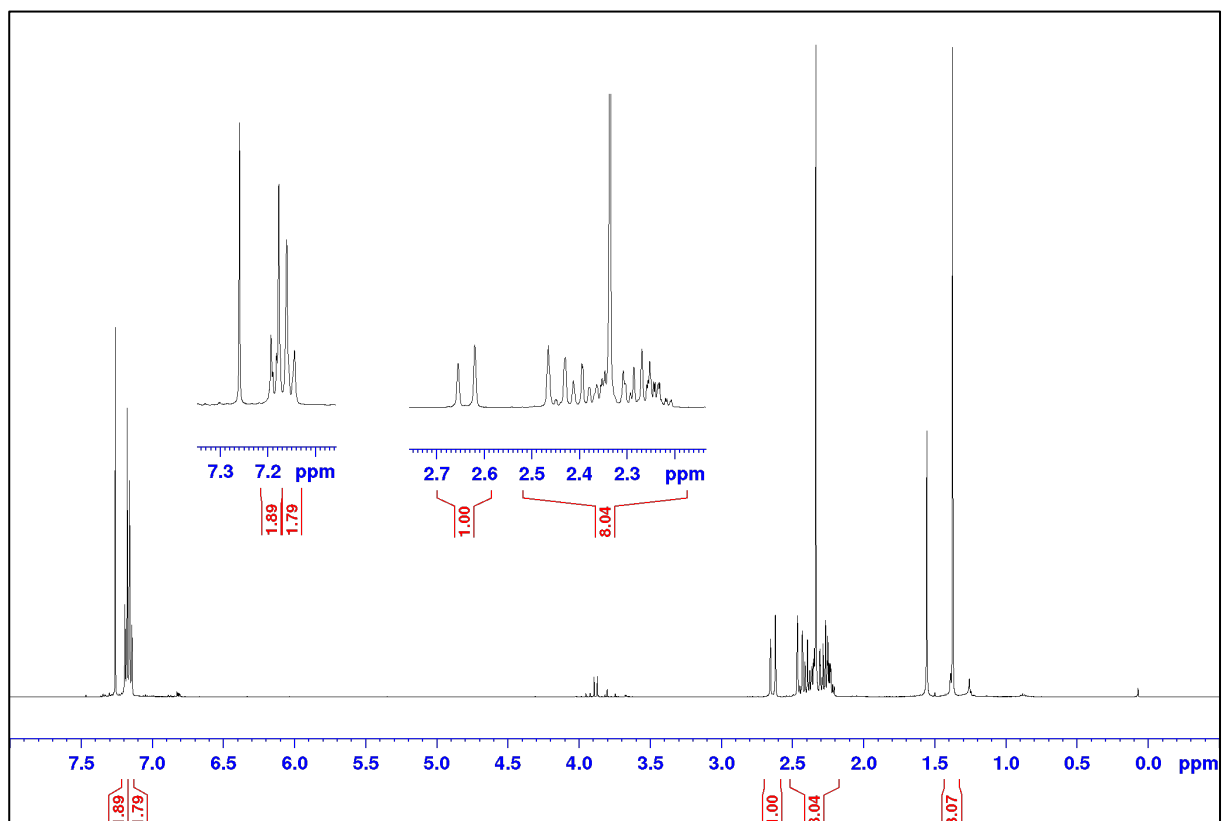

$^1\text{H}$  NMR (500 MHz,  $\text{CDCl}_3$ ) of **10k**

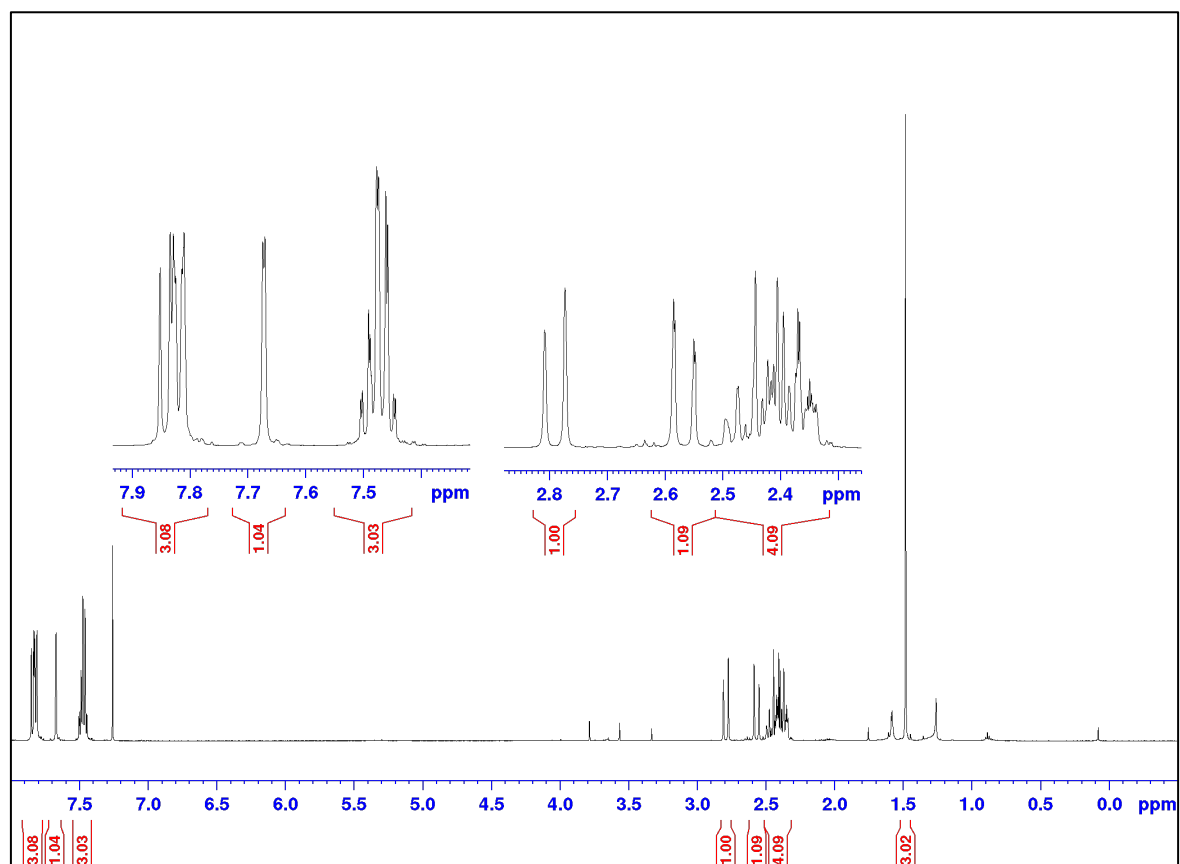

$^{13}\text{C}$  NMR (125 MHz,  $\text{CDCl}_3$ ) of **10k**

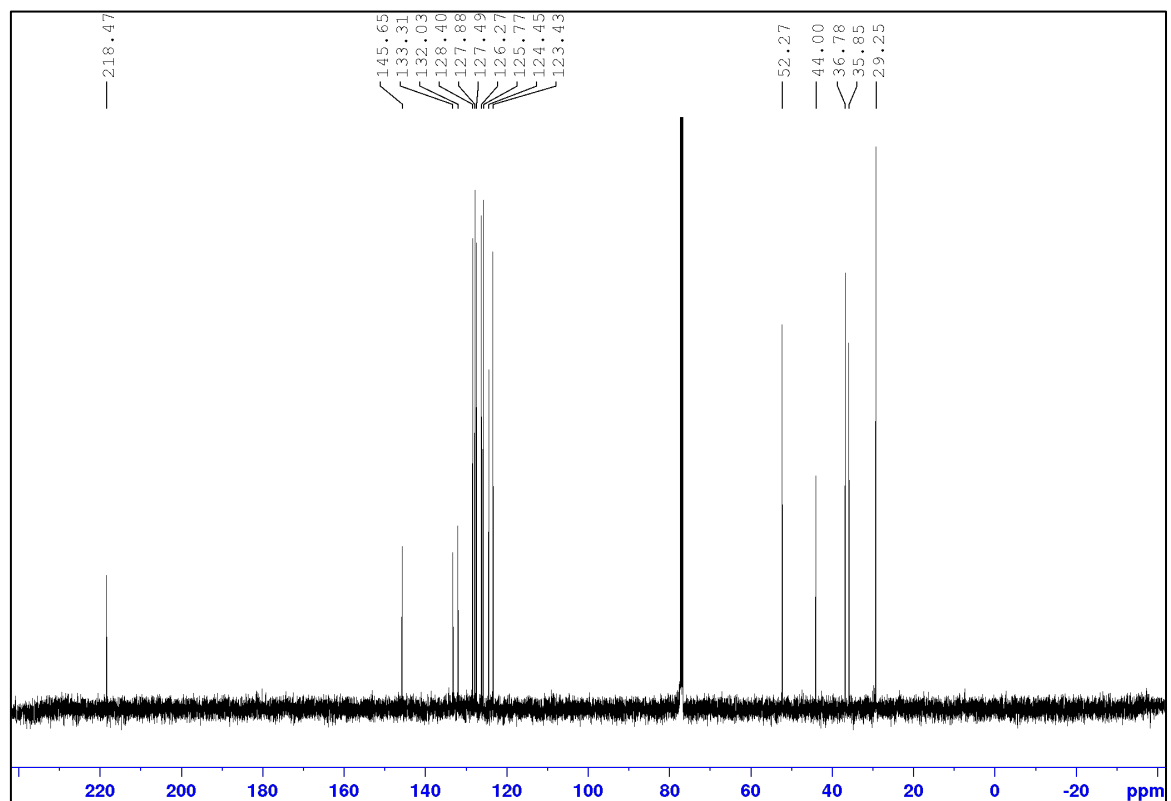

$^1\text{H}$  NMR (500 MHz,  $\text{CDCl}_3$ ) of **101**

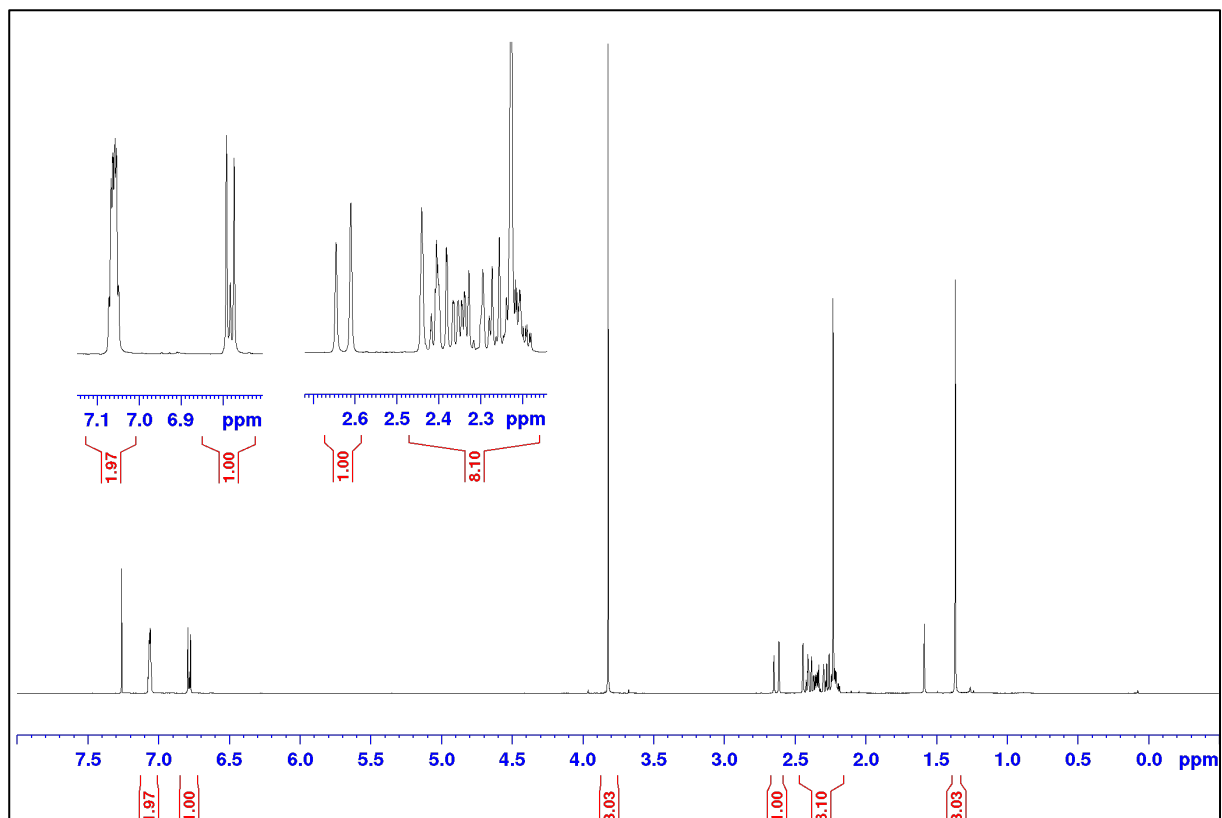

$^{13}\text{C}$  NMR (125 MHz,  $\text{CDCl}_3$ ) of **101**

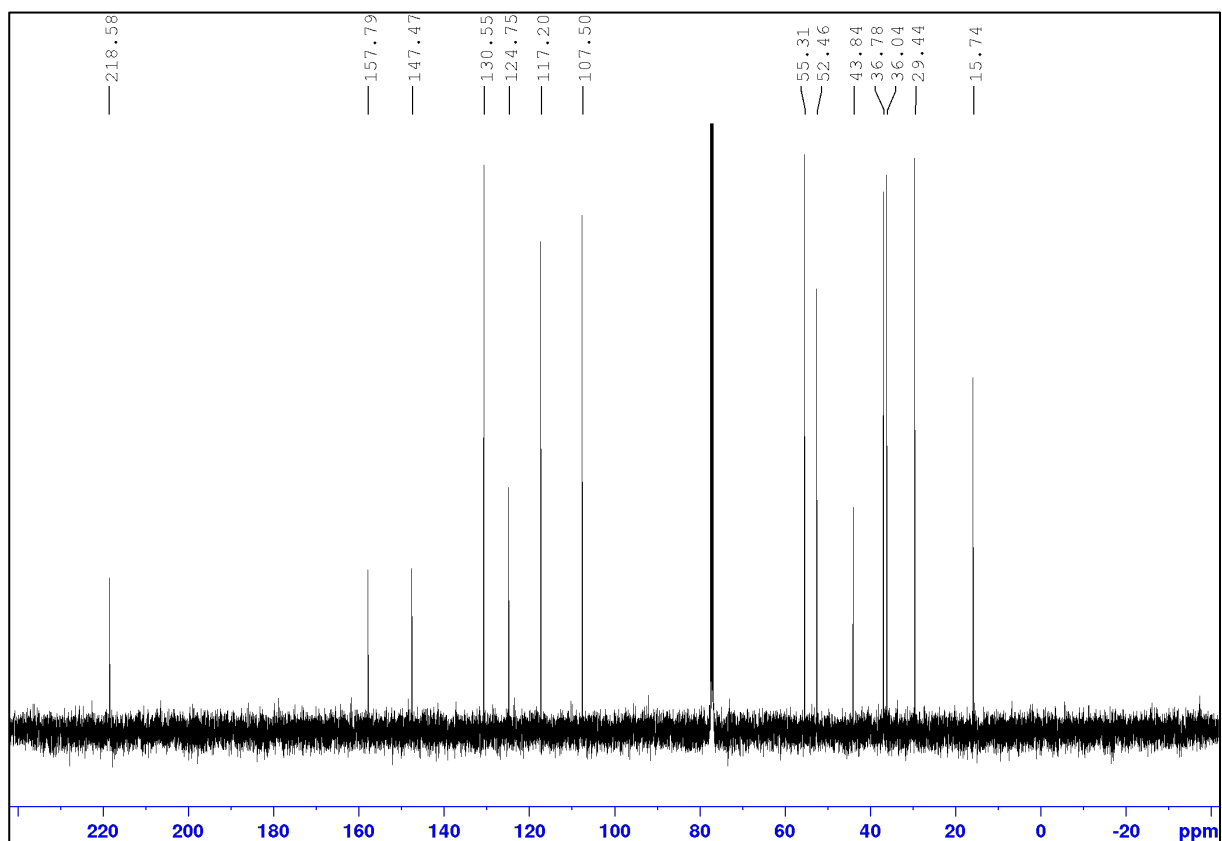

$^1\text{H}$  NMR (500 MHz,  $\text{CDCl}_3$ ) of **6**

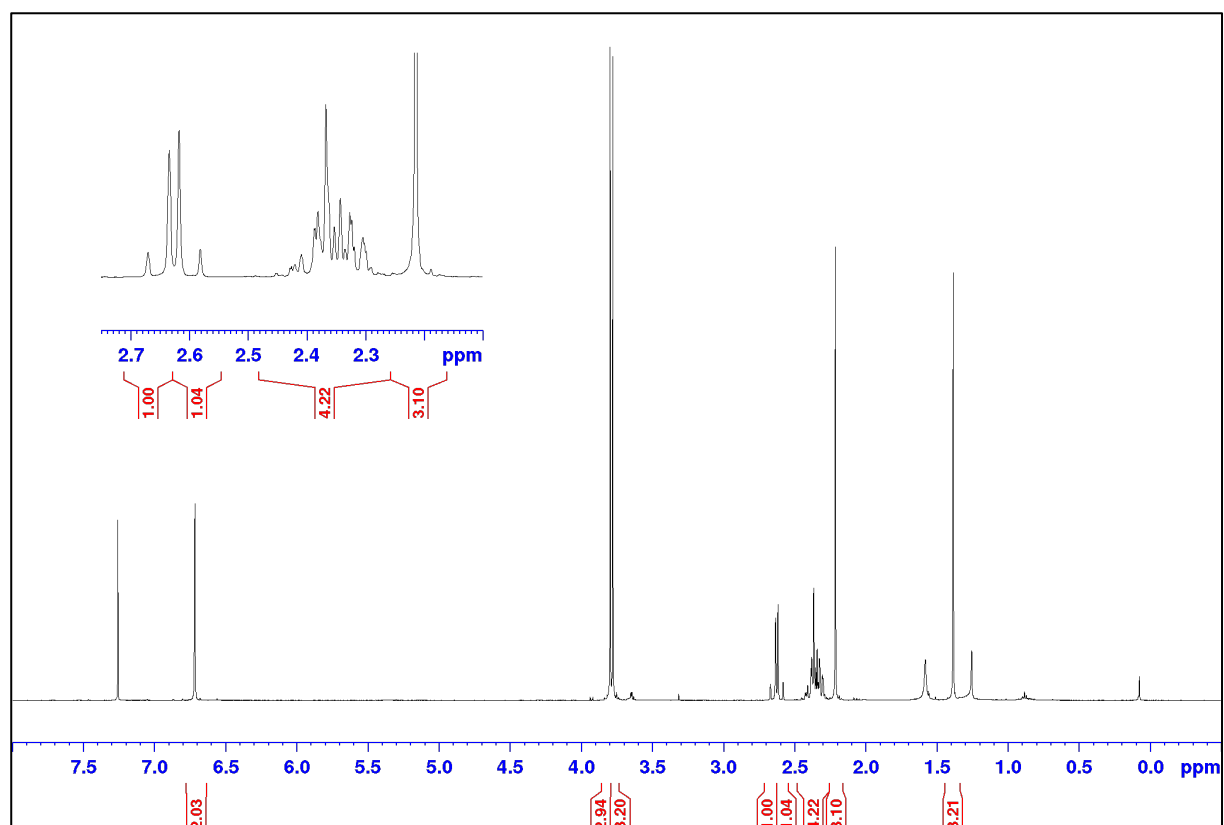



$^1\text{H}$  NMR (500 MHz,  $\text{CDCl}_3$ ) of **10n**

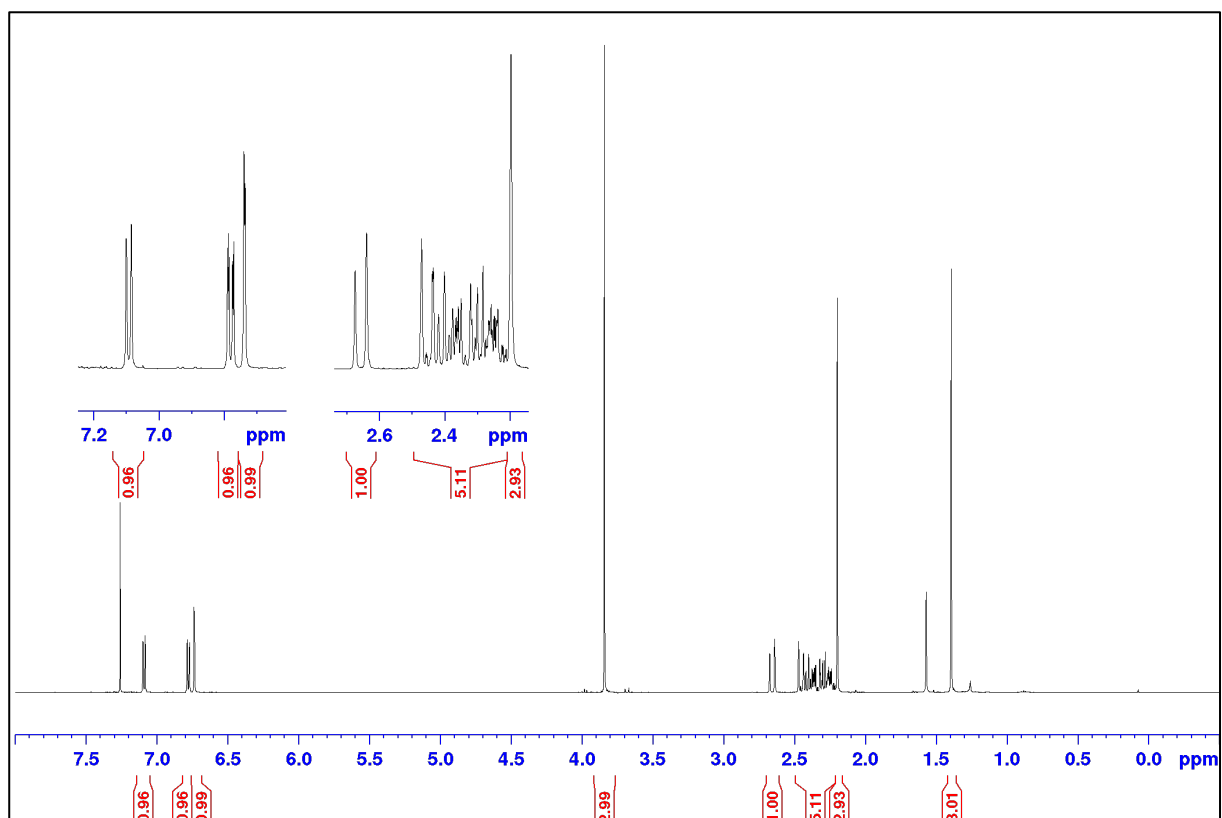

$^{13}\text{C}$  NMR (125 MHz,  $\text{CDCl}_3$ ) of **10n**

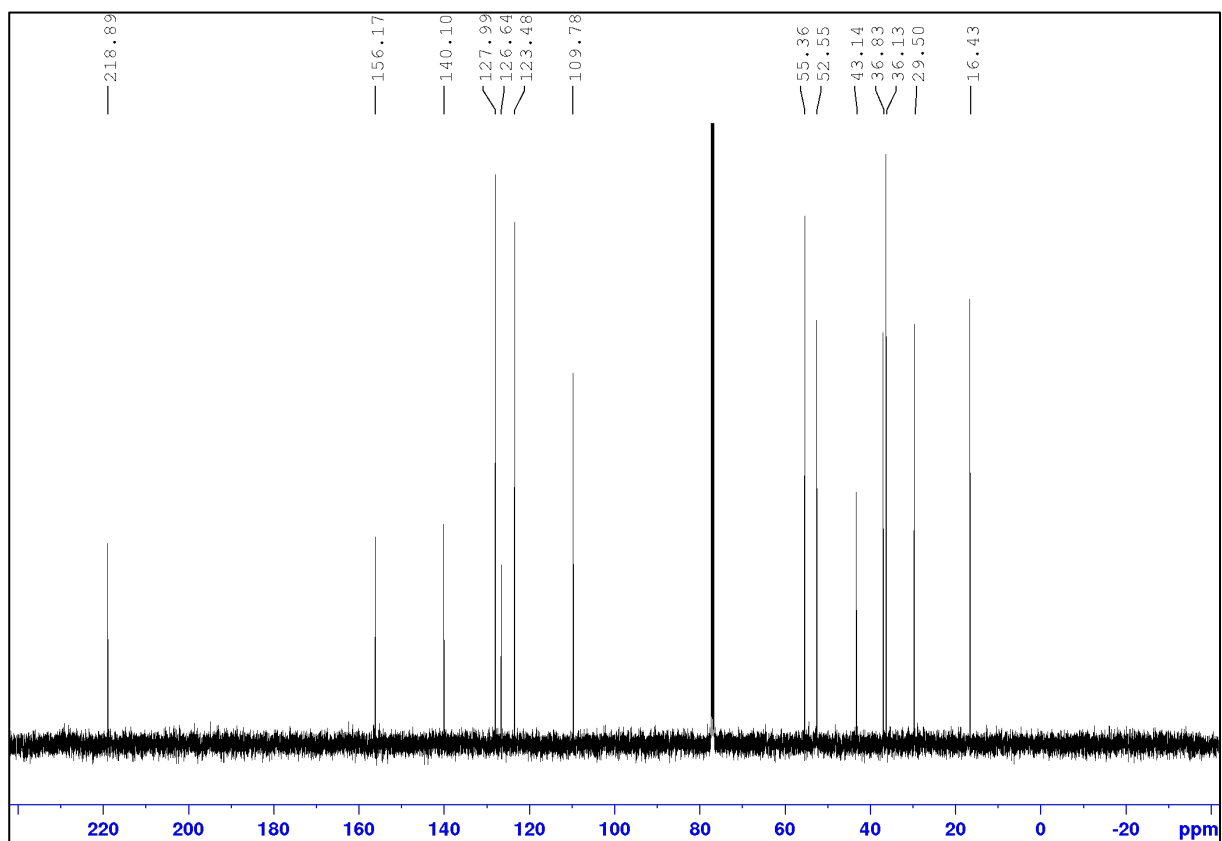

$^1\text{H}$  NMR (500 MHz,  $\text{CDCl}_3$ ) of **5**

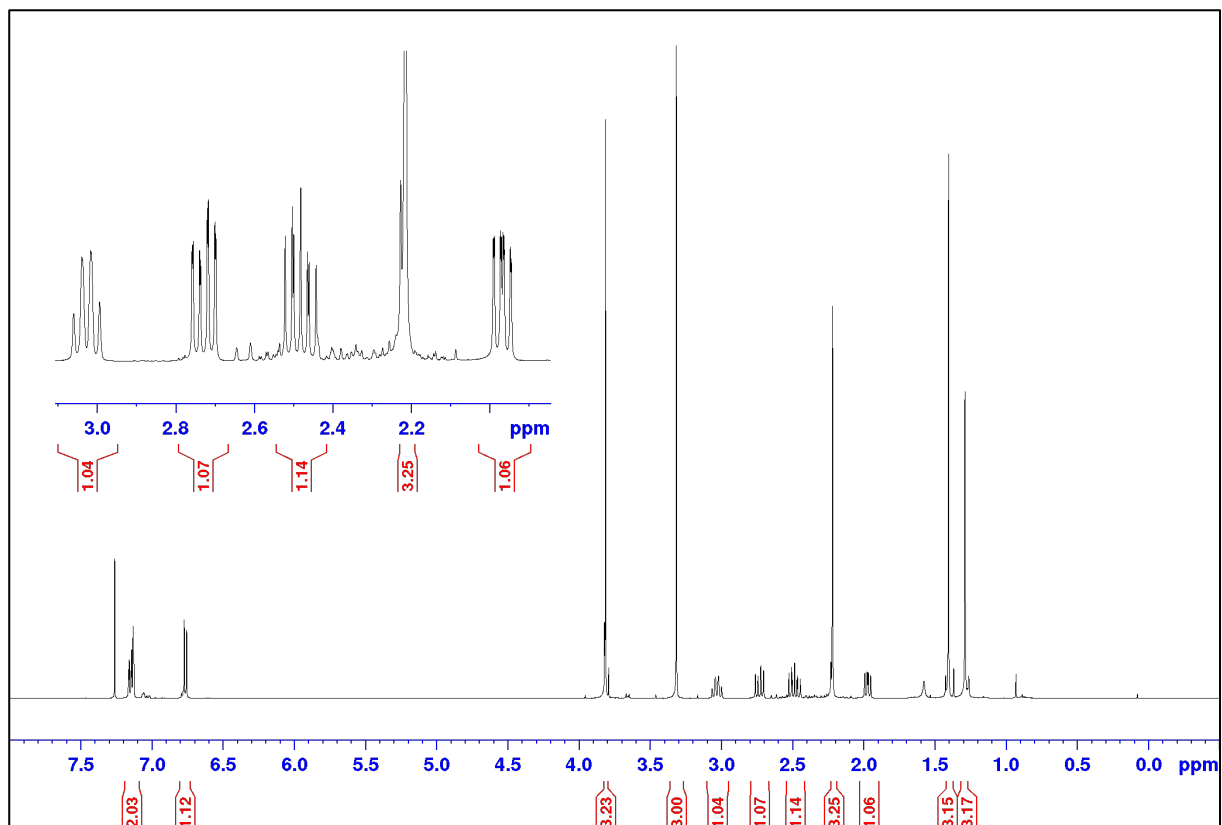

$^{13}\text{C}$  NMR (125 MHz,  $\text{CDCl}_3$ ) of **5**

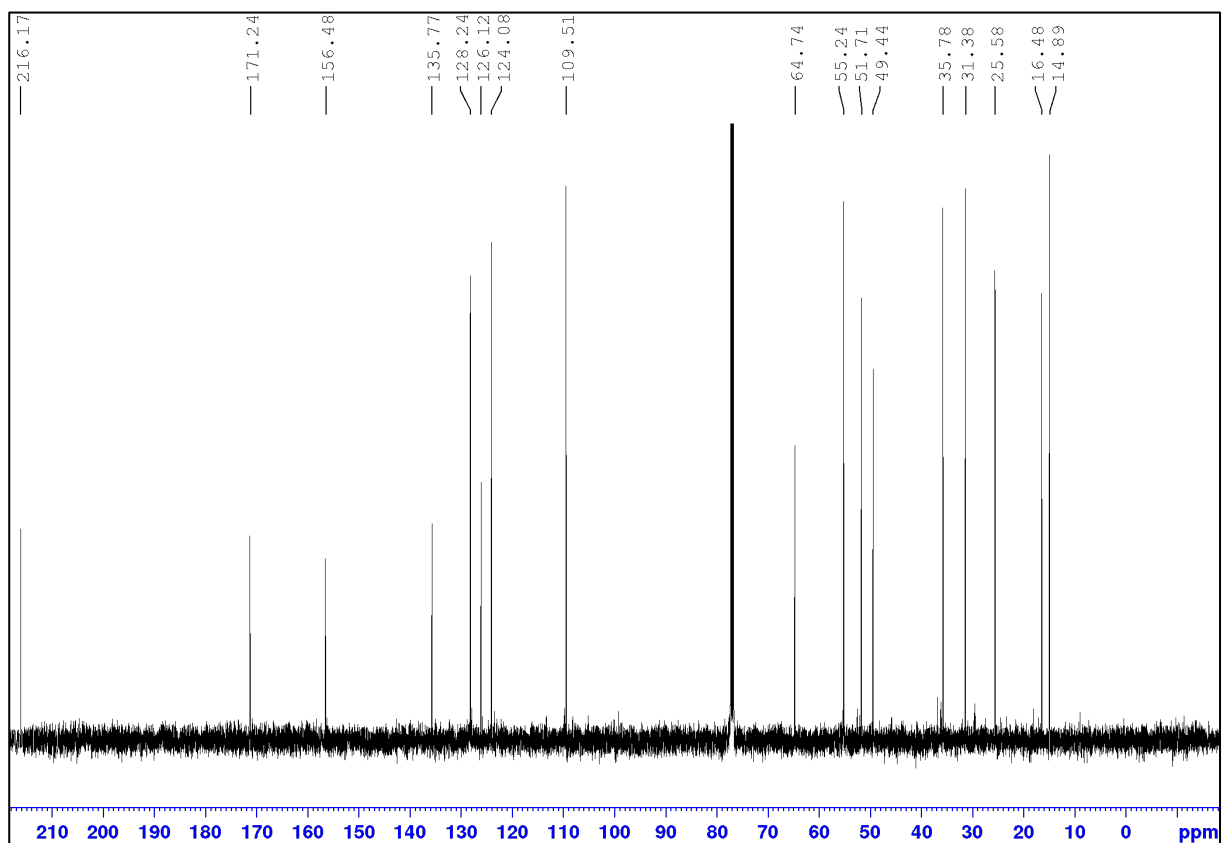

## 5. References

1. S. P. Chavan, M. Thakkar, R. K. Kharul, A. B. Pathak, G B. Bhosekar, M. M. Bhadbhade, *Tetrahedron*, 2005, **61**, 3873.
2. T. L. May, M. K. Brown, A. H. Hoveyda, *Angew. Chem. Int. Ed.*, 2008, **47**, 7358.
3. R. C. Gadwood, *J. Org. Chem*, 1983, **48**, 2098.
4. S. P. Chavan, A. N. Dhawane, U. R. Kalkote, *Synthesis*, 2007, **24**, 3827.
5. J. Buter, R. Moezelaar, A. J. Minnaard, *Org. Biomol. Chem.*, 2014, **12**, 5883.
6. D. A. Evans, D. M. Barnes, J. S. Johnson, T. Lectka, P. Matt, S. J. Miller, J. A. Murry, R. D. Norcross, E. A. Shaughnessy, K. R. Campos, *J. Am. Chem. Soc.* 1999, **121**, 7582.
